# Supplementary material for: Predicting Ovarian/Breast Cancer Pathogenic Risks of Human BRCA1 Gene Variants of Unknown Significance
Source: Hindawi journal article supplement (doi:10.1155/2021/6667201), 2021-01-01
Supplement: f1 [file 6667201.f1.pdf]

| ID | BRCA1 VUS (Variation) | refSeq ID    | Prediction | Clinical significance      |
|----|-----------------------|--------------|------------|----------------------------|
| 1  | c. 5573T>C            | rs755427809  | Benign     | Conflicting interpretation |
| 2  | c. 5511G>T            | rs80356914   | Benign     | Conflicting interpretation |
| 3  | c. 5454C>T            | rs1555574705 | Benign     | Conflicting interpretation |
| 4  | c. 5453A>G            | rs80357477   | Benign     | Conflicting interpretation |
| 5  | c. 5432A>G            | rs80357040   | Pathogenic | Conflicting interpretation |
| 6  | c. 5419A>G            | rs786202721  | Benign     | Conflicting interpretation |
| 7  | c. 5407-25T>A         | rs758780152  | Benign     | Conflicting interpretation |
| 8  | c. 5382G>A            |              | Pathogenic | Conflicting interpretation |
| 9  | c. 5365G>T            | rs80357078   | Benign     | Conflicting interpretation |
| 10 | c. 5365G>A            | rs80357078   | Pathogenic | Conflicting interpretation |
| 11 | c. 5359T>A            | rs80357065   | Benign     | Conflicting interpretation |
| 12 | c. 5357T>C            | rs398122697  | Benign     | Conflicting interpretation |
| 13 | c. 5348T>C            | rs55808233   | Benign     | Conflicting interpretation |
| 14 | c. 5347A>C            | rs80357012   | Benign     | Conflicting interpretation |
| 15 | c. 5333-8C>T          | rs80358084   | Benign     | Conflicting interpretation |
| 16 | c. 5332G>A            | rs80357112   | Pathogenic | Conflicting interpretation |
| 17 | c. 5327C>A            | rs398122695  | Pathogenic | Conflicting interpretation |
| 18 | c. 5317A>T            | rs80357324   | Benign     | Conflicting interpretation |
| 19 | c. 5306A>G            | rs397509257  | Pathogenic | Conflicting interpretation |
| 20 | c. 5285G>A            | rs398122694  | Pathogenic | Conflicting interpretation |
| 21 | c. 5282T>C            | rs80356905   | Benign     | Conflicting interpretation |
| 22 | c. 5277G>A            | rs80356854   | Pathogenic | Conflicting interpretation |
| 23 | c. 5258G>C            | rs397509246  | Benign     | Conflicting interpretation |
| 24 | c. 5257A>G            |              | Benign     | Conflicting interpretation |
| 25 | c. 5242G>C            | rs397507245  | Benign     | Conflicting interpretation |
| 26 | c. 5242G>T            | rs397507245  | Benign     | Conflicting interpretation |
| 27 | c. 5216A>T            | rs80357227   | Benign     | Conflicting interpretation |
| 28 | c. 5216A>G            | rs80357227   | Benign     | Conflicting interpretation |
| 29 | c. 5211A>G            | rs1555576963 | Pathogenic | Conflicting interpretation |
| 30 | c. 5189A>G            | rs80357171   | Benign     | Conflicting interpretation |
| 31 | c. 5152+15A>G         | rs750905289  | Pathogenic | Conflicting interpretation |
| 32 | c. 5143A>T            | rs80357222   | Pathogenic | Conflicting interpretation |
| 33 | c. 5138T>C            | rs80357132   | Benign     | Conflicting interpretation |
| 34 | c. 5108A>G            | rs876660071  | Pathogenic | Conflicting interpretation |
| 35 | c. 5106A>G            | rs1060504574 | Benign     | Conflicting interpretation |
| 36 | c. 5090G>A            | rs397507241  | Pathogenic | Conflicting interpretation |
| 37 | c. 5068A>C            | rs397507239  | Benign     | Conflicting interpretation |
| 38 | c. 5014C>T            | rs587781477  | Benign     | Conflicting interpretation |
| 39 | c. 5005G>T            | rs80357087   | Benign     | Conflicting interpretation |
| 40 | c. 4993G>A            | rs80357169   | Benign     | Conflicting interpretation |
| 41 | c. 4987-5T>C          | rs397509214  | Benign     | Conflicting interpretation |
| 42 | c. 4970T>C            |              | Benign     | Conflicting interpretation |
| 43 | c. 4963T>C            | rs1057518639 | Benign     | Conflicting interpretation |
| 44 | c. 4954A>T            | rs1348949389 | Benign     | Conflicting interpretation |
| 45 | c. 4941C>A            | rs80357302   | Benign     | Conflicting interpretation |
| 46 | c. 4935G>C            | rs80357373   | Pathogenic | Conflicting interpretation |
| 47 | c. 4934G>C            | rs70953661   | Benign     | Conflicting interpretation |
| 48 | c. 4882A>G            | rs80357465   | Benign     | Conflicting interpretation |
| 49 | c. 4858A>G            | rs8176219    | Pathogenic | Conflicting interpretation |
| 50 | c. 4837A>T            | rs1799966    | Pathogenic | Conflicting interpretation |
| 51 | c. 4776C>G            | rs761925468  | Benign     | Conflicting interpretation |
| 52 | c. 4775A>G            | rs786203699  | Benign     | Conflicting interpretation |
| 53 | c. 4766G>A            | rs80357341   | Benign     | Conflicting interpretation |

|     |                 |              |            |                         |
|-----|-----------------|--------------|------------|-------------------------|
| 54  | c. 4765C>T      | rs80357002   | Benign     | Conflicting interpretat |
| 55  | c. 4735C>G      | rs145466894  | Pathogenic | Conflicting interpretat |
| 56  | c. 4729T>C      | rs80356909   | Benign     | Conflicting interpretat |
| 57  | c. 4683C>G      | rs878853265  | Benign     | Conflicting interpretat |
| 58  | c. 4657T>A      | rs80357431   | Benign     | Conflicting interpretat |
| 59  | c. 4654T>C      | rs1265352633 | Benign     | Conflicting interpretat |
| 60  | c. 4643C>T      | rs273900737  | Benign     | Conflicting interpretat |
| 61  | c. 4638T>G      | rs397507235  | Benign     | Conflicting interpretat |
| 62  | c. 4635C>G      | rs373686790  | Benign     | Conflicting interpretat |
| 63  | c. 4625C>G      | rs41293457   | Benign     | Conflicting interpretat |
| 64  | c. 4610A>G      | rs70953659   | Benign     | Conflicting interpretat |
| 65  | c. 4585A>G      | rs80357095   | Pathogenic | Conflicting interpretat |
| 66  | c. 4505C>A      | rs56335406   | Benign     | Conflicting interpretat |
| 67  | c. 4410A>T      | rs80357075   | Pathogenic | Conflicting interpretat |
| 68  | c. 4361T>C      | rs587782606  | Benign     | Conflicting interpretat |
| 69  | c. 4358-2725T>C | rs374519494  | Benign     | Conflicting interpretat |
| 70  | c. 4352A>G      | rs949793708  | Benign     | Conflicting interpretat |
| 71  | c. 4344C>T      | rs1250691798 | Benign     | Conflicting interpretat |
| 72  | c. 4343G>A      | rs80357354   | Benign     | Conflicting interpretat |
| 73  | c. 4342A>G      | rs80357486   | Benign     | Conflicting interpretat |
| 74  | c. 4315C>T      | rs781260818  | Benign     | Conflicting interpretat |
| 75  | c. 4262A>G      | rs80357079   | Benign     | Conflicting interpretat |
| 76  | c. 4261C>T      | rs80357013   | Benign     | Conflicting interpretat |
| 77  | c. 4213A>G      | rs80357353   | Benign     | Conflicting interpretat |
| 78  | c. 4185+14G>C   | rs762153716  | Pathogenic | Conflicting interpretat |
| 79  | c. 4184A>G      | rs80356972   | Pathogenic | Conflicting interpretat |
| 80  | c. 4181C>T      | rs397507226  | Benign     | Conflicting interpretat |
| 81  | c. 4166G>A      | rs78951648   | Pathogenic | Conflicting interpretat |
| 82  | c. 4127C>G      | rs80356986   | Benign     | Conflicting interpretat |
| 83  | c. 4115G>A      | rs55848034   | Pathogenic | Conflicting interpretat |
| 84  | c. 4111G>C      | rs774593602  | Benign     | Conflicting interpretat |
| 85  | c. 4036G>A      | rs80357407   | Pathogenic | Conflicting interpretat |
| 86  | c. 3963C>G      | rs1567789440 | Benign     | Conflicting interpretat |
| 87  | c. 3956G>A      | rs587782634  | Pathogenic | Conflicting interpretat |
| 88  | c. 3944C>G      | rs80357500   | Benign     | Conflicting interpretat |
| 89  | c. 3929C>A      | rs80357257   | Benign     | Conflicting interpretat |
| 90  | c. 3848A>G      | rs80357047   | Benign     | Conflicting interpretat |
| 91  | c. 3845A>T      | rs80357217   | Pathogenic | Conflicting interpretat |
| 92  | c. 3835G>A      | rs80357036   | Benign     | Conflicting interpretat |
| 93  | c. 3818A>G      | rs431825400  | Pathogenic | Conflicting interpretat |
| 94  | c. 3815A>G      | rs772703445  | Benign     | Conflicting interpretat |
| 95  | c. 3776A>C      | rs483353090  | Benign     | Conflicting interpretat |
| 96  | c. 3750G>C      | rs145903082  | Benign     | Conflicting interpretat |
| 97  | c. 3737C>A      | rs878854949  | Benign     | Conflicting interpretat |
| 98  | c. 3722C>A      | rs80357143   | Pathogenic | Conflicting interpretat |
| 99  | c. 3712C>T      | rs876659772  | Benign     | Conflicting interpretat |
| 100 | c. 3711A>G      | rs80357388   | Pathogenic | Conflicting interpretat |
| 101 | c. 3707A>G      | rs863224760  | Benign     | Conflicting interpretat |
| 102 | c. 3691T>C      | rs41293451   | Benign     | Conflicting interpretat |
| 103 | c. 3596C>T      | rs587782458  | Benign     | Conflicting interpretat |
| 104 | c. 3560G>A      | rs80356975   | Pathogenic | Conflicting interpretat |
| 105 | c. 3454G>A      | rs80357175   | Pathogenic | Conflicting interpretat |
| 106 | c. 3410T>C      | rs80357297   | Benign     | Conflicting interpretat |
| 107 | c. 3367G>T      | rs80356867   | Pathogenic | Conflicting interpretat |

|     |            |              |            |                         |
|-----|------------|--------------|------------|-------------------------|
| 108 | c. 3362A>G | rs80356919   | Benign     | Conflicting interpretat |
| 109 | c. 3355A>T | rs80356949   | Pathogenic | Conflicting interpretat |
| 110 | c. 3346G>C | rs55909400   | Benign     | Conflicting interpretat |
| 111 | c. 3270A>T | rs369925993  | Benign     | Conflicting interpretat |
| 112 | c. 3247A>G | rs397507213  | Pathogenic | Conflicting interpretat |
| 113 | c. 3211G>A | rs41293445   | Pathogenic | Conflicting interpretat |
| 114 | c. 3206A>C | rs879254151  | Benign     | Conflicting interpretat |
| 115 | c. 3181A>G | rs876658975  | Benign     | Conflicting interpretat |
| 116 | c. 3179A>C | rs80357184   | Benign     | Conflicting interpretat |
| 117 | c. 3113A>C | rs16941      | Benign     | Conflicting interpretat |
| 118 | c. 3055A>G | rs80357311   | Benign     | Conflicting interpretat |
| 119 | c. 3041T>C | rs80357020   | Benign     | Conflicting interpretat |
| 120 | c. 3027A>C | rs1555588512 | Benign     | Conflicting interpretat |
| 121 | c. 3008T>C |              | Benign     | Conflicting interpretat |
| 122 | c. 2987A>G | rs786202898  | Benign     | Conflicting interpretat |
| 123 | c. 2964A>G | rs1064796061 | Pathogenic | Conflicting interpretat |
| 124 | c. 2963C>T | rs397507206  | Benign     | Conflicting interpretat |
| 125 | c. 2936G>A | rs80356985   | Benign     | Conflicting interpretat |
| 126 | c. 2935C>T | rs80356970   | Benign     | Conflicting interpretat |
| 127 | c. 2910A>C | rs431825394  | Benign     | Conflicting interpretat |
| 128 | c. 2773A>G | rs4986847    | Pathogenic | Conflicting interpretat |
| 129 | c. 2735A>G | rs397507204  | Benign     | Conflicting interpretat |
| 130 | c. 2726A>T | rs80357127   | Benign     | Conflicting interpretat |
| 131 | c. 2668G>A | rs80357200   | Pathogenic | Conflicting interpretat |
| 132 | c. 2666C>T | rs769712441  | Benign     | Conflicting interpretat |
| 133 | c. 2662C>T | rs80357480   | Benign     | Conflicting interpretat |
| 134 | c. 2657C>G | rs587782134  | Benign     | Conflicting interpretat |
| 135 | c. 2630A>G | rs786203689  | Benign     | Conflicting interpretat |
| 136 | c. 2612C>G | rs799917     | Benign     | Conflicting interpretat |
| 137 | c. 2518A>T | rs377475866  | Pathogenic | Conflicting interpretat |
| 138 | c. 2500G>C | rs786202215  | Benign     | Conflicting interpretat |
| 139 | c. 2481A>G | rs397508970  | Benign     | Conflicting interpretat |
| 140 | c. 2481A>C | rs397508970  | Benign     | Conflicting interpretat |
| 141 | c. 2473G>T | rs80357328   | Pathogenic | Conflicting interpretat |
| 142 | c. 2447A>G | rs80357108   | Pathogenic | Conflicting interpretat |
| 143 | c. 2426A>G | rs397507201  | Benign     | Conflicting interpretat |
| 144 | c. 2416G>A | rs80357144   | Pathogenic | Conflicting interpretat |
| 145 | c. 2393C>T | rs876660005  | Benign     | Conflicting interpretat |
| 146 | c. 2368A>G | rs41286298   | Benign     | Conflicting interpretat |
| 147 | c. 2347A>G | rs80356948   | Pathogenic | Conflicting interpretat |
| 148 | c. 2329T>G | rs397507199  | Pathogenic | Conflicting interpretat |
| 149 | c. 2268G>T | rs80356884   | Benign     | Conflicting interpretat |
| 150 | c. 2268G>C | rs80356884   | Pathogenic | Conflicting interpretat |
| 151 | c. 2264A>G | rs922908090  | Benign     | Conflicting interpretat |
| 152 | c. 2252T>C | rs587781684  | Benign     | Conflicting interpretat |
| 153 | c. 2224A>G | rs876658733  | Pathogenic | Conflicting interpretat |
| 154 | c. 2222C>T | rs80357051   | Benign     | Conflicting interpretat |
| 155 | c. 2207A>C | rs397507196  | Benign     | Conflicting interpretat |
| 156 | c. 2155A>G | rs80357147   | Pathogenic | Conflicting interpretat |
| 157 | c. 2123C>T | rs80357182   | Benign     | Conflicting interpretat |
| 158 | c. 2123C>A | rs80357182   | Pathogenic | Conflicting interpretat |
| 159 | c. 2086A>G | rs80357441   | Pathogenic | Conflicting interpretat |
| 160 | c. 2083G>A | rs28897681   | Benign     | Conflicting interpretat |
| 161 | c. 2060A>C | rs28897680   | Benign     | Conflicting interpretat |

|     |            |              |            |                         |
|-----|------------|--------------|------------|-------------------------|
| 162 | c. 2043T>G | rs143920945  | Benign     | Conflicting interpretat |
| 163 | c. 2006T>C | rs80356895   | Benign     | Conflicting interpretat |
| 164 | c. 1974G>C | rs55678461   | Benign     | Conflicting interpretat |
| 165 | c. 1960A>C | rs80357355   | Benign     | Conflicting interpretat |
| 166 | c. 1920A>G | rs587782843  | Benign     | Conflicting interpretat |
| 167 | c. 1907G>A | rs398122649  | Pathogenic | Conflicting interpretat |
| 168 | c. 1897C>T | rs80356902   | Benign     | Conflicting interpretat |
| 169 | c. 1879G>A | rs80357425   | Pathogenic | Conflicting interpretat |
| 170 | c. 1849A>G | rs45564238   | Pathogenic | Conflicting interpretat |
| 171 | c. 1837A>G | rs863224753  | Pathogenic | Conflicting interpretat |
| 172 | c. 1805A>G | rs1567798189 | Benign     | Conflicting interpretat |
| 173 | c. 1802A>G | rs371631805  | Benign     | Conflicting interpretat |
| 174 | c. 1775G>A | rs786203044  | Pathogenic | Conflicting interpretat |
| 175 | c. 1772T>C | rs80356859   | Benign     | Conflicting interpretat |
| 176 | c. 1747A>G | rs80356928   | Benign     | Conflicting interpretat |
| 177 | c. 1745C>T | rs786202386  | Benign     | Conflicting interpretat |
| 178 | c. 1724A>G | rs111539978  | Benign     | Conflicting interpretat |
| 179 | c. 1713A>G | rs552505690  | Pathogenic | Conflicting interpretat |
| 180 | c. 1712T>C | rs80357159   | Benign     | Conflicting interpretat |
| 181 | c. 1609A>G | rs398122639  | Pathogenic | Conflicting interpretat |
| 182 | c. 1601A>G | rs80357173   | Pathogenic | Conflicting interpretat |
| 183 | c. 1581G>C | rs80357493   | Benign     | Conflicting interpretat |
| 184 | c. 1573G>A | rs80357273   | Benign     | Conflicting interpretat |
| 185 | c. 1561G>A | rs80357122   | Pathogenic | Conflicting interpretat |
| 186 | c. 1560A>G | rs1555591570 | Benign     | Conflicting interpretat |
| 187 | c. 1508A>G | rs62625304   | Benign     | Conflicting interpretat |
| 188 | c. 1459G>T | rs369588942  | Benign     | Conflicting interpretat |
| 189 | c. 1457T>C |              | Benign     | Conflicting interpretat |
| 190 | c. 1456T>A | rs55906931   | Benign     | Conflicting interpretat |
| 191 | c. 1441C>G | rs1397842308 | Pathogenic | Conflicting interpretat |
| 192 | c. 1405G>A | rs397507187  | Benign     | Conflicting interpretat |
| 193 | c. 1400A>G | rs876659316  | Benign     | Conflicting interpretat |
| 194 | c. 1397G>A | rs199540030  | Benign     | Conflicting interpretat |
| 195 | c. 1396C>T | rs80356964   | Benign     | Conflicting interpretat |
| 196 | c. 1357G>C | rs768054411  | Benign     | Conflicting interpretat |
| 197 | c. 1258G>T | rs80357488   | Pathogenic | Conflicting interpretat |
| 198 | c. 1253A>C | rs1555592050 | Benign     | Conflicting interpretat |
| 199 | c. 1250A>G | rs80357113   | Benign     | Conflicting interpretat |
| 200 | c. 1243G>A | rs587782770  | Benign     | Conflicting interpretat |
| 201 | c. 1233T>C | rs80357024   | Benign     | Conflicting interpretat |
| 202 | c. 1222A>G | rs80357253   | Benign     | Conflicting interpretat |
| 203 | c. 1202G>A | rs397507184  | Benign     | Conflicting interpretat |
| 204 | c. 1081T>C | rs80356946   | Benign     | Conflicting interpretat |
| 205 | c. 1026G>A | rs1171571879 | Pathogenic | Conflicting interpretat |
| 206 | c. 1016A>G | rs587781737  | Benign     | Conflicting interpretat |
| 207 | c. 1015A>G | rs55842957   | Benign     | Conflicting interpretat |
| 208 | c. 1011A>G | rs1555592670 | Benign     | Conflicting interpretat |
| 209 | c. 1008A>G | rs1060504568 | Pathogenic | Conflicting interpretat |
| 210 | c. 995G>A  | rs80357464   | Benign     | Conflicting interpretat |
| 211 | c. 994C>T  | rs80357176   | Benign     | Conflicting interpretat |
| 212 | c. 964G>C  | rs80357252   | Benign     | Conflicting interpretat |
| 213 | c. 964G>A  | rs80357252   | Pathogenic | Conflicting interpretat |
| 214 | c. 889A>C  | rs80357196   | Benign     | Conflicting interpretat |
| 215 | c. 886A>G  | rs748675395  | Pathogenic | Conflicting interpretat |



|     |             |              |            |                         |
|-----|-------------|--------------|------------|-------------------------|
| 216 | c. 811G>A   | rs80357244   | Pathogenic | Conflicting interpretat |
| 217 | c. 755G>A   | rs80357138   | Benign     | Conflicting interpretat |
| 218 | c. 754C>T   | rs273902786  | Benign     | Conflicting interpretat |
| 219 | c. 742A>C   | rs879255288  | Benign     | Conflicting interpretat |
| 220 | c. 707C>T   |              | Benign     | Conflicting interpretat |
| 221 | c. 697G>A   | rs959797914  | Pathogenic | Conflicting interpretat |
| 222 | c. 694G>A   | rs55975699   | Benign     | Conflicting interpretat |
| 223 | c. 692C>T   | rs80357001   | Benign     | Conflicting interpretat |
| 224 | c. 672T>G   | rs1064794486 | Benign     | Conflicting interpretat |
| 225 | c. 661G>T   | rs80357088   | Benign     | Conflicting interpretat |
| 226 | c. 655G>A   | rs273902779  | Pathogenic | Conflicting interpretat |
| 227 | c. 630A>G   | rs1555593567 | Benign     | Conflicting interpretat |
| 228 | c. 612G>C   | rs80357394   | Benign     | Conflicting interpretat |
| 229 | c. 572T>A   | rs80357142   | Benign     | Conflicting interpretat |
| 230 | c. 512T>C   |              | Benign     | Conflicting interpretat |
| 231 | c. 509G>A   | rs80357264   | Benign     | Conflicting interpretat |
| 232 | c. 486G>A   | rs769213707  | Pathogenic | Conflicting interpretat |
| 233 | c. 484G>C   | rs55816927   | Benign     | Conflicting interpretat |
| 234 | c. 482C>T   | rs876660138  | Benign     | Conflicting interpretat |
| 235 | c. 457A>C   | rs28897674   | Benign     | Conflicting interpretat |
| 236 | c. 453T>C   | rs1555594986 | Benign     | Conflicting interpretat |
| 237 | c. 446A>C   | rs397507233  | Benign     | Conflicting interpretat |
| 238 | c. 441G>C   | rs748876625  | Benign     | Conflicting interpretat |
| 239 | c. 423A>G   | rs777102216  | Benign     | Conflicting interpretat |
| 240 | c. 398G>A   | rs80357357   | Benign     | Conflicting interpretat |
| 241 | c. 389A>T   | rs56055578   | Benign     | Conflicting interpretat |
| 242 | c. 301+1G>A | rs587782173  | Pathogenic | Conflicting interpretat |
| 243 | c. 154C>A   | rs80357084   | Pathogenic | Conflicting interpretat |
| 244 | c. 154C>T   | rs80357084   | Benign     | Conflicting interpretat |
| 245 | c. 144G>A   | rs587783040  | Pathogenic | Conflicting interpretat |
| 246 | c. 135-5T>C | rs587781916  | Benign     | Conflicting interpretat |
| 247 | c. 132C>T   | rs876658362  | Pathogenic | Conflicting interpretat |
| 248 | c. 124A>G   | rs80357163   | Benign     | Conflicting interpretat |
| 249 | c. 122A>T   | rs80357276   | Benign     | Conflicting interpretat |
| 250 | c. 121C>A   | rs1060502353 | Benign     | Conflicting interpretat |
| 251 | c. 93C>G    | rs80357000   | Pathogenic | Conflicting interpretat |
| 252 | c. 81T>C    | rs587780805  | Benign     | Conflicting interpretat |
| 253 | c. 81-6T>C  | rs80358179   | Benign     | Conflicting interpretat |
| 254 | c. 80G>A    |              | Benign     | Conflicting interpretat |
| 255 | c. 80G>T    | rs1064793052 | Benign     | Conflicting interpretat |
| 256 | c. 70T>A    |              | Benign     | Conflicting interpretat |
| 257 | c. 43A>C    | rs80357031   | Benign     | Conflicting interpretat |
| 258 | c. 22G>A    | rs528902306  | Benign     | Conflicting interpretat |
| 259 | c. 20G>A    | rs144792613  | Benign     | Conflicting interpretat |
| 260 | c. 19C>T    | rs80356994   | Benign     | Conflicting interpretat |
| 261 | c. 10T>C    | rs876658707  | Benign     | Conflicting interpretat |
| 262 | c. -10A>C   | rs748057929  | Benign     | Conflicting interpretat |
| 263 | c. -16A>G   | rs777262055  | Pathogenic | Conflicting interpretat |
| 264 | c. -20+5T>C | rs1057524628 | Benign     | Conflicting interpretat |
| 265 | c. *1286C>T | rs548275991  | Benign     | Likely benign           |
| 266 | c. *750A>G  | rs138782023  | Pathogenic | Likely benign           |
| 267 | c. *528G>C  | rs1060504556 | Pathogenic | Likely benign           |
| 268 | c. *20C>T   | rs375042815  | Benign     | Likely benign           |
| 269 | c. *4C>T    | rs1057520246 | Pathogenic | Likely benign           |

|     |               |              |            |               |
|-----|---------------|--------------|------------|---------------|
| 270 | c. *3G>T      | rs1057521525 | Benign     | Likely benign |
| 271 | c. *1C>T      | rs587782097  | Benign     | Likely benign |
| 272 | c. 5586C>T    | rs774127304  | Benign     | Likely benign |
| 273 | c. 5574C>T    | rs876659941  | Benign     | Likely benign |
| 274 | c. 5568C>G    | rs876659994  | Benign     | Likely benign |
| 275 | c. 5568C>A    | rs876659994  | Pathogenic | Likely benign |
| 276 | c. 5566C>T    | rs80357274   | Benign     | Likely benign |
| 277 | c. 5565A>C    | rs758449088  | Benign     | Likely benign |
| 278 | c. 5562G>A    | rs786201648  | Pathogenic | Likely benign |
| 279 | c. 5556C>G    | rs80356841   | Benign     | Likely benign |
| 280 | c. 5553C>T    | rs80357326   | Benign     | Likely benign |
| 281 | c. 5550G>A    | rs786201502  | Pathogenic | Likely benign |
| 282 | c. 5550G>C    | rs786201502  | Benign     | Likely benign |
| 283 | c. 5547G>A    | rs1426388214 | Pathogenic | Likely benign |
| 284 | c. 5541C>T    | rs397509295  | Benign     | Likely benign |
| 285 | c. 5538G>A    | rs80356849   | Pathogenic | Likely benign |
| 286 | c. 5532C>T    | rs80356829   | Benign     | Likely benign |
| 287 | c. 5529A>G    | rs1160863525 | Benign     | Likely benign |
| 288 | c. 5529A>C    | rs1160863525 | Benign     | Likely benign |
| 289 | c. 5526A>G    | rs1555574397 | Pathogenic | Likely benign |
| 290 | c. 5523T>C    | rs878854960  | Benign     | Likely benign |
| 291 | c. 5514G>T    | rs786201248  | Benign     | Likely benign |
| 292 | c. 5502C>T    | rs1057520459 | Benign     | Likely benign |
| 293 | c. 5496G>A    | rs1131692070 | Pathogenic | Likely benign |
| 294 | c. 5478G>A    | rs80357332   | Pathogenic | Likely benign |
| 295 | c. 5475G>T    | rs1057520941 | Benign     | Likely benign |
| 296 | c. 5475G>A    | rs1057520941 | Benign     | Likely benign |
| 297 | c. 5469A>C    |              | Benign     | Likely benign |
| 298 | c. 5468-8G>T  |              | Benign     | Likely benign |
| 299 | c. 5468-49C>T |              | Benign     | Likely benign |
| 300 | c. 5466T>C    | rs886052975  | Benign     | Likely benign |
| 301 | c. 5457T>C    |              | Benign     | Likely benign |
| 302 | c. 5456A>G    | rs80357286   | Benign     | Likely benign |
| 303 | c. 5451G>A    | rs1057523707 | Pathogenic | Likely benign |
| 304 | c. 5448A>G    | rs397509285  | Pathogenic | Likely benign |
| 305 | c. 5439T>C    | rs760396669  | Benign     | Likely benign |
| 306 | c. 5430G>A    | rs786201582  | Pathogenic | Likely benign |
| 307 | c. 5424G>C    | rs1555574748 | Benign     | Likely benign |
| 308 | c. 5418A>C    | rs1555574766 | Benign     | Likely benign |
| 309 | c. 5416C>G    | rs80357241   | Benign     | Likely benign |
| 310 | c. 5415C>T    | rs1060504559 | Benign     | Likely benign |
| 311 | c. 5412C>T    | rs730881456  | Benign     | Likely benign |
| 312 | c. 5407-17C>G |              | Benign     | Likely benign |
| 313 | c. 5406A>C    | rs879255493  | Benign     | Likely benign |
| 314 | c. 5402G>A    | rs531210457  | Benign     | Likely benign |
| 315 | c. 5397C>T    | rs1131692096 | Benign     | Likely benign |
| 316 | c. 5394C>T    | rs777371808  | Benign     | Likely benign |
| 317 | c. 5390C>T    | rs879255492  | Benign     | Likely benign |
| 318 | c. 5388A>G    | rs373810778  | Pathogenic | Likely benign |
| 319 | c. 5382G>C    | rs397509275  | Benign     | Likely benign |
| 320 | c. 5376G>A    | rs1060504569 | Pathogenic | Likely benign |
| 321 | c. 5367T>C    |              | Benign     | Likely benign |
| 322 | c. 5358G>C    | rs1057522271 | Benign     | Likely benign |
| 323 | c. 5356C>T    | rs1555575167 | Benign     | Likely benign |

|     |                |              |            |               |
|-----|----------------|--------------|------------|---------------|
| 324 | c. 5352A>T     | rs767459025  | Benign     | Likely benign |
| 325 | c. 5352A>G     | rs767459025  | Pathogenic | Likely benign |
| 326 | c. 5340G>T     |              | Benign     | Likely benign |
| 327 | c. 5340G>A     | rs766700840  | Pathogenic | Likely benign |
| 328 | c. 5337A>G     | rs876659718  | Benign     | Likely benign |
| 329 | c. 5334T>C     | rs754152768  | Benign     | Likely benign |
| 330 | c. 5333A>G     | rs80357041   | Benign     | Likely benign |
| 331 | c. 5333-12T>C  |              | Benign     | Likely benign |
| 332 | c. 5333-873T>C |              | Benign     | Likely benign |
| 333 | c. 5332+13G>T  | rs372391060  | Pathogenic | Likely benign |
| 334 | c. 5332+11G>A  |              | Pathogenic | Likely benign |
| 335 | c. 5328C>G     |              | Benign     | Likely benign |
| 336 | c. 5328C>T     | rs759867616  | Benign     | Likely benign |
| 337 | c. 5319C>G     | rs1555575689 | Benign     | Likely benign |
| 338 | c. 5313C>T     | rs1131692076 | Benign     | Likely benign |
| 339 | c. 5310G>C     | rs273901761  | Benign     | Likely benign |
| 340 | c. 5310G>A     | rs273901761  | Benign     | Likely benign |
| 341 | c. 5304C>T     | rs138493864  | Benign     | Likely benign |
| 342 | c. 5289G>A     | rs1022076404 | Pathogenic | Likely benign |
| 343 | c. 5289G>C     | rs1022076404 | Benign     | Likely benign |
| 344 | c. 5280C>T     | rs750040616  | Benign     | Likely benign |
| 345 | c. 5280C>A     | rs750040616  | Pathogenic | Likely benign |
| 346 | c. 5278-19T>A  |              | Benign     | Likely benign |
| 347 | c. 5277+98T>C  |              | Benign     | Likely benign |
| 348 | c. 5274A>G     | rs758739620  | Benign     | Likely benign |
| 349 | c. 5268G>A     | rs571834423  | Benign     | Likely benign |
| 350 | c. 5259A>G     | rs771577266  | Pathogenic | Likely benign |
| 351 | c. 5256A>C     | rs80356844   | Benign     | Likely benign |
| 352 | c. 5251C>A     | rs80357123   | Benign     | Likely benign |
| 353 | c. 5250G>A     |              | Benign     | Likely benign |
| 354 | c. 5202T>C     |              | Benign     | Likely benign |
| 355 | c. 5196T>C     | rs1567764670 | Benign     | Likely benign |
| 356 | c. 5194-34C>T  |              | Benign     | Likely benign |
| 357 | c. 5193+22C>T  | rs8176260    | Benign     | Likely benign |
| 358 | c. 5193+8C>A   |              | Benign     | Likely benign |
| 359 | c. 5193G>A     | rs876660702  | Pathogenic | Likely benign |
| 360 | c. 5185C>T     | rs1207677103 | Benign     | Likely benign |
| 361 | c. 5176A>G     | rs80357501   | Benign     | Likely benign |
| 362 | c. 5175A>G     | rs191373374  | Benign     | Likely benign |
| 363 | c. 5163G>A     | rs1403122031 | Benign     | Likely benign |
| 364 | c. 5160C>G     | rs376736915  | Benign     | Likely benign |
| 365 | c. 5157G>T     | rs28897697   | Pathogenic | Likely benign |
| 366 | c. 5157G>A     | rs28897697   | Pathogenic | Likely benign |
| 367 | c. 5153-31A>T  |              | Benign     | Likely benign |
| 368 | c. 5152+13C>T  |              | Benign     | Likely benign |
| 369 | c. 5142T>G     | rs749319480  | Benign     | Likely benign |
| 370 | c. 5139A>G     | rs1555578550 | Pathogenic | Likely benign |
| 371 | c. 5124G>A     | rs1057520432 | Pathogenic | Likely benign |
| 372 | c. 5115A>C     | rs772885662  | Benign     | Likely benign |
| 373 | c. 5113C>T     | rs80356858   | Benign     | Likely benign |
| 374 | c. 5109T>C     | rs80356974   | Benign     | Likely benign |
| 375 | c. 5103G>A     | rs1060504591 | Pathogenic | Likely benign |
| 376 | c. 5100A>G     | rs45519437   | Benign     | Likely benign |
| 377 | c. 5095C>A     | rs55770810   | Benign     | Likely benign |

|     |               |              |            |               |
|-----|---------------|--------------|------------|---------------|
| 378 | c. 5094A>G    | rs764891781  | Benign     | Likely benign |
| 379 | c. 5088G>A    | rs878854956  | Pathogenic | Likely benign |
| 380 | c. 5075-18G>T |              | Benign     | Likely benign |
| 381 | c. 5074+20A>G |              | Pathogenic | Likely benign |
| 382 | c. 5061T>C    | rs1555579625 | Benign     | Likely benign |
| 383 | c. 5058T>C    | rs397509218  | Benign     | Likely benign |
| 384 | c. 5055T>G    | rs1060504555 | Benign     | Likely benign |
| 385 | c. 5052T>G    |              | Benign     | Likely benign |
| 386 | c. 5052T>A    | rs760922019  | Benign     | Likely benign |
| 387 | c. 5052T>C    | rs760922019  | Benign     | Likely benign |
| 388 | c. 5037A>G    | rs754256578  | Pathogenic | Likely benign |
| 389 | c. 5034T>C    | rs898511378  | Benign     | Likely benign |
| 390 | c. 5031T>A    | rs765241963  | Benign     | Likely benign |
| 391 | c. 5028A>G    | rs1064793596 | Pathogenic | Likely benign |
| 392 | c. 5026T>C    | rs1567772244 | Benign     | Likely benign |
| 393 | c. 5025T>C    | rs876658226  | Benign     | Likely benign |
| 394 | c. 5023A>G    | rs774452090  | Pathogenic | Likely benign |
| 395 | c. 5022C>T    | rs786203868  | Benign     | Likely benign |
| 396 | c. 5010A>G    | rs777828258  | Benign     | Likely benign |
| 397 | c. 5008A>C    | rs1057523976 | Benign     | Likely benign |
| 398 | c. 5007C>T    | rs751856943  | Benign     | Likely benign |
| 399 | c. 5001G>A    | rs889937720  | Benign     | Likely benign |
| 400 | c. 4998C>T    | rs730882165  | Benign     | Likely benign |
| 401 | c. 4987-8A>G  |              | Pathogenic | Likely benign |
| 402 | c. 4987-20A>C |              | Benign     | Likely benign |
| 403 | c. 4977A>C    | rs1131692087 | Benign     | Likely benign |
| 404 | c. 4974C>T    | rs1555580615 | Benign     | Likely benign |
| 405 | c. 4971G>C    | rs786202058  | Benign     | Likely benign |
| 406 | c. 4971G>A    | rs786202058  | Pathogenic | Likely benign |
| 407 | c. 4962G>A    | rs549640262  | Pathogenic | Likely benign |
| 408 | c. 4959G>A    | rs878854955  | Pathogenic | Likely benign |
| 409 | c. 4930G>C    |              | Benign     | Likely benign |
| 410 | c. 4929A>C    | rs786202022  | Benign     | Likely benign |
| 411 | c. 4923T>G    | rs876658258  | Benign     | Likely benign |
| 412 | c. 4917G>A    | rs1060504558 | Pathogenic | Likely benign |
| 413 | c. 4915T>C    |              | Benign     | Likely benign |
| 414 | c. 4914A>G    | rs786201216  | Benign     | Likely benign |
| 415 | c. 4908G>A    | rs1567774705 | Pathogenic | Likely benign |
| 416 | c. 4902G>A    | rs746199881  | Benign     | Likely benign |
| 417 | c. 4899C>T    |              | Benign     | Likely benign |
| 418 | c. 4893T>C    | rs80356850   | Benign     | Likely benign |
| 419 | c. 4881A>G    | rs1425743425 | Benign     | Likely benign |
| 420 | c. 4872G>T    |              | Benign     | Likely benign |
| 421 | c. 4872G>A    | rs11555992   | Pathogenic | Likely benign |
| 422 | c. 4860T>C    | rs750938749  | Benign     | Likely benign |
| 423 | c. 4854T>C    | rs750718476  | Benign     | Likely benign |
| 424 | c. 4851T>C    | rs786202627  | Benign     | Likely benign |
| 425 | c. 4848T>C    |              | Benign     | Likely benign |
| 426 | c. 4845T>C    | rs144588397  | Benign     | Likely benign |
| 427 | c. 4833C>T    | rs80356842   | Benign     | Likely benign |
| 428 | c. 4830T>G    | rs1555580852 | Benign     | Likely benign |
| 429 | c. 4824A>G    | rs1555580860 | Pathogenic | Likely benign |
| 430 | c. 4821T>C    | rs1260740618 | Benign     | Likely benign |
| 431 | c. 4815G>A    | rs1060504589 | Pathogenic | Likely benign |



|     |               |              |            |               |
|-----|---------------|--------------|------------|---------------|
| 432 | c. 4813T>C    | rs80356833   | Benign     | Likely benign |
| 433 | c. 4803A>G    | rs886037794  | Benign     | Likely benign |
| 434 | c. 4798T>C    | rs775837744  | Benign     | Likely benign |
| 435 | c. 4791C>T    | rs1555580935 | Benign     | Likely benign |
| 436 | c. 4782A>G    | rs876659455  | Benign     | Likely benign |
| 437 | c. 4767T>A    |              | Benign     | Likely benign |
| 438 | c. 4767T>G    | rs587780864  | Benign     | Likely benign |
| 439 | c. 4764T>A    | rs753651115  | Pathogenic | Likely benign |
| 440 | c. 4764T>C    | rs753651115  | Benign     | Likely benign |
| 441 | c. 4752C>T    | rs786201422  | Benign     | Likely benign |
| 442 | c. 4750G>T    | rs80357070   | Benign     | Likely benign |
| 443 | c. 4749A>G    |              | Pathogenic | Likely benign |
| 444 | c. 4743A>G    | rs397509194  | Benign     | Likely benign |
| 445 | c. 4740T>C    | rs777297026  | Benign     | Likely benign |
| 446 | c. 4737T>C    | rs878854954  | Benign     | Likely benign |
| 447 | c. 4731T>A    | rs1555581028 | Benign     | Likely benign |
| 448 | c. 4726G>C    | rs1060502355 | Benign     | Likely benign |
| 449 | c. 4725T>G    | rs878854953  | Benign     | Likely benign |
| 450 | c. 4719T>C    | rs1057520436 | Benign     | Likely benign |
| 451 | c. 4710C>T    | rs786201839  | Benign     | Likely benign |
| 452 | c. 4690C>T    |              | Benign     | Likely benign |
| 453 | c. 4689C>T    | rs80357433   | Benign     | Likely benign |
| 454 | c. 4683C>A    | rs878853265  | Pathogenic | Likely benign |
| 455 | c. 4683C>T    | rs878853265  | Benign     | Likely benign |
| 456 | c. 4682C>T    | rs56158747   | Benign     | Likely benign |
| 457 | c. 4676-44A>C |              | Benign     | Likely benign |
| 458 | c. 4675+7T>A  |              | Benign     | Likely benign |
| 459 | c. 4665G>A    | rs878854952  | Benign     | Likely benign |
| 460 | c. 4657T>C    | rs80357431   | Benign     | Likely benign |
| 461 | c. 4653T>C    | rs587780863  | Benign     | Likely benign |
| 462 | c. 4650A>T    | rs876658608  | Benign     | Likely benign |
| 463 | c. 4650A>G    | rs876658608  | Benign     | Likely benign |
| 464 | c. 4644G>A    | rs28897692   | Benign     | Likely benign |
| 465 | c. 4635C>T    | rs373686790  | Benign     | Likely benign |
| 466 | c. 4629G>A    | rs1555581858 | Benign     | Likely benign |
| 467 | c. 4626T>C    | rs786202425  | Benign     | Likely benign |
| 468 | c. 4620A>G    | rs769566412  | Benign     | Likely benign |
| 469 | c. 4617G>A    |              | Pathogenic | Likely benign |
| 470 | c. 4614G>A    | rs1555581876 | Pathogenic | Likely benign |
| 471 | c. 4599T>C    | rs1131692095 | Benign     | Likely benign |
| 472 | c. 4596T>C    | rs1567777953 | Benign     | Likely benign |
| 473 | c. 4584C>T    | rs1131692080 | Benign     | Likely benign |
| 474 | c. 4581G>A    | rs1060504560 | Pathogenic | Likely benign |
| 475 | c. 4565A>G    | rs80357379   | Pathogenic | Likely benign |
| 476 | c. 4560A>G    | rs761293595  | Benign     | Likely benign |
| 477 | c. 4557T>C    | rs876659243  | Benign     | Likely benign |
| 478 | c. 4554G>A    | rs786202635  | Pathogenic | Likely benign |
| 479 | c. 4545G>A    | rs755731300  | Pathogenic | Likely benign |
| 480 | c. 4545G>T    | rs755731300  | Pathogenic | Likely benign |
| 481 | c. 4544G>A    | rs398122688  | Pathogenic | Likely benign |
| 482 | c. 4527C>T    | rs886040233  | Benign     | Likely benign |
| 483 | c. 4521G>A    | rs1435385135 | Pathogenic | Likely benign |
| 484 | c. 4518T>C    | rs73983787   | Benign     | Likely benign |
| 485 | c. 4515T>C    | rs1057522167 | Benign     | Likely benign |

|     |                |              |            |               |
|-----|----------------|--------------|------------|---------------|
| 486 | c. 4512A>G     | rs1555582056 | Pathogenic | Likely benign |
| 487 | c. 4506A>G     | rs778400777  | Benign     | Likely benign |
| 488 | c. 4503C>T     | rs747539984  | Benign     | Likely benign |
| 489 | c. 4491C>T     |              | Benign     | Likely benign |
| 490 | c. 4485-11T>A  |              | Benign     | Likely benign |
| 491 | c. 4485-14A>T  |              | Benign     | Likely benign |
| 492 | c. 4484+32A>G  |              | Pathogenic | Likely benign |
| 493 | c. 4443A>C     | rs1555582589 | Benign     | Likely benign |
| 494 | c. 4437G>A     | rs1232117701 | Pathogenic | Likely benign |
| 495 | c. 4428G>A     | rs1057522527 | Benign     | Likely benign |
| 496 | c. 4422T>C     | rs756281673  | Benign     | Likely benign |
| 497 | c. 4419T>A     | rs730881455  | Benign     | Likely benign |
| 498 | c. 4416T>C     | rs780239567  | Benign     | Likely benign |
| 499 | c. 4413C>T     | rs749522068  | Benign     | Likely benign |
| 500 | c. 4392T>A     | rs794727102  | Benign     | Likely benign |
| 501 | c. 4389C>T     |              | Benign     | Likely benign |
| 502 | c. 4380T>C     | rs786203100  | Benign     | Likely benign |
| 503 | c. 4368T>G     | rs1171220106 | Benign     | Likely benign |
| 504 | c. 4362A>G     |              | Pathogenic | Likely benign |
| 505 | c. 4358-10C>T  | rs80358111   | Benign     | Likely benign |
| 506 | c. 4358-20T>G  |              | Benign     | Likely benign |
| 507 | c. 4358-37G>A  |              | Pathogenic | Likely benign |
| 508 | c. 4358-48A>G  |              | Pathogenic | Likely benign |
| 509 | c. 4357+20C>T  |              | Benign     | Likely benign |
| 510 | c. 4353A>G     | rs786202387  | Benign     | Likely benign |
| 511 | c. 4347A>G     | rs80356840   | Benign     | Likely benign |
| 512 | c. 4338A>G     |              | Benign     | Likely benign |
| 513 | c. 4335A>C     | rs1555584033 | Benign     | Likely benign |
| 514 | c. 4332T>C     | rs752824502  | Benign     | Likely benign |
| 515 | c. 4328G>A     | rs4986849    | Benign     | Likely benign |
| 516 | c. 4323C>T     | rs1057523168 | Benign     | Likely benign |
| 517 | c. 4314C>G     | rs80356856   | Benign     | Likely benign |
| 518 | c. 4311T>C     | rs1131692092 | Benign     | Likely benign |
| 519 | c. 4308T>G     |              | Benign     | Likely benign |
| 520 | c. 4305C>T     | rs730881445  | Benign     | Likely benign |
| 521 | c. 4294A>C     | rs80357157   | Benign     | Likely benign |
| 522 | c. 4287C>T     | rs397509160  | Benign     | Likely benign |
| 523 | c. 4272G>A     | rs398122684  | Pathogenic | Likely benign |
| 524 | c. 4269C>T     | rs786202278  | Benign     | Likely benign |
| 525 | c. 4266G>A     | rs1555584142 | Pathogenic | Likely benign |
| 526 | c. 4263T>C     | rs1131692074 | Benign     | Likely benign |
| 527 | c. 4251G>A     | rs777057839  | Pathogenic | Likely benign |
| 528 | c. 4245A>G     | rs41293453   | Benign     | Likely benign |
| 529 | c. 4242A>G     | rs1057521982 | Pathogenic | Likely benign |
| 530 | c. 4230A>G     | rs1555584217 | Benign     | Likely benign |
| 531 | c. 4227G>A     | rs786201618  | Benign     | Likely benign |
| 532 | c. 4218G>A     | rs1800707    | Benign     | Likely benign |
| 533 | c. 4215A>T     | rs1555584242 | Benign     | Likely benign |
| 534 | c. 4212G>C     |              | Benign     | Likely benign |
| 535 | c. 4212G>A     |              | Pathogenic | Likely benign |
| 536 | c. 4209C>T     | rs786201224  | Benign     | Likely benign |
| 537 | c. 4197C>G     | rs876659552  | Benign     | Likely benign |
| 538 | c. 4191G>A     | rs1555584270 | Benign     | Likely benign |
| 539 | c. 4186-128A>T |              | Pathogenic | Likely benign |

|     |               |              |            |               |
|-----|---------------|--------------|------------|---------------|
| 540 | c. 4185+40T>G |              | Benign     | Likely benign |
| 541 | c. 4185+20G>A |              | Pathogenic | Likely benign |
| 542 | c. 4182T>C    | rs864622540  | Benign     | Likely benign |
| 543 | c. 4179C>G    | rs753735698  | Benign     | Likely benign |
| 544 | c. 4179C>T    | rs753735698  | Benign     | Likely benign |
| 545 | c. 4155A>G    | rs1057520245 | Pathogenic | Likely benign |
| 546 | c. 4146C>T    | rs1057517574 | Benign     | Likely benign |
| 547 | c. 4137T>C    | rs1057521866 | Benign     | Likely benign |
| 548 | c. 4134C>T    |              | Benign     | Likely benign |
| 549 | c. 4131C>T    | rs80356871   | Benign     | Likely benign |
| 550 | c. 4113G>T    | rs147448807  | Benign     | Likely benign |
| 551 | c. 4113G>A    | rs147448807  | Pathogenic | Likely benign |
| 552 | c. 4110T>C    | rs1131692067 | Benign     | Likely benign |
| 553 | c. 4107A>G    | rs1555586263 | Benign     | Likely benign |
| 554 | c. 4097-11T>G |              | Benign     | Likely benign |
| 555 | c. 4096+43G>A |              | Pathogenic | Likely benign |
| 556 | c. 4092C>T    | rs786201566  | Benign     | Likely benign |
| 557 | c. 4081A>G    | rs80357218   | Benign     | Likely benign |
| 558 | c. 4074G>A    | rs80356846   | Pathogenic | Likely benign |
| 559 | c. 4071A>G    | rs786201475  | Benign     | Likely benign |
| 560 | c. 4051T>C    | rs139858874  | Benign     | Likely benign |
| 561 | c. 4050C>T    | rs779507799  | Benign     | Likely benign |
| 562 | c. 4047G>T    | rs758515222  | Benign     | Likely benign |
| 563 | c. 4047G>A    | rs758515222  | Benign     | Likely benign |
| 564 | c. 4026A>C    | rs80356828   | Benign     | Likely benign |
| 565 | c. 4026A>G    | rs80356828   | Pathogenic | Likely benign |
| 566 | c. 4020G>A    |              | Pathogenic | Likely benign |
| 567 | c. 4018T>C    | rs786201646  | Benign     | Likely benign |
| 568 | c. 4014G>A    | rs1555586655 | Benign     | Likely benign |
| 569 | c. 4002T>C    | rs1131692083 | Benign     | Likely benign |
| 570 | c. 3995G>A    |              | Pathogenic | Likely benign |
| 571 | c. 3993G>A    | rs70953658   | Pathogenic | Likely benign |
| 572 | c. 3990C>T    | rs876660808  | Benign     | Likely benign |
| 573 | c. 3975G>A    | rs761424661  | Benign     | Likely benign |
| 574 | c. 3960T>C    |              | Benign     | Likely benign |
| 575 | c. 3951G>A    | rs1060504566 | Pathogenic | Likely benign |
| 576 | c. 3936C>T    | rs753210219  | Benign     | Likely benign |
| 577 | c. 3935C>G    | rs1555586769 | Benign     | Likely benign |
| 578 | c. 3930A>C    | rs1555586780 | Benign     | Likely benign |
| 579 | c. 3918G>A    | rs786202068  | Pathogenic | Likely benign |
| 580 | c. 3909G>A    |              | Pathogenic | Likely benign |
| 581 | c. 3900C>T    | rs730881454  | Pathogenic | Likely benign |
| 582 | c. 3897G>A    | rs398122678  | Pathogenic | Likely benign |
| 583 | c. 3891T>C    | rs1555586847 | Benign     | Likely benign |
| 584 | c. 3885G>A    | rs1057522176 | Pathogenic | Likely benign |
| 585 | c. 3879T>C    | rs1057523579 | Benign     | Likely benign |
| 586 | c. 3867A>G    |              | Benign     | Likely benign |
| 587 | c. 3858T>C    | rs794726998  | Benign     | Likely benign |
| 588 | c. 3852C>T    | rs776070899  | Benign     | Likely benign |
| 589 | c. 3849T>C    | rs1567789838 | Benign     | Likely benign |
| 590 | c. 3846A>G    | rs1555586947 | Benign     | Likely benign |
| 591 | c. 3834G>A    | rs876660942  | Benign     | Likely benign |
| 592 | c. 3826T>G    | rs876659178  | Benign     | Likely benign |
| 593 | c. 3826T>C    | rs876659178  | Benign     | Likely benign |

|     |            |              |            |               |
|-----|------------|--------------|------------|---------------|
| 594 | c. 3822A>C | rs372396487  | Benign     | Likely benign |
| 595 | c. 3810C>T | rs886040166  | Pathogenic | Likely benign |
| 596 | c. 3807C>T | rs786202569  | Benign     | Likely benign |
| 597 | c. 3804T>C | rs140588714  | Benign     | Likely benign |
| 598 | c. 3799T>C |              | Benign     | Likely benign |
| 599 | c. 3798C>T | rs200648498  | Benign     | Likely benign |
| 600 | c. 3792G>A | rs894781955  | Pathogenic | Likely benign |
| 601 | c. 3789G>A |              | Pathogenic | Likely benign |
| 602 | c. 3787T>C | rs1057523961 | Benign     | Likely benign |
| 603 | c. 3783A>G | rs80356831   | Pathogenic | Likely benign |
| 604 | c. 3780A>G | rs753081589  | Pathogenic | Likely benign |
| 605 | c. 3774G>A | rs431825399  | Pathogenic | Likely benign |
| 606 | c. 3771G>A |              | Pathogenic | Likely benign |
| 607 | c. 3768A>G | rs786202803  | Pathogenic | Likely benign |
| 608 | c. 3759T>G | rs80356852   | Benign     | Likely benign |
| 609 | c. 3756G>C | rs752122039  | Benign     | Likely benign |
| 610 | c. 3756G>A | rs752122039  | Pathogenic | Likely benign |
| 611 | c. 3750G>A | rs145903082  | Pathogenic | Likely benign |
| 612 | c. 3747C>A |              | Benign     | Likely benign |
| 613 | c. 3747C>G | rs587780801  | Benign     | Likely benign |
| 614 | c. 3747C>T | rs587780801  | Benign     | Likely benign |
| 615 | c. 3744T>A | rs1555587190 | Pathogenic | Likely benign |
| 616 | c. 3738C>T | rs778655093  | Benign     | Likely benign |
| 617 | c. 3735C>T | rs1567790391 | Benign     | Likely benign |
| 618 | c. 3726T>C | rs1060504567 | Benign     | Likely benign |
| 619 | c. 3723T>C | rs772759939  | Benign     | Likely benign |
| 620 | c. 3720G>A | rs876658341  | Benign     | Likely benign |
| 621 | c. 3717T>C |              | Benign     | Likely benign |
| 622 | c. 3717T>A | rs730881453  | Benign     | Likely benign |
| 623 | c. 3714T>G |              | Benign     | Likely benign |
| 624 | c. 3714T>C | rs140777892  | Benign     | Likely benign |
| 625 | c. 3708T>C | rs28897687   | Benign     | Likely benign |
| 626 | c. 3702A>G | rs587780862  | Pathogenic | Likely benign |
| 627 | c. 3699A>G | rs368690455  | Benign     | Likely benign |
| 628 | c. 3690A>G |              | Pathogenic | Likely benign |
| 629 | c. 3688T>C | rs786201581  | Benign     | Likely benign |
| 630 | c. 3685T>C | rs767958299  | Benign     | Likely benign |
| 631 | c. 3672C>T |              | Benign     | Likely benign |
| 632 | c. 3672C>G | rs1555587298 | Benign     | Likely benign |
| 633 | c. 3657G>A | rs80356876   | Pathogenic | Likely benign |
| 634 | c. 3645C>T | rs758329415  | Benign     | Likely benign |
| 635 | c. 3642G>A | rs398122675  | Pathogenic | Likely benign |
| 636 | c. 3636A>T | rs148038877  | Pathogenic | Likely benign |
| 637 | c. 3636A>G | rs148038877  | Pathogenic | Likely benign |
| 638 | c. 3627A>G | rs770579978  | Pathogenic | Likely benign |
| 639 | c. 3621G>A |              | Pathogenic | Likely benign |
| 640 | c. 3615G>A | rs750113197  | Benign     | Likely benign |
| 641 | c. 3612A>G | rs537737635  | Pathogenic | Likely benign |
| 642 | c. 3606C>T |              | Benign     | Likely benign |
| 643 | c. 3603T>C | rs80356830   | Benign     | Likely benign |
| 644 | c. 3603T>G | rs80356830   | Benign     | Likely benign |
| 645 | c. 3601G>A | rs55725337   | Pathogenic | Likely benign |
| 646 | c. 3600G>C | rs56214134   | Benign     | Likely benign |
| 647 | c. 3597T>A | rs1555587434 | Pathogenic | Likely benign |

|     |            |              |            |               |
|-----|------------|--------------|------------|---------------|
| 648 | c. 3588A>C | rs876658595  | Benign     | Likely benign |
| 649 | c. 3588A>G | rs876658595  | Benign     | Likely benign |
| 650 | c. 3582C>T | rs786202722  | Benign     | Likely benign |
| 651 | c. 3576T>C | rs766447664  | Benign     | Likely benign |
| 652 | c. 3573C>T | rs864622080  | Benign     | Likely benign |
| 653 | c. 3561C>T | rs1555587501 | Benign     | Likely benign |
| 654 | c. 3551G>A | rs1567791181 | Pathogenic | Likely benign |
| 655 | c. 3540C>T | rs928545955  | Benign     | Likely benign |
| 656 | c. 3537A>G | rs1131692090 | Benign     | Likely benign |
| 657 | c. 3531T>C |              | Benign     | Likely benign |
| 658 | c. 3525T>G | rs1131692086 | Benign     | Likely benign |
| 659 | c. 3519T>C |              | Benign     | Likely benign |
| 660 | c. 3513G>A | rs786202844  | Benign     | Likely benign |
| 661 | c. 3498T>C | rs1298897645 | Benign     | Likely benign |
| 662 | c. 3495T>C | rs1555587585 | Benign     | Likely benign |
| 663 | c. 3486T>C | rs1555587617 | Benign     | Likely benign |
| 664 | c. 3474A>G | rs1567791508 | Benign     | Likely benign |
| 665 | c. 3468T>C | rs864622146  | Benign     | Likely benign |
| 666 | c. 3465T>C | rs1567791539 | Benign     | Likely benign |
| 667 | c. 3462A>G | rs876659048  | Pathogenic | Likely benign |
| 668 | c. 3438T>C | rs1555587693 | Benign     | Likely benign |
| 669 | c. 3435T>C | rs786201222  | Benign     | Likely benign |
| 670 | c. 3426A>G | rs80356843   | Benign     | Likely benign |
| 671 | c. 3423T>C | rs863224419  | Benign     | Likely benign |
| 672 | c. 3402A>G | rs752875919  | Benign     | Likely benign |
| 673 | c. 3396C>T | rs764013144  | Benign     | Likely benign |
| 674 | c. 3390A>G | rs757237039  | Pathogenic | Likely benign |
| 675 | c. 3381T>C | rs781319410  | Benign     | Likely benign |
| 676 | c. 3378A>G | rs1057521325 | Benign     | Likely benign |
| 677 | c. 3372C>T | rs786203431  | Benign     | Likely benign |
| 678 | c. 3357T>C | rs772383323  | Benign     | Likely benign |
| 679 | c. 3357T>A | rs772383323  | Benign     | Likely benign |
| 680 | c. 3354G>A | rs80357334   | Pathogenic | Likely benign |
| 681 | c. 3348A>G | rs1131692073 | Pathogenic | Likely benign |
| 682 | c. 3339T>C | rs80357421   | Benign     | Likely benign |
| 683 | c. 3327A>G | rs41293449   | Benign     | Likely benign |
| 684 | c. 3315T>C |              | Benign     | Likely benign |
| 685 | c. 3312G>A | rs876659024  | Pathogenic | Likely benign |
| 686 | c. 3306T>C | rs876658664  | Benign     | Likely benign |
| 687 | c. 3279C>G | rs1567792257 | Benign     | Likely benign |
| 688 | c. 3270A>G | rs369925993  | Benign     | Likely benign |
| 689 | c. 3267G>A | rs767544239  | Pathogenic | Likely benign |
| 690 | c. 3252T>G | rs1567792354 | Benign     | Likely benign |
| 691 | c. 3246T>A |              | Pathogenic | Likely benign |
| 692 | c. 3243T>C | rs876659805  | Benign     | Likely benign |
| 693 | c. 3238T>C | rs754597283  | Benign     | Likely benign |
| 694 | c. 3237A>G | rs1555588126 | Benign     | Likely benign |
| 695 | c. 3234A>G | rs876660522  | Benign     | Likely benign |
| 696 | c. 3231G>A | rs1567792423 | Benign     | Likely benign |
| 697 | c. 3213A>G | rs528254652  | Benign     | Likely benign |
| 698 | c. 3210A>T | rs1131692068 | Pathogenic | Likely benign |
| 699 | c. 3198A>G |              | Benign     | Likely benign |
| 700 | c. 3189C>T |              | Benign     | Likely benign |
| 701 | c. 3171T>C | rs746394738  | Benign     | Likely benign |



|     |            |              |            |               |
|-----|------------|--------------|------------|---------------|
| 702 | c. 3165C>T | rs1399306338 | Benign     | Likely benign |
| 703 | c. 3153T>C | rs1057521053 | Benign     | Likely benign |
| 704 | c. 3144T>C | rs80356837   | Benign     | Likely benign |
| 705 | c. 3141A>G |              | Pathogenic | Likely benign |
| 706 | c. 3129T>C | rs1555588339 | Benign     | Likely benign |
| 707 | c. 3093T>A | rs786204265  | Benign     | Likely benign |
| 708 | c. 3090C>T | rs1221088119 | Benign     | Likely benign |
| 709 | c. 3084T>C |              | Benign     | Likely benign |
| 710 | c. 3075A>C | rs786201258  | Benign     | Likely benign |
| 711 | c. 3072C>T |              | Benign     | Likely benign |
| 712 | c. 3069G>A | rs1131692091 | Pathogenic | Likely benign |
| 713 | c. 3066A>T | rs1555588441 | Pathogenic | Likely benign |
| 714 | c. 3063T>C | rs1364539273 | Benign     | Likely benign |
| 715 | c. 3060A>G | rs781435355  | Benign     | Likely benign |
| 716 | c. 3054C>T | rs1429701835 | Benign     | Likely benign |
| 717 | c. 3045A>C | rs1131692079 | Benign     | Likely benign |
| 718 | c. 3033A>G |              | Benign     | Likely benign |
| 719 | c. 3030T>G | rs876660048  | Benign     | Likely benign |
| 720 | c. 3021A>G | rs1057521025 | Pathogenic | Likely benign |
| 721 | c. 3018T>C | rs1567793232 | Benign     | Likely benign |
| 722 | c. 3012G>A | rs786201784  | Pathogenic | Likely benign |
| 723 | c. 3009T>C | rs786201587  | Benign     | Likely benign |
| 724 | c. 3003A>G | rs774644946  | Benign     | Likely benign |
| 725 | c. 2995C>T | rs80356848   | Benign     | Likely benign |
| 726 | c. 2985G>A | rs1555588591 | Pathogenic | Likely benign |
| 727 | c. 2979A>G | rs772854836  | Benign     | Likely benign |
| 728 | c. 2943A>T | rs587780799  | Benign     | Likely benign |
| 729 | c. 2937T>C |              | Benign     | Likely benign |
| 730 | c. 2931A>C | rs273899691  | Benign     | Likely benign |
| 731 | c. 2931A>G | rs273899691  | Benign     | Likely benign |
| 732 | c. 2920T>C | rs763845063  | Benign     | Likely benign |
| 733 | c. 2913T>C | rs786203804  | Benign     | Likely benign |
| 734 | c. 2910A>G | rs431825394  | Benign     | Likely benign |
| 735 | c. 2900C>T |              | Benign     | Likely benign |
| 736 | c. 2898T>C | rs786202249  | Benign     | Likely benign |
| 737 | c. 2895C>T | rs1555588774 | Benign     | Likely benign |
| 738 | c. 2892A>G | rs1060504553 | Benign     | Likely benign |
| 739 | c. 2891G>A |              | Pathogenic | Likely benign |
| 740 | c. 2889T>C | rs876659125  | Benign     | Likely benign |
| 741 | c. 2883C>T | rs201190540  | Benign     | Likely benign |
| 742 | c. 2877A>G | rs587782743  | Pathogenic | Likely benign |
| 743 | c. 2874C>T | rs1029207537 | Benign     | Likely benign |
| 744 | c. 2865A>G | rs748285767  | Pathogenic | Likely benign |
| 745 | c. 2865A>T | rs748285767  | Benign     | Likely benign |
| 746 | c. 2862A>C | rs559190752  | Benign     | Likely benign |
| 747 | c. 2862A>G | rs559190752  | Pathogenic | Likely benign |
| 748 | c. 2860C>T | rs730881452  | Benign     | Likely benign |
| 749 | c. 2859T>C |              | Benign     | Likely benign |
| 750 | c. 2851A>C | rs1347533994 | Benign     | Likely benign |
| 751 | c. 2847C>T | rs1555588850 | Benign     | Likely benign |
| 752 | c. 2829A>G | rs1131692088 | Benign     | Likely benign |
| 753 | c. 2823T>C |              | Benign     | Likely benign |
| 754 | c. 2814A>C | rs80356851   | Benign     | Likely benign |
| 755 | c. 2811G>A | rs876659271  | Pathogenic | Likely benign |

|     |            |              |            |               |
|-----|------------|--------------|------------|---------------|
| 756 | c. 2793G>A | rs876660555  | Pathogenic | Likely benign |
| 757 | c. 2790T>C | rs876659151  | Benign     | Likely benign |
| 758 | c. 2775C>T | rs786201104  | Benign     | Likely benign |
| 759 | c. 2763G>A | rs1057522511 | Pathogenic | Likely benign |
| 760 | c. 2757T>C | rs755516286  | Benign     | Likely benign |
| 761 | c. 2745T>G | rs876658748  | Benign     | Likely benign |
| 762 | c. 2742G>A | rs961042365  | Benign     | Likely benign |
| 763 | c. 2739T>C | rs273899688  | Benign     | Likely benign |
| 764 | c. 2733A>G | rs1800740    | Benign     | Likely benign |
| 765 | c. 2727T>C | rs1057520470 | Benign     | Likely benign |
| 766 | c. 2721A>G | rs1567794510 | Benign     | Likely benign |
| 767 | c. 2712A>G | rs1057522242 | Benign     | Likely benign |
| 768 | c. 2706A>G | rs398122665  | Benign     | Likely benign |
| 769 | c. 2682A>G | rs1131692093 | Benign     | Likely benign |
| 770 | c. 2679G>A | rs587781771  | Pathogenic | Likely benign |
| 771 | c. 2674T>C | rs137998759  | Benign     | Likely benign |
| 772 | c. 2670G>T | rs786201677  | Benign     | Likely benign |
| 773 | c. 2667T>C | rs1057521536 | Benign     | Likely benign |
| 774 | c. 2664C>T |              | Benign     | Likely benign |
| 775 | c. 2661C>G |              | Benign     | Likely benign |
| 776 | c. 2658T>G | rs1555589207 | Benign     | Likely benign |
| 777 | c. 2634A>G | rs730881451  | Pathogenic | Likely benign |
| 778 | c. 2625A>G | rs754222140  | Pathogenic | Likely benign |
| 779 | c. 2625A>T | rs754222140  | Pathogenic | Likely benign |
| 780 | c. 2622T>C |              | Benign     | Likely benign |
| 781 | c. 2619A>T |              | Pathogenic | Likely benign |
| 782 | c. 2613G>A | rs587782608  | Benign     | Likely benign |
| 783 | c. 2604A>C | rs864622491  | Benign     | Likely benign |
| 784 | c. 2601G>A | rs876659166  | Benign     | Likely benign |
| 785 | c. 2595G>A |              | Pathogenic | Likely benign |
| 786 | c. 2583C>T | rs1555589334 | Pathogenic | Likely benign |
| 787 | c. 2580A>C | rs556684572  | Benign     | Likely benign |
| 788 | c. 2580A>G | rs556684572  | Benign     | Likely benign |
| 789 | c. 2577T>C | rs1555589344 | Benign     | Likely benign |
| 790 | c. 2574G>A | rs1555589357 | Pathogenic | Likely benign |
| 791 | c. 2571G>A |              | Pathogenic | Likely benign |
| 792 | c. 2569T>C | rs779895958  | Benign     | Likely benign |
| 793 | c. 2568T>C | rs80356832   | Benign     | Likely benign |
| 794 | c. 2565G>A |              | Pathogenic | Likely benign |
| 795 | c. 2556T>C | rs1555589414 | Benign     | Likely benign |
| 796 | c. 2535A>C | rs876660248  | Benign     | Likely benign |
| 797 | c. 2523G>C | rs773013395  | Benign     | Likely benign |
| 798 | c. 2523G>A | rs773013395  | Benign     | Likely benign |
| 799 | c. 2522G>A | rs80357337   | Benign     | Likely benign |
| 800 | c. 2497T>C | rs887578121  | Benign     | Likely benign |
| 801 | c. 2496A>T | rs767666029  | Benign     | Likely benign |
| 802 | c. 2475C>T | rs1060504581 | Benign     | Likely benign |
| 803 | c. 2472T>C | rs786201415  | Benign     | Likely benign |
| 804 | c. 2466T>C | rs1064794701 | Benign     | Likely benign |
| 805 | c. 2440C>T | rs786202054  | Benign     | Likely benign |
| 806 | c. 2433C>T | rs1555589666 | Benign     | Likely benign |
| 807 | c. 2421A>G | rs772960140  | Pathogenic | Likely benign |
| 808 | c. 2412G>A | rs55746541   | Pathogenic | Likely benign |
| 809 | c. 2409T>C | rs1555589731 | Benign     | Likely benign |

|     |            |              |            |               |
|-----|------------|--------------|------------|---------------|
| 810 | c. 2376G>A |              | Pathogenic | Likely benign |
| 811 | c. 2374G>A | rs1555589778 | Pathogenic | Likely benign |
| 812 | c. 2352G>C |              | Benign     | Likely benign |
| 813 | c. 2352G>A | rs372017932  | Benign     | Likely benign |
| 814 | c. 2340G>A | rs1555589856 | Pathogenic | Likely benign |
| 815 | c. 2334C>T | rs777404687  | Benign     | Likely benign |
| 816 | c. 2322T>A | rs397508958  | Pathogenic | Likely benign |
| 817 | c. 2316A>C | rs876658590  | Benign     | Likely benign |
| 818 | c. 2310A>G |              | Pathogenic | Likely benign |
| 819 | c. 2295G>A | rs201875054  | Pathogenic | Likely benign |
| 820 | c. 2292A>G | rs1555589969 | Pathogenic | Likely benign |
| 821 | c. 2289T>C | rs1567796270 | Benign     | Likely benign |
| 822 | c. 2284A>C | rs1555589988 | Benign     | Likely benign |
| 823 | c. 2274G>A | rs876660823  | Pathogenic | Likely benign |
| 824 | c. 2247T>C | rs1289739423 | Benign     | Likely benign |
| 825 | c. 2241C>T |              | Benign     | Likely benign |
| 826 | c. 2232T>G | rs4986846    | Benign     | Likely benign |
| 827 | c. 2230G>A | rs786203435  | Pathogenic | Likely benign |
| 828 | c. 2223T>C | rs1555590129 | Benign     | Likely benign |
| 829 | c. 2217A>G | rs200521980  | Benign     | Likely benign |
| 830 | c. 2214T>C |              | Benign     | Likely benign |
| 831 | c. 2207A>G | rs397507196  | Benign     | Likely benign |
| 832 | c. 2205A>G | rs1555590208 | Pathogenic | Likely benign |
| 833 | c. 2203C>T | rs587781781  | Benign     | Likely benign |
| 834 | c. 2190A>G | rs1555590252 | Benign     | Likely benign |
| 835 | c. 2187A>G |              | Benign     | Likely benign |
| 836 | c. 2178T>A | rs1555590270 | Benign     | Likely benign |
| 837 | c. 2177T>C | rs1135401827 | Benign     | Likely benign |
| 838 | c. 2175C>T | rs273898680  | Benign     | Likely benign |
| 839 | c. 2157A>G |              | Benign     | Likely benign |
| 840 | c. 2154T>G | rs779227326  | Benign     | Likely benign |
| 841 | c. 2142T>C | rs1057522371 | Benign     | Likely benign |
| 842 | c. 2139A>G |              | Pathogenic | Likely benign |
| 843 | c. 2139A>C | rs1131692089 | Benign     | Likely benign |
| 844 | c. 2133G>A | rs1567796898 | Pathogenic | Likely benign |
| 845 | c. 2130T>G | rs273898678  | Benign     | Likely benign |
| 846 | c. 2127T>C |              | Benign     | Likely benign |
| 847 | c. 2121T>G | rs786201649  | Benign     | Likely benign |
| 848 | c. 2115A>G | rs1131692099 | Benign     | Likely benign |
| 849 | c. 2115A>T | rs1131692099 | Benign     | Likely benign |
| 850 | c. 2109A>C | rs4986844    | Benign     | Likely benign |
| 851 | c. 2103G>A | rs273898677  | Benign     | Likely benign |
| 852 | c. 2094A>T | rs1131692098 | Pathogenic | Likely benign |
| 853 | c. 2079C>T | rs80356835   | Benign     | Likely benign |
| 854 | c. 2076T>C | rs587782595  | Benign     | Likely benign |
| 855 | c. 2064A>T |              | Pathogenic | Likely benign |
| 856 | c. 2064A>G | rs1131692077 | Benign     | Likely benign |
| 857 | c. 2055T>C | rs1555590600 | Benign     | Likely benign |
| 858 | c. 2049G>A | rs778215185  | Pathogenic | Likely benign |
| 859 | c. 2037G>A | rs572835027  | Pathogenic | Likely benign |
| 860 | c. 2028T>G |              | Benign     | Likely benign |
| 861 | c. 2022T>G | rs771519405  | Benign     | Likely benign |
| 862 | c. 2016A>G | rs776542749  | Benign     | Likely benign |
| 863 | c. 2004C>T | rs1057520832 | Benign     | Likely benign |

|     |            |              |            |               |
|-----|------------|--------------|------------|---------------|
| 864 | c. 2004C>A | rs1057520832 | Pathogenic | Likely benign |
| 865 | c. 2001A>G | rs878854937  | Benign     | Likely benign |
| 866 | c. 1998A>G | rs864622452  | Pathogenic | Likely benign |
| 867 | c. 1996C>T |              | Benign     | Likely benign |
| 868 | c. 1989C>T |              | Benign     | Likely benign |
| 869 | c. 1986C>T | rs1555590719 | Benign     | Likely benign |
| 870 | c. 1983G>A | rs869320788  | Benign     | Likely benign |
| 871 | c. 1968C>T | rs1131692075 | Benign     | Likely benign |
| 872 | c. 1966A>G | rs786203455  | Benign     | Likely benign |
| 873 | c. 1962G>A |              | Pathogenic | Likely benign |
| 874 | c. 1959A>G | rs767530204  | Benign     | Likely benign |
| 875 | c. 1950A>T | rs1060504579 | Benign     | Likely benign |
| 876 | c. 1947G>A | rs755706172  | Pathogenic | Likely benign |
| 877 | c. 1944A>G | rs876660781  | Benign     | Likely benign |
| 878 | c. 1926T>C | rs786203720  | Benign     | Likely benign |
| 879 | c. 1917G>A | rs786202103  | Pathogenic | Likely benign |
| 880 | c. 1912G>A | rs80357005   | Pathogenic | Likely benign |
| 881 | c. 1911T>C | rs62625305   | Benign     | Likely benign |
| 882 | c. 1905T>C | rs369373293  | Benign     | Likely benign |
| 883 | c. 1893A>C | rs80356834   | Benign     | Likely benign |
| 884 | c. 1893A>G | rs80356834   | Pathogenic | Likely benign |
| 885 | c. 1884T>C |              | Benign     | Likely benign |
| 886 | c. 1881C>T | rs80356838   | Benign     | Likely benign |
| 887 | c. 1878A>G | rs8176154    | Pathogenic | Likely benign |
| 888 | c. 1875A>G | rs786201429  | Pathogenic | Likely benign |
| 889 | c. 1873C>T | rs769044421  | Benign     | Likely benign |
| 890 | c. 1866G>A | rs1800064    | Benign     | Likely benign |
| 891 | c. 1866G>T | rs1800064    | Benign     | Likely benign |
| 892 | c. 1863T>C | rs786201460  | Benign     | Likely benign |
| 893 | c. 1854G>A | rs1060504585 | Benign     | Likely benign |
| 894 | c. 1851C>G | rs1555591097 | Benign     | Likely benign |
| 895 | c. 1842G>A | rs760109939  | Benign     | Likely benign |
| 896 | c. 1839G>A | rs759157605  | Benign     | Likely benign |
| 897 | c. 1833G>A | rs786201548  | Pathogenic | Likely benign |
| 898 | c. 1830G>A | rs587780796  | Benign     | Likely benign |
| 899 | c. 1827T>C | rs757657445  | Benign     | Likely benign |
| 900 | c. 1809A>C |              | Benign     | Likely benign |
| 901 | c. 1803C>T | rs1057523373 | Benign     | Likely benign |
| 902 | c. 1797T>C | rs756211343  | Benign     | Likely benign |
| 903 | c. 1794A>G | rs876659644  | Pathogenic | Likely benign |
| 904 | c. 1792T>C | rs1060504554 | Benign     | Likely benign |
| 905 | c. 1788C>T | rs779253414  | Benign     | Likely benign |
| 906 | c. 1779T>C | rs1060504563 | Benign     | Likely benign |
| 907 | c. 1776C>T | rs876658911  | Pathogenic | Likely benign |
| 908 | c. 1773A>C | rs1555591259 | Benign     | Likely benign |
| 909 | c. 1764C>T |              | Benign     | Likely benign |
| 910 | c. 1761A>C | rs1057523389 | Benign     | Likely benign |
| 911 | c. 1758T>C | rs1567798401 | Benign     | Likely benign |
| 912 | c. 1752T>A |              | Benign     | Likely benign |
| 913 | c. 1752T>C |              | Benign     | Likely benign |
| 914 | c. 1749A>G | rs876659580  | Benign     | Likely benign |
| 915 | c. 1746G>A | rs776115545  | Benign     | Likely benign |
| 916 | c. 1740C>T | rs1057520244 | Pathogenic | Likely benign |
| 917 | c. 1737T>G | rs1567798463 | Benign     | Likely benign |

|     |            |              |            |               |
|-----|------------|--------------|------------|---------------|
| 918 | c. 1731A>G | rs28897678   | Benign     | Likely benign |
| 919 | c. 1728A>G | rs786201232  | Benign     | Likely benign |
| 920 | c. 1722C>T | rs530914551  | Benign     | Likely benign |
| 921 | c. 1710A>G | rs876659901  | Benign     | Likely benign |
| 922 | c. 1707C>T | rs876659110  | Benign     | Likely benign |
| 923 | c. 1704T>C | rs587780795  | Benign     | Likely benign |
| 924 | c. 1704T>G | rs587780795  | Benign     | Likely benign |
| 925 | c. 1650T>C | rs777595821  | Benign     | Likely benign |
| 926 | c. 1635G>A | rs770842236  | Pathogenic | Likely benign |
| 927 | c. 1632A>G | rs876658401  | Benign     | Likely benign |
| 928 | c. 1617G>A | rs372002119  | Benign     | Likely benign |
| 929 | c. 1608T>G | rs1555591482 | Benign     | Likely benign |
| 930 | c. 1599T>C |              | Benign     | Likely benign |
| 931 | c. 1596A>T | rs1555591508 | Benign     | Likely benign |
| 932 | c. 1587T>C |              | Benign     | Likely benign |
| 933 | c. 1578A>G | rs762642319  | Benign     | Likely benign |
| 934 | c. 1569G>A | rs766934857  | Pathogenic | Likely benign |
| 935 | c. 1567T>C | rs754398271  | Benign     | Likely benign |
| 936 | c. 1563A>G | rs754970915  | Pathogenic | Likely benign |
| 937 | c. 1536T>C |              | Benign     | Likely benign |
| 938 | c. 1533C>G |              | Benign     | Likely benign |
| 939 | c. 1533C>A | rs1280391272 | Benign     | Likely benign |
| 940 | c. 1530A>T | rs1555591599 | Pathogenic | Likely benign |
| 941 | c. 1527A>G | rs1131692082 | Benign     | Likely benign |
| 942 | c. 1524T>C | rs200616937  | Benign     | Likely benign |
| 943 | c. 1524T>G | rs200616937  | Benign     | Likely benign |
| 944 | c. 1522C>G | rs1555591622 | Benign     | Likely benign |
| 945 | c. 1506A>G | rs786203671  | Pathogenic | Likely benign |
| 946 | c. 1500T>C |              | Benign     | Likely benign |
| 947 | c. 1497A>T |              | Pathogenic | Likely benign |
| 948 | c. 1491C>G | rs786202374  | Benign     | Likely benign |
| 949 | c. 1487G>T | rs28897677   | Benign     | Likely benign |
| 950 | c. 1470A>G | rs775032066  | Benign     | Likely benign |
| 951 | c. 1467G>A | rs794726997  | Pathogenic | Likely benign |
| 952 | c. 1464T>C | rs1555591722 | Benign     | Likely benign |
| 953 | c. 1458T>A | rs80357400   | Benign     | Likely benign |
| 954 | c. 1446T>C |              | Benign     | Likely benign |
| 955 | c. 1434T>G | rs876658280  | Benign     | Likely benign |
| 956 | c. 1428T>C | rs1060504572 | Benign     | Likely benign |
| 957 | c. 1427A>G | rs55720177   | Benign     | Likely benign |
| 958 | c. 1421T>C |              | Benign     | Likely benign |
| 959 | c. 1419C>T | rs777228325  | Benign     | Likely benign |
| 960 | c. 1416C>T | rs752808917  | Benign     | Likely benign |
| 961 | c. 1404G>A | rs1555591782 | Pathogenic | Likely benign |
| 962 | c. 1401G>A | rs786201323  | Pathogenic | Likely benign |
| 963 | c. 1398G>A | rs1060504571 | Benign     | Likely benign |
| 964 | c. 1392C>G | rs533802049  | Benign     | Likely benign |
| 965 | c. 1390A>G | rs869320787  | Benign     | Likely benign |
| 966 | c. 1386G>A | rs876659749  | Pathogenic | Likely benign |
| 967 | c. 1374C>T | rs879253999  | Benign     | Likely benign |
| 968 | c. 1362T>C | rs1555591854 | Benign     | Likely benign |
| 969 | c. 1353A>G | rs1178888270 | Pathogenic | Likely benign |
| 970 | c. 1344C>T | rs1395644015 | Benign     | Likely benign |
| 971 | c. 1336A>C |              | Benign     | Likely benign |



|      |            |              |            |               |
|------|------------|--------------|------------|---------------|
| 972  | c. 1335A>G | rs1131692094 | Benign     | Likely benign |
| 973  | c. 1329A>G | rs771892131  | Benign     | Likely benign |
| 974  | c. 1317T>C | rs1555591949 | Benign     | Likely benign |
| 975  | c. 1308T>C | rs770279083  | Benign     | Likely benign |
| 976  | c. 1302T>C |              | Benign     | Likely benign |
| 977  | c. 1294C>T | rs864622454  | Benign     | Likely benign |
| 978  | c. 1284A>G |              | Benign     | Likely benign |
| 979  | c. 1278A>C | rs1442003131 | Benign     | Likely benign |
| 980  | c. 1278A>G | rs1442003131 | Pathogenic | Likely benign |
| 981  | c. 1275T>A | rs786201160  | Benign     | Likely benign |
| 982  | c. 1260T>C |              | Benign     | Likely benign |
| 983  | c. 1257A>G | rs751690840  | Pathogenic | Likely benign |
| 984  | c. 1257A>T | rs751690840  | Pathogenic | Likely benign |
| 985  | c. 1254G>A | rs786201948  | Pathogenic | Likely benign |
| 986  | c. 1251T>C | rs80357197   | Benign     | Likely benign |
| 987  | c. 1248A>G | rs1057522369 | Pathogenic | Likely benign |
| 988  | c. 1242C>T | rs372400428  | Benign     | Likely benign |
| 989  | c. 1237T>G | rs574008372  | Benign     | Likely benign |
| 990  | c. 1237T>C | rs574008372  | Benign     | Likely benign |
| 991  | c. 1236A>G | rs1555592094 | Pathogenic | Likely benign |
| 992  | c. 1233T>G | rs80357024   | Benign     | Likely benign |
| 993  | c. 1227A>G | rs149349675  | Pathogenic | Likely benign |
| 994  | c. 1215A>G | rs786201517  | Pathogenic | Likely benign |
| 995  | c. 1212A>G | rs1057521863 | Benign     | Likely benign |
| 996  | c. 1209T>C | rs369363742  | Benign     | Likely benign |
| 997  | c. 1203G>A | rs1567800556 | Benign     | Likely benign |
| 998  | c. 1197T>C | rs1555592250 | Benign     | Likely benign |
| 999  | c. 1173A>G | rs1131692097 | Benign     | Likely benign |
| 1000 | c. 1161C>T |              | Benign     | Likely benign |
| 1001 | c. 1152G>A | rs1057523704 | Pathogenic | Likely benign |
| 1002 | c. 1149T>C | rs979531844  | Benign     | Likely benign |
| 1003 | c. 1137T>G | rs56128296   | Pathogenic | Likely benign |
| 1004 | c. 1128T>C | rs1555592423 | Benign     | Likely benign |
| 1005 | c. 1125A>G | rs1060504578 | Pathogenic | Likely benign |
| 1006 | c. 1123C>T | rs1131692084 | Benign     | Likely benign |
| 1007 | c. 1113T>C | rs876658619  | Benign     | Likely benign |
| 1008 | c. 1098T>C | rs876658148  | Benign     | Likely benign |
| 1009 | c. 1092T>C | rs1555592521 | Benign     | Likely benign |
| 1010 | c. 1072C>T | rs377310179  | Benign     | Likely benign |
| 1011 | c. 1071A>G | rs786202159  | Benign     | Likely benign |
| 1012 | c. 1065G>A | rs41286292   | Pathogenic | Likely benign |
| 1013 | c. 1041G>T |              | Benign     | Likely benign |
| 1014 | c. 1041G>A | rs1555592609 | Pathogenic | Likely benign |
| 1015 | c. 1039C>T | rs1378561919 | Benign     | Likely benign |
| 1016 | c. 1038C>T | rs1555592618 | Benign     | Likely benign |
| 1017 | c. 1017G>A | rs863224416  | Pathogenic | Likely benign |
| 1018 | c. 1014A>G | rs876660793  | Benign     | Likely benign |
| 1019 | c. 1002C>T | rs1555592693 | Benign     | Likely benign |
| 1020 | c. 1001C>A | rs41286290   | Pathogenic | Likely benign |
| 1021 | c. 999T>A  |              | Benign     | Likely benign |
| 1022 | c. 996G>T  | rs80356836   | Pathogenic | Likely benign |
| 1023 | c. 990T>C  | rs978690648  | Benign     | Likely benign |
| 1024 | c. 987T>C  | rs774849810  | Benign     | Likely benign |
| 1025 | c. 981A>C  | rs1800063    | Benign     | Likely benign |

|      |              |              |            |               |
|------|--------------|--------------|------------|---------------|
| 1026 | c. 975G>A    | rs786201624  | Benign     | Likely benign |
| 1027 | c. 969A>T    | rs45586033   | Pathogenic | Likely benign |
| 1028 | c. 957C>T    | rs1057524333 | Benign     | Likely benign |
| 1029 | c. 956A>G    | rs397507258  | Benign     | Likely benign |
| 1030 | c. 951A>G    | rs759419385  | Benign     | Likely benign |
| 1031 | c. 945G>A    | rs1555592789 | Pathogenic | Likely benign |
| 1032 | c. 937T>C    | rs1131692072 | Benign     | Likely benign |
| 1033 | c. 936C>T    |              | Benign     | Likely benign |
| 1034 | c. 927A>G    | rs757936216  | Benign     | Likely benign |
| 1035 | c. 918T>C    | rs1555592835 | Benign     | Likely benign |
| 1036 | c. 888A>G    | rs1555592914 | Benign     | Likely benign |
| 1037 | c. 885C>T    | rs1060504557 | Benign     | Likely benign |
| 1038 | c. 879T>G    | rs139433219  | Benign     | Likely benign |
| 1039 | c. 876C>T    | rs771001707  | Benign     | Likely benign |
| 1040 | c. 843C>T    |              | Benign     | Likely benign |
| 1041 | c. 837T>C    | rs775477245  | Benign     | Likely benign |
| 1042 | c. 834T>A    |              | Pathogenic | Likely benign |
| 1043 | c. 834T>G    | rs762956862  | Benign     | Likely benign |
| 1044 | c. 828A>G    | rs186274774  | Benign     | Likely benign |
| 1045 | c. 825C>T    | rs397509328  | Benign     | Likely benign |
| 1046 | c. 819A>G    | rs779225364  | Benign     | Likely benign |
| 1047 | c. 810T>C    | rs778359104  | Benign     | Likely benign |
| 1048 | c. 804C>T    | rs771076131  | Benign     | Likely benign |
| 1049 | c. 789T>C    | rs397509320  | Benign     | Likely benign |
| 1050 | c. 786G>A    | rs397509317  | Pathogenic | Likely benign |
| 1051 | c. 768G>A    | rs746067447  | Benign     | Likely benign |
| 1052 | c. 766A>C    | rs587781833  | Benign     | Likely benign |
| 1053 | c. 765G>A    | rs62625299   | Pathogenic | Likely benign |
| 1054 | c. 762T>C    | rs1555593173 | Benign     | Likely benign |
| 1055 | c. 759A>T    | rs1131692069 | Pathogenic | Likely benign |
| 1056 | c. 756T>C    | rs786201338  | Benign     | Likely benign |
| 1057 | c. 750G>A    | rs762867923  | Pathogenic | Likely benign |
| 1058 | c. 744C>T    | rs886037791  | Benign     | Likely benign |
| 1059 | c. 744C>G    | rs886037791  | Benign     | Likely benign |
| 1060 | c. 741C>T    |              | Benign     | Likely benign |
| 1061 | c. 739A>G    | rs767720128  | Benign     | Likely benign |
| 1062 | c. 738G>A    | rs768416164  | Pathogenic | Likely benign |
| 1063 | c. 736T>C    | rs28897675   | Benign     | Likely benign |
| 1064 | c. 705T>C    | rs1165432483 | Benign     | Likely benign |
| 1065 | c. 699A>G    | rs786202162  | Pathogenic | Likely benign |
| 1066 | c. 696T>C    | rs1057523563 | Benign     | Likely benign |
| 1067 | c. 693G>T    | rs62625298   | Benign     | Likely benign |
| 1068 | c. 693G>A    | rs62625298   | Benign     | Likely benign |
| 1069 | c. 675T>G    | rs1555593332 | Benign     | Likely benign |
| 1070 | c. 671-11T>C |              | Benign     | Likely benign |
| 1071 | c. 670+18C>A |              | Benign     | Likely benign |
| 1072 | c. 670+8C>T  | rs80358050   | Pathogenic | Likely benign |
| 1073 | c. 669G>A    | rs1131692066 | Pathogenic | Likely benign |
| 1074 | c. 654G>A    | rs1555593548 | Pathogenic | Likely benign |
| 1075 | c. 652T>C    | rs765950064  | Benign     | Likely benign |
| 1076 | c. 639G>A    | rs1131692078 | Benign     | Likely benign |
| 1077 | c. 621C>T    | rs1555593586 | Benign     | Likely benign |
| 1078 | c. 618A>G    |              | Benign     | Likely benign |
| 1079 | c. 615A>G    |              | Pathogenic | Likely benign |

|      |              |              |            |               |
|------|--------------|--------------|------------|---------------|
| 1080 | c. 612G>A    |              | Pathogenic | Likely benign |
| 1081 | c. 603T>C    | rs786201512  | Benign     | Likely benign |
| 1082 | c. 600A>G    | rs1555593617 | Pathogenic | Likely benign |
| 1083 | c. 588T>C    | rs1131692071 | Benign     | Likely benign |
| 1084 | c. 579G>A    | rs759197544  | Benign     | Likely benign |
| 1085 | c. 576T>C    | rs1555594046 | Benign     | Likely benign |
| 1086 | c. 570C>A    | rs201536070  | Benign     | Likely benign |
| 1087 | c. 570C>T    | rs201536070  | Benign     | Likely benign |
| 1088 | c. 567T>C    | rs80356845   | Benign     | Likely benign |
| 1089 | c. 564A>G    | rs768065826  | Benign     | Likely benign |
| 1090 | c. 549A>C    | rs1555594077 | Benign     | Likely benign |
| 1091 | c. 547+16T>G |              | Benign     | Likely benign |
| 1092 | c. 546G>A    |              | Benign     | Likely benign |
| 1093 | c. 543A>G    | rs397507250  | Benign     | Likely benign |
| 1094 | c. 528G>A    | rs34545365   | Benign     | Likely benign |
| 1095 | c. 525G>A    | rs1555594837 | Pathogenic | Likely benign |
| 1096 | c. 522A>G    | rs765432756  | Benign     | Likely benign |
| 1097 | c. 519T>A    | rs876659179  | Benign     | Likely benign |
| 1098 | c. 516A>G    | rs752940034  | Benign     | Likely benign |
| 1099 | c. 511A>G    | rs777515082  | Benign     | Likely benign |
| 1100 | c. 508C>A    |              | Benign     | Likely benign |
| 1101 | c. 507G>A    | rs759882045  | Benign     | Likely benign |
| 1102 | c. 495G>A    | rs745321499  | Pathogenic | Likely benign |
| 1103 | c. 486G>T    | rs769213707  | Pathogenic | Likely benign |
| 1104 | c. 483T>C    | rs1060504575 | Benign     | Likely benign |
| 1105 | c. 477T>C    | rs779704727  | Benign     | Likely benign |
| 1106 | c. 468C>G    | rs748923729  | Benign     | Likely benign |
| 1107 | c. 459T>C    | rs1555594962 | Benign     | Likely benign |
| 1108 | c. 439T>C    | rs794727800  | Benign     | Likely benign |
| 1109 | c. 438C>T    | rs1555596287 | Benign     | Likely benign |
| 1110 | c. 426C>G    |              | Benign     | Likely benign |
| 1111 | c. 426C>T    | rs542687218  | Benign     | Likely benign |
| 1112 | c. 420T>C    | rs730881448  | Benign     | Likely benign |
| 1113 | c. 414A>G    |              | Pathogenic | Likely benign |
| 1114 | c. 411T>C    | rs1258746087 | Benign     | Likely benign |
| 1115 | c. 399T>C    | rs1555596341 | Benign     | Likely benign |
| 1116 | c. 397C>A    | rs80357457   | Benign     | Likely benign |
| 1117 | c. 390C>T    | rs80356888   | Benign     | Likely benign |
| 1118 | c. 378A>G    | rs786201256  | Benign     | Likely benign |
| 1119 | c. 375C>T    | rs1311672121 | Benign     | Likely benign |
| 1120 | c. 372C>A    | rs273900715  | Pathogenic | Likely benign |
| 1121 | c. 369T>A    | rs774583925  | Benign     | Likely benign |
| 1122 | c. 366T>G    | rs190900046  | Benign     | Likely benign |
| 1123 | c. 363A>G    | rs1060504552 | Benign     | Likely benign |
| 1124 | c. 354A>G    | rs1320340280 | Pathogenic | Likely benign |
| 1125 | c. 342T>C    |              | Benign     | Likely benign |
| 1126 | c. 339C>T    | rs587779367  | Benign     | Likely benign |
| 1127 | c. 330G>A    | rs878854947  | Benign     | Likely benign |
| 1128 | c. 309C>T    | rs876659814  | Benign     | Likely benign |
| 1129 | c. 303T>C    | rs80356936   | Benign     | Likely benign |
| 1130 | c. 301+13T>A |              | Benign     | Likely benign |
| 1131 | c. 300G>A    | rs1555596638 | Benign     | Likely benign |
| 1132 | c. 291A>C    |              | Benign     | Likely benign |
| 1133 | c. 291A>G    | rs1131692085 | Pathogenic | Likely benign |

|      |              |              |            |               |
|------|--------------|--------------|------------|---------------|
| 1134 | c. 288C>T    | rs146085503  | Benign     | Likely benign |
| 1135 | c. 282G>T    |              | Benign     | Likely benign |
| 1136 | c. 270T>C    | rs1555596670 | Benign     | Likely benign |
| 1137 | c. 267C>G    | rs80356963   | Pathogenic | Likely benign |
| 1138 | c. 261G>A    | rs757971617  | Pathogenic | Likely benign |
| 1139 | c. 259T>C    | rs80357091   | Benign     | Likely benign |
| 1140 | c. 258A>T    | rs777491912  | Benign     | Likely benign |
| 1141 | c. 258A>G    | rs777491912  | Pathogenic | Likely benign |
| 1142 | c. 255G>A    | rs756499058  | Benign     | Likely benign |
| 1143 | c. 249T>C    | rs780485347  | Benign     | Likely benign |
| 1144 | c. 243A>G    | rs863224418  | Benign     | Likely benign |
| 1145 | c. 231G>A    | rs80356847   | Benign     | Likely benign |
| 1146 | c. 231G>C    | rs80356847   | Benign     | Likely benign |
| 1147 | c. 231G>T    | rs80356847   | Benign     | Likely benign |
| 1148 | c. 222A>G    | rs730881465  | Benign     | Likely benign |
| 1149 | c. 219A>G    | rs876659123  | Pathogenic | Likely benign |
| 1150 | c. 217C>T    | rs786201203  | Benign     | Likely benign |
| 1151 | c. 216C>T    |              | Benign     | Likely benign |
| 1152 | c. 212+14T>G |              | Benign     | Likely benign |
| 1153 | c. 212+10T>G | rs80358174   | Benign     | Likely benign |
| 1154 | c. 183T>C    | rs895070717  | Benign     | Likely benign |
| 1155 | c. 171G>T    | rs1057523606 | Pathogenic | Likely benign |
| 1156 | c. 159C>T    | rs1060504588 | Benign     | Likely benign |
| 1157 | c. 153T>G    | rs1131692081 | Pathogenic | Likely benign |
| 1158 | c. 150A>G    | rs1555597289 | Benign     | Likely benign |
| 1159 | c. 147G>A    | rs1555597297 | Pathogenic | Likely benign |
| 1160 | c. 141C>T    | rs398122635  | Benign     | Likely benign |
| 1161 | c. 134+9G>A  |              | Pathogenic | Likely benign |
| 1162 | c. 123C>T    | rs786202211  | Benign     | Likely benign |
| 1163 | c. 120C>T    | rs1060504580 | Benign     | Likely benign |
| 1164 | c. 111A>C    |              | Benign     | Likely benign |
| 1165 | c. 111A>G    | rs1293537445 | Benign     | Likely benign |
| 1166 | c. 102T>G    | rs1555599260 | Benign     | Likely benign |
| 1167 | c. 87G>A     |              | Benign     | Likely benign |
| 1168 | c. 84G>A     | rs1555599278 | Benign     | Likely benign |
| 1169 | c. 82C>T     |              | Benign     | Likely benign |
| 1170 | c. 81-4C>T   |              | Benign     | Likely benign |
| 1171 | c. 81-14C>A  |              | Benign     | Likely benign |
| 1172 | c. 81-16C>T  |              | Benign     | Likely benign |
| 1173 | c. 78C>T     | rs1555600862 | Benign     | Likely benign |
| 1174 | c. 75C>T     | rs80356839   | Benign     | Likely benign |
| 1175 | c. 69G>A     | rs766004110  | Benign     | Likely benign |
| 1176 | c. 66A>G     | rs786202533  | Pathogenic | Likely benign |
| 1177 | c. 64T>C     |              | Benign     | Likely benign |
| 1178 | c. 63C>T     | rs1555600921 | Benign     | Likely benign |
| 1179 | c. 61A>G     | rs80357406   | Benign     | Likely benign |
| 1180 | c. 60A>G     | rs202168814  | Benign     | Likely benign |
| 1181 | c. 48T>C     |              | Benign     | Likely benign |
| 1182 | c. 42C>T     | rs80356827   | Benign     | Likely benign |
| 1183 | c. 42C>A     | rs80356827   | Benign     | Likely benign |
| 1184 | c. 36A>G     | rs763230080  | Benign     | Likely benign |
| 1185 | c. 33A>G     | rs1555601010 | Pathogenic | Likely benign |
| 1186 | c. 15T>C     |              | Benign     | Likely benign |
| 1187 | c. 9A>G      |              | Pathogenic | Likely benign |

|      |              |              |            |                   |
|------|--------------|--------------|------------|-------------------|
| 1188 | c. 6T>C      | rs754763517  | Benign     | Likely benign     |
| 1189 | c. -17C>T    |              | Benign     | Likely benign     |
| 1190 | c. -19-10T>C | rs201866997  | Benign     | Likely benign     |
| 1191 | c. -20+57G>A | rs556032779  | Benign     | Likely benign     |
| 1192 | c. -20+55G>A | rs772215665  | Benign     | Likely benign     |
| 1193 | c. -20+28G>A |              | Benign     | Likely benign     |
| 1194 | c. -20+13C>G |              | Benign     | Likely benign     |
| 1195 | c. -20+13C>T | rs770368390  | Benign     | Likely benign     |
| 1196 | c. -20+11C>T | rs273898672  | Benign     | Likely benign     |
| 1197 | c. -25G>A    | rs1057520890 | Benign     | Likely benign     |
| 1198 | c. -26G>T    | rs1057522752 | Benign     | Likely benign     |
| 1199 | c. -29C>G    | rs774839252  | Benign     | Likely benign     |
| 1200 | c. -37C>T    | rs1057524754 | Benign     | Likely benign     |
| 1201 | c. -38C>T    | rs1555601360 | Benign     | Likely benign     |
| 1202 | c. -45G>C    | rs1057521869 | Benign     | Likely benign     |
| 1203 | c. -49G>A    | rs1057523081 | Benign     | Likely benign     |
| 1204 | c. -53C>T    |              | Benign     | Likely benign     |
| 1205 | c. 5558A>G   | rs80357258   | Pathogenic | Likely pathogenic |
| 1206 | c. 5527G>C   | rs80357019   | Pathogenic | Likely pathogenic |
| 1207 | c. 5521A>C   | rs80357299   | Benign     | Likely pathogenic |
| 1208 | c. 5513T>G   | rs80357107   | Benign     | Likely pathogenic |
| 1209 | c. 5509T>G   | rs80356959   | Benign     | Likely pathogenic |
| 1210 | c. 5497G>A   | rs80357268   | Pathogenic | Likely Pathogenic |
| 1211 | c. 5434C>G   | rs1800751    | Benign     | Likely Pathogenic |
| 1212 | c. 5426T>A   |              | Benign     | Likely pathogenic |
| 1213 | c. 5425G>T   | rs28897698   | Benign     | Likely pathogenic |
| 1214 | c. 5408G>C   | rs80357149   | Benign     | Likely Pathogenic |
| 1215 | c. 5407-1G>A | rs80358029   | Pathogenic | Likely Pathogenic |
| 1216 | c. 5363G>C   | rs80357069   | Benign     | Likely pathogenic |
| 1217 | c. 5362G>T   | rs397509271  | Benign     | Likely pathogenic |
| 1218 | c. 5339T>C   | rs80357474   | Benign     | Likely Pathogenic |
| 1219 | c. 5307T>G   | rs397509258  | Benign     | Likely pathogenic |
| 1220 | c. 5278-2A>G | rs397509253  | Pathogenic | Likely Pathogenic |
| 1221 | c. 5277G>T   | rs80356854   | Benign     | Likely pathogenic |
| 1222 | c. 5254G>C   | rs80357074   | Benign     | Likely pathogenic |
| 1223 | c. 5252G>C   | rs80357442   | Benign     | Likely pathogenic |
| 1224 | c. 5243G>A   | rs397509243  | Pathogenic | Likely pathogenic |
| 1225 | c. 5213G>A   | rs80357450   | Pathogenic | Likely Pathogenic |
| 1226 | c. 5207T>G   | rs45553935   | Benign     | Likely Pathogenic |
| 1227 | c. 5194-2A>G | rs80358069   | Pathogenic | Likely Pathogenic |
| 1228 | c. 5193+1G>T | rs80358004   | Pathogenic | Likely Pathogenic |
| 1229 | c. 5165C>T   | rs80357104   | Benign     | Likely Pathogenic |
| 1230 | c. 5164T>C   | rs483353100  | Benign     | Likely pathogenic |
| 1231 | c. 5154G>T   | rs80357239   | Benign     | Likely pathogenic |
| 1232 | c. 5153G>C   | rs41293461   | Pathogenic | Likely pathogenic |
| 1233 | c. 5141T>G   | rs80357243   | Benign     | Likely pathogenic |
| 1234 | c. 5116G>A   | rs886040864  | Pathogenic | Likely Pathogenic |
| 1235 | c. 5114T>C   | rs397507242  | Benign     | Likely Pathogenic |
| 1236 | c. 5098A>G   | rs397509227  | Benign     | Likely pathogenic |
| 1237 | c. 5075-1G>A | rs1800747    | Pathogenic | Likely Pathogenic |
| 1238 | c. 5075-3C>G | rs398122690  | Benign     | Likely pathogenic |
| 1239 | c. 5074+3A>G | rs80358181   | Pathogenic | Likely Pathogenic |
| 1240 | c. 5074G>A   | rs80187739   | Pathogenic | Likely Pathogenic |
| 1241 | c. 5072C>T   | rs80357034   | Benign     | Likely pathogenic |



|      |                  |                 |            |                   |
|------|------------------|-----------------|------------|-------------------|
| 1242 | c. 5072C>A       | rs80357034      | Benign     | Likely pathogenic |
| 1243 | c. 5066T>G       | rs80357061      | Benign     | Likely Pathogenic |
| 1244 | c. 5057A>G       | rs730882166     | Pathogenic | Likely Pathogenic |
| 1245 | c. 4986+6T>C     | rs80358086      | Benign     | Likely Pathogenic |
| 1246 | c. 4986+4A>C     | rs80358087      | Benign     | Likely Pathogenic |
| 1247 | c. 4986+3G>C     | rs80358023      | Benign     | Likely Pathogenic |
| 1248 | c. 4964C>T       | rs80357390      | Benign     | Likely Pathogenic |
| 1249 | c. 4888G>T       | rs1173155015    | Pathogenic | Likely pathogenic |
| 1250 | c. 4868C>G       | rs80356862      | Benign     | Likely Pathogenic |
| 1251 | c. 4675G>C       | rs80356988      | Benign     | Likely Pathogenic |
| 1252 | c. 4485-1G>A     | rs80358189      | Pathogenic | Likely Pathogenic |
| 1253 | c. 4485-2A>G     | rs80358054      | Pathogenic | Likely Pathogenic |
| 1254 | c. 4484G>A       | rs80357389      | Pathogenic | Likely Pathogenic |
| 1255 | c. 4358-2786G>A  | rs374435098     | Pathogenic | Likely pathogenic |
| 1256 | c. 4232T>C       | rs273900729     | Benign     | Likely pathogenic |
| 1257 | c. 4224G>C       |                 | Benign     | Likely pathogenic |
| 1258 | c. 4185G>C       | rs80356857      | Benign     | Likely pathogenic |
| 1259 | c. 4093T>G       | rs1567788936    | Benign     | Likely pathogenic |
| 1260 | c. 2351C>A       | rs55914168      | Benign     | Likely pathogenic |
| 1261 | c. 869T>A        | rs730881468     | Benign     | Likely Pathogenic |
| 1262 | c. 688G>T        | rs1555593310    | Pathogenic | Likely Pathogenic |
| 1263 | c. 671-1G>T      | rs80358020      | Benign     | Likely Pathogenic |
| 1264 | c. 614T>G        | rs1555593598    | Benign     | Likely pathogenic |
| 1265 | c. 441+2T>A      | rs397509173     | Pathogenic | Likely Pathogenic |
| 1266 | c. 287A>G        | rs864622444     | Benign     | Likely pathogenic |
| 1267 | c. 212+3A>T      |                 | Benign     | Likely pathogenic |
| 1268 | c. 212G>T        | rs80356913      | Benign     | Likely Pathogenic |
| 1269 | c. 192T>G        | rs587781632     | Benign     | Likely Pathogenic |
| 1270 | c. 182G>A        | rs80357093      | Pathogenic | Likely Pathogenic |
| 1271 | c. 181T>C        | rs28897672      | Benign     | Likely Pathogenic |
| 1272 | c. 140G>T        | rs80357150      | Benign     | Likely Pathogenic |
| 1273 | c. 139T>G        | rs80357370      | Benign     | Likely pathogenic |
| 1274 | c. 134+5G>T      | rs80358038      | Benign     | Likely pathogenic |
| 1275 | c. 134+5G>A      | rs80358038      | Benign     | Likely pathogenic |
| 1276 | c. 134+5G>C      | rs80358038      | Benign     | Likely pathogenic |
| 1277 | c. 132C>G        |                 | Benign     | Likely pathogenic |
| 1278 | c. 116G>T        | rs80357498      | Benign     | Likely Pathogenic |
| 1279 | c. 115T>G        | rs80357164      | Benign     | Likely Pathogenic |
| 1280 | c. 115T>A        | rs80357164      | Benign     | Likely Pathogenic |
| 1281 | c. 110C>G        | rs80356880      | Benign     | Likely pathogenic |
| 1282 | c. 72T>G         |                 | Benign     | Likely pathogenic |
| 1283 | c. 70T>C         | rs80357410      | Benign     | Likely Pathogenic |
| 1284 | c. [-1A>G; 3G>A] | rs80357475 rs58 | Pathogenic | Likely pathogenic |
| 1285 | c. 3G>A          | rs80357475      | Pathogenic | Likely Pathogenic |
| 1286 | c. 2T>C          | rs80357111      | Benign     | Likely Pathogenic |
| 1287 | c. 5565A>T       |                 | Benign     | not provided      |
| 1288 | c. 5565A>G       |                 | Pathogenic | not provided      |
| 1289 | c. 5564T>G       |                 | Benign     | not provided      |
| 1290 | c. 5564T>A       |                 | Benign     | not provided      |
| 1291 | c. 5563A>T       |                 | Benign     | not provided      |
| 1292 | c. 5563A>G       |                 | Benign     | not provided      |
| 1293 | c. 5563A>C       |                 | Benign     | not provided      |
| 1294 | c. 5562G>T       |                 | Pathogenic | not provided      |
| 1295 | c. 5562G>C       |                 | Benign     | not provided      |

1296 c. 5561T>G  
1297 c. 5561T>A  
1298 c. 5560C>T  
1299 c. 5560C>G  
1300 c. 5560C>A  
1301 c. 5559C>T  
1302 c. 5558A>T  
1303 c. 5558A>C  
1304 c. 5557T>G  
1305 c. 5557T>C  
1306 c. 5557T>A  
1307 c. 5556C>A  
1308 c. 5556C>T  
1309 c. 5555C>G  
1310 c. 5555C>A  
1311 c. 5554A>T  
1312 c. 5554A>C  
1313 c. 5553C>G  
1314 c. 5552A>T  
1315 c. 5552A>G  
1316 c. 5552A>C  
1317 c. 5551G>T  
1318 c. 5551G>C  
1319 c. 5550G>T  
1320 c. 5549T>G  
1321 c. 5549T>C  
1322 c. 5549T>A  
1323 c. 5548C>T  
1324 c. 5548C>G  
1325 c. 5548C>A  
1326 c. 5547G>T  
1327 c. 5547G>C  
1328 c. 5546A>T  
1329 c. 5546A>G  
1330 c. 5546A>C  
1331 c. 5545G>T  
1332 c. 5545G>C  
1333 c. 5545G>A  
1334 c. 5544G>T  
1335 c. 5544G>C  
1336 c. 5544G>A  
1337 c. 5543A>T  
1338 c. 5543A>G  
1339 c. 5543A>C  
1340 c. 5542C>G  
1341 c. 5542C>A  
1342 c. 5541C>G  
1343 c. 5540G>C  
1344 c. 5540G>A  
1345 c. 5539T>G  
1346 c. 5539T>C  
1347 c. 5539T>A  
1348 c. 5538G>T  
1349 c. 5537A>T

|            |              |
|------------|--------------|
| Benign     | not provided |
| Benign     | not provided |
| Benign     | not provided |
| Benign     | not provided |
| Pathogenic | not provided |
| Benign     | not provided |
| Benign     | not provided |
| Benign     | not provided |
| Benign     | not provided |
| Benign     | not provided |
| Benign     | not provided |
| Pathogenic | not provided |
| Benign     | not provided |
| Benign     | not provided |
| Benign     | not provided |
| Benign     | not provided |
| Benign     | not provided |
| Benign     | not provided |
| Benign     | not provided |
| Benign     | not provided |
| Pathogenic | not provided |
| Benign     | not provided |
| Benign     | not provided |
| Benign     | not provided |
| Benign     | not provided |
| Benign     | not provided |
| Benign     | not provided |
| Benign     | not provided |
| Pathogenic | not provided |
| Pathogenic | not provided |
| Pathogenic | not provided |
| Benign     | not provided |
| Pathogenic | not provided |
| Benign     | not provided |
| Pathogenic | not provided |
| Pathogenic | not provided |
| Pathogenic | not provided |
| Pathogenic | not provided |
| Benign     | not provided |
| Benign     | not provided |
| Pathogenic | not provided |
| Benign     | not provided |
| Benign     | not provided |
| Pathogenic | not provided |
| Benign     | not provided |
| Benign     | not provided |
| Benign     | not provided |
| Benign     | not provided |
| Pathogenic | not provided |

1350 c. 5537A>G  
1351 c. 5537A>C  
1352 c. 5536C>G  
1353 c. 5535C>T  
1354 c. 5534A>T  
1355 c. 5534A>C  
1356 c. 5533T>G  
1357 c. 5533T>C  
1358 c. 5533T>A  
1359 c. 5532C>G  
1360 c. 5532C>A  
1361 c. 5531T>A  
1362 c. 5530C>T  
1363 c. 5530C>G  
1364 c. 5529A>T  
1365 c. 5528C>G  
1366 c. 5527G>T  
1367 c. 5527G>A  
1368 c. 5526A>T  
1369 c. 5526A>C  
1370 c. 5525T>G  
1371 c. 5525T>C  
1372 c. 5524G>C  
1373 c. 5524G>A  
1374 c. 5524G>T  
1375 c. 5523T>G  
1376 c. 5523T>A  
1377 c. 5522G>T  
1378 c. 5521A>T  
1379 c. 5520C>T  
1380 c. 5520C>G  
1381 c. 5520C>A  
1382 c. 5519A>T  
1383 c. 5519A>G  
1384 c. 5518G>C  
1385 c. 5517G>T  
1386 c. 5517G>C  
1387 c. 5516T>A  
1388 c. 5515T>G  
1389 c. 5515T>C  
1390 c. 5514G>C  
1391 c. 5514G>A  
1392 c. 5513T>C  
1393 c. 5512G>C  
1394 c. 5510G>T  
1395 c. 5510G>C  
1396 c. 5508G>T  
1397 c. 5508G>C  
1398 c. 5508G>A  
1399 c. 5507A>T  
1400 c. 5507A>G  
1401 c. 5507A>C  
1402 c. 5506G>C  
1403 c. 5505A>T

|            |              |
|------------|--------------|
| Pathogenic | not provided |
| Benign     | not provided |
| Pathogenic | not provided |
| Benign     | not provided |
| Benign     | not provided |
| Benign     | not provided |
| Benign     | not provided |
| Benign     | not provided |
| Benign     | not provided |
| Benign     | not provided |
| Benign     | not provided |
| Pathogenic | not provided |
| Benign     | not provided |
| Benign     | not provided |
| Benign     | not provided |
| Benign     | not provided |
| Pathogenic | not provided |
| Pathogenic | not provided |
| Benign     | not provided |
| Benign     | not provided |
| Benign     | not provided |
| Benign     | not provided |
| Pathogenic | not provided |
| Benign     | not provided |
| Benign     | not provided |
| Pathogenic | not provided |
| Benign     | not provided |
| Benign     | not provided |
| Benign     | not provided |
| Benign     | not provided |
| Pathogenic | not provided |
| Benign     | not provided |
| Benign     | not provided |
| Benign     | not provided |
| Pathogenic | not provided |
| Benign     | not provided |
| Benign     | not provided |
| Pathogenic | not provided |
| Pathogenic | not provided |
| Pathogenic | not provided |
| Benign     | not provided |
| Benign     | not provided |
| Pathogenic | not provided |

|      |            |            |              |
|------|------------|------------|--------------|
| 1404 | c. 5505A>G | Pathogenic | not provided |
| 1405 | c. 5505A>C | Benign     | not provided |
| 1406 | c. 5504G>T | Benign     | not provided |
| 1407 | c. 5503C>G | Benign     | not provided |
| 1408 | c. 5503C>A | Benign     | not provided |
| 1409 | c. 5502C>G | Pathogenic | not provided |
| 1410 | c. 5502C>A | Pathogenic | not provided |
| 1411 | c. 5501C>G | Benign     | not provided |
| 1412 | c. 5500A>T | Benign     | not provided |
| 1413 | c. 5500A>G | Benign     | not provided |
| 1414 | c. 5500A>C | Benign     | not provided |
| 1415 | c. 5499G>T | Pathogenic | not provided |
| 1416 | c. 5499G>C | Benign     | not provided |
| 1417 | c. 5499G>A | Pathogenic | not provided |
| 1418 | c. 5498T>A | Benign     | not provided |
| 1419 | c. 5497G>C | Benign     | not provided |
| 1420 | c. 5495T>G | Benign     | not provided |
| 1421 | c. 5495T>C | Benign     | not provided |
| 1422 | c. 5494G>C | Benign     | not provided |
| 1423 | c. 5493T>G | Benign     | not provided |
| 1424 | c. 5493T>C | Benign     | not provided |
| 1425 | c. 5493T>A | Benign     | not provided |
| 1426 | c. 5492C>T | Benign     | not provided |
| 1427 | c. 5492C>A | Pathogenic | not provided |
| 1428 | c. 5491C>T | Benign     | not provided |
| 1429 | c. 5491C>G | Benign     | not provided |
| 1430 | c. 5491C>A | Benign     | not provided |
| 1431 | c. 5490A>T | Benign     | not provided |
| 1432 | c. 5490A>G | Benign     | not provided |
| 1433 | c. 5490A>C | Benign     | not provided |
| 1434 | c. 5489C>T | Benign     | not provided |
| 1435 | c. 5489C>G | Benign     | not provided |
| 1436 | c. 5489C>A | Benign     | not provided |
| 1437 | c. 5488G>C | Benign     | not provided |
| 1438 | c. 5488G>T | Benign     | not provided |
| 1439 | c. 5487G>T | Benign     | not provided |
| 1440 | c. 5487G>C | Benign     | not provided |
| 1441 | c. 5487G>A | Pathogenic | not provided |
| 1442 | c. 5486A>T | Pathogenic | not provided |
| 1443 | c. 5486A>G | Pathogenic | not provided |
| 1444 | c. 5486A>C | Benign     | not provided |
| 1445 | c. 5485G>T | Pathogenic | not provided |
| 1446 | c. 5485G>C | Benign     | not provided |
| 1447 | c. 5484T>G | Benign     | not provided |
| 1448 | c. 5484T>C | Benign     | not provided |
| 1449 | c. 5484T>A | Benign     | not provided |
| 1450 | c. 5483G>T | Benign     | not provided |
| 1451 | c. 5483G>C | Pathogenic | not provided |
| 1452 | c. 5483G>A | Pathogenic | not provided |
| 1453 | c. 5482T>C | Benign     | not provided |
| 1454 | c. 5482T>A | Benign     | not provided |
| 1455 | c. 5481G>T | Benign     | not provided |
| 1456 | c. 5481G>C | Benign     | not provided |
| 1457 | c. 5480T>G | Benign     | not provided |





|      |               |            |              |
|------|---------------|------------|--------------|
| 1512 | c. 5467+24G>C | Benign     | not provided |
| 1513 | c. 5467+23T>G | Benign     | not provided |
| 1514 | c. 5467+23T>C | Benign     | not provided |
| 1515 | c. 5467+23T>A | Benign     | not provided |
| 1516 | c. 5467+22G>T | Benign     | not provided |
| 1517 | c. 5467+22G>A | Pathogenic | not provided |
| 1518 | c. 5467+21T>G | Benign     | not provided |
| 1519 | c. 5467+21T>C | Benign     | not provided |
| 1520 | c. 5467+21T>A | Benign     | not provided |
| 1521 | c. 5467+20C>T | Benign     | not provided |
| 1522 | c. 5467+20C>G | Benign     | not provided |
| 1523 | c. 5467+20C>A | Pathogenic | not provided |
| 1524 | c. 5467+19C>T | Benign     | not provided |
| 1525 | c. 5467+19C>G | Benign     | not provided |
| 1526 | c. 5467+19C>A | Pathogenic | not provided |
| 1527 | c. 5467+18A>T | Benign     | not provided |
| 1528 | c. 5467+18A>G | Pathogenic | not provided |
| 1529 | c. 5467+18A>C | Benign     | not provided |
| 1530 | c. 5467+17T>G | Benign     | not provided |
| 1531 | c. 5467+17T>C | Benign     | not provided |
| 1532 | c. 5467+17T>A | Benign     | not provided |
| 1533 | c. 5467+16G>T | Benign     | not provided |
| 1534 | c. 5467+16G>C | Benign     | not provided |
| 1535 | c. 5467+16G>A | Pathogenic | not provided |
| 1536 | c. 5467+15T>G | Benign     | not provided |
| 1537 | c. 5467+15T>A | Benign     | not provided |
| 1538 | c. 5467+14A>T | Benign     | not provided |
| 1539 | c. 5467+14A>C | Benign     | not provided |
| 1540 | c. 5467+13C>G | Benign     | not provided |
| 1541 | c. 5467+13C>A | Benign     | not provided |
| 1542 | c. 5467+13C>T | Benign     | not provided |
| 1543 | c. 5467+12G>T | Benign     | not provided |
| 1544 | c. 5467+12G>C | Benign     | not provided |
| 1545 | c. 5467+11T>G | Benign     | not provided |
| 1546 | c. 5467+11T>C | Benign     | not provided |
| 1547 | c. 5467+11T>A | Benign     | not provided |
| 1548 | c. 5467+10C>T | Benign     | not provided |
| 1549 | c. 5467+10C>G | Benign     | not provided |
| 1550 | c. 5467+10C>A | Benign     | not provided |
| 1551 | c. 5467+9C>G  | Benign     | not provided |
| 1552 | c. 5467+8G>C  | Benign     | not provided |
| 1553 | c. 5467+7T>G  | Benign     | not provided |
| 1554 | c. 5467+7T>C  | Benign     | not provided |
| 1555 | c. 5467+7T>A  | Benign     | not provided |
| 1556 | c. 5467+6G>T  | Pathogenic | not provided |
| 1557 | c. 5467+6G>C  | Benign     | not provided |
| 1558 | c. 5467+6G>A  | Pathogenic | not provided |
| 1559 | c. 5467+5G>A  | Pathogenic | not provided |
| 1560 | c. 5467+4A>T  | Pathogenic | not provided |
| 1561 | c. 5467+4A>C  | Benign     | not provided |
| 1562 | c. 5467+3A>T  | Benign     | not provided |
| 1563 | c. 5467+3A>G  | Pathogenic | not provided |
| 1564 | c. 5467+2T>A  | Pathogenic | not provided |
| 1565 | c. 5467+1G>T  | Pathogenic | not provided |

1566 c. 5467+1G>C  
1567 c. 5467G>T  
1568 c. 5467G>C  
1569 c. 5466T>G  
1570 c. 5466T>A  
1571 c. 5465A>T  
1572 c. 5465A>G  
1573 c. 5465A>C  
1574 c. 5464C>T  
1575 c. 5464C>G  
1576 c. 5464C>A  
1577 c. 5463C>T  
1578 c. 5463C>G  
1579 c. 5463C>A  
1580 c. 5462T>G  
1581 c. 5462T>C  
1582 c. 5462T>A  
1583 c. 5461T>G  
1584 c. 5461T>C  
1585 c. 5461T>A  
1586 c. 5460C>T  
1587 c. 5460C>G  
1588 c. 5460C>A  
1589 c. 5459G>T  
1590 c. 5459G>C  
1591 c. 5459G>A  
1592 c. 5458G>C  
1593 c. 5458G>T  
1594 c. 5457T>G  
1595 c. 5457T>A  
1596 c. 5456A>T  
1597 c. 5456A>C  
1598 c. 5455A>T  
1599 c. 5455A>G  
1600 c. 5455A>C  
1601 c. 5454C>G  
1602 c. 5454C>A  
1603 c. 5453A>T  
1604 c. 5453A>C  
1605 c. 5452G>T  
1606 c. 5452G>C  
1607 c. 5452G>A  
1608 c. 5451G>T  
1609 c. 5451G>C  
1610 c. 5450A>G  
1611 c. 5450A>C  
1612 c. 5450A>T  
1613 c. 5449G>C  
1614 c. 5449G>A  
1615 c. 5448A>T  
1616 c. 5448A>C  
1617 c. 5447C>T  
1618 c. 5446A>T  
1619 c. 5446A>G

|            |              |
|------------|--------------|
| Pathogenic | not provided |
| Benign     | not provided |
| Benign     | not provided |
| Benign     | not provided |
| Benign     | not provided |
| Benign     | not provided |
| Benign     | not provided |
| Benign     | not provided |
| Benign     | not provided |
| Benign     | not provided |
| Benign     | not provided |
| Benign     | not provided |
| Benign     | not provided |
| Benign     | not provided |
| Benign     | not provided |
| Benign     | not provided |
| Benign     | not provided |
| Benign     | not provided |
| Benign     | not provided |
| Benign     | not provided |
| Pathogenic | not provided |
| Benign     | not provided |
| Benign     | not provided |
| Benign     | not provided |
| Benign     | not provided |
| Benign     | not provided |
| Benign     | not provided |
| Benign     | not provided |
| Benign     | not provided |
| Benign     | not provided |
| Benign     | not provided |
| Benign     | not provided |
| Pathogenic | not provided |
| Benign     | not provided |
| Benign     | not provided |
| Benign     | not provided |
| Benign     | not provided |
| Benign     | not provided |
| Benign     | not provided |
| Pathogenic | not provided |
| Benign     | not provided |
| Pathogenic | not provided |
| Benign     | not provided |
| Benign     | not provided |
| Pathogenic | not provided |
| Benign     | not provided |
| Pathogenic | not provided |
| Pathogenic | not provided |
| Benign     | not provided |
| Benign     | not provided |
| Benign     | not provided |
| Benign     | not provided |

1620 c. 5446A>C  
1621 c. 5445G>T  
1622 c. 5445G>C  
1623 c. 5444G>T  
1624 c. 5443T>G  
1625 c. 5443T>C  
1626 c. 5443T>A  
1627 c. 5442C>T  
1628 c. 5442C>G  
1629 c. 5442C>A  
1630 c. 5441C>T  
1631 c. 5441C>G  
1632 c. 5440G>T  
1633 c. 5440G>C  
1634 c. 5440G>A  
1635 c. 5439T>G  
1636 c. 5439T>A  
1637 c. 5438A>G  
1638 c. 5438A>C  
1639 c. 5437G>C  
1640 c. 5437G>A  
1641 c. 5436A>T  
1642 c. 5436A>G  
1643 c. 5436A>C  
1644 c. 5435C>T  
1645 c. 5435C>G  
1646 c. 5435C>A  
1647 c. 5434C>A  
1648 c. 5434C>T  
1649 c. 5433G>T  
1650 c. 5433G>A  
1651 c. 5432A>T  
1652 c. 5432A>C  
1653 c. 5431C>G  
1654 c. 5431C>A  
1655 c. 5430G>T  
1656 c. 5430G>C  
1657 c. 5429T>A  
1658 c. 5428G>T  
1659 c. 5428G>C  
1660 c. 5428G>A  
1661 c. 5427T>G  
1662 c. 5427T>C  
1663 c. 5427T>A  
1664 c. 5422G>C  
1665 c. 5421T>G  
1666 c. 5421T>C  
1667 c. 5421T>A  
1668 c. 5420T>G  
1669 c. 5420T>C  
1670 c. 5420T>A  
1671 c. 5419A>C  
1672 c. 5418A>T  
1673 c. 5418A>G

|            |              |
|------------|--------------|
| Benign     | not provided |
| Pathogenic | not provided |
| Benign     | not provided |
| Benign     | not provided |
| Benign     | not provided |
| Benign     | not provided |
| Benign     | not provided |
| Benign     | not provided |
| Benign     | not provided |
| Benign     | not provided |
| Benign     | not provided |
| Benign     | not provided |
| Benign     | not provided |
| Benign     | not provided |
| Pathogenic | not provided |
| Benign     | not provided |
| Benign     | not provided |
| Benign     | not provided |
| Benign     | not provided |
| Benign     | not provided |
| Benign     | not provided |
| Pathogenic | not provided |
| Pathogenic | not provided |
| Pathogenic | not provided |
| Benign     | not provided |
| Benign     | not provided |
| Benign     | not provided |
| Benign     | not provided |
| Benign     | not provided |
| Benign     | not provided |
| Pathogenic | not provided |
| Benign     | not provided |
| Benign     | not provided |
| Benign     | not provided |
| Benign     | not provided |
| Benign     | not provided |
| Benign     | not provided |
| Pathogenic | not provided |
| Benign     | not provided |
| Benign     | not provided |
| Benign     | not provided |
| Benign     | not provided |
| Pathogenic | not provided |
| Benign     | not provided |
| Benign     | not provided |
| Benign     | not provided |
| Benign     | not provided |
| Pathogenic | not provided |
| Benign     | not provided |

|      |               |             |            |              |
|------|---------------|-------------|------------|--------------|
| 1674 | c. 5417C>T    | rs397509281 | Benign     | not provided |
| 1675 | c. 5417C>G    |             | Benign     | not provided |
| 1676 | c. 5417C>A    |             | Benign     | not provided |
| 1677 | c. 5416C>A    |             | Pathogenic | not provided |
| 1678 | c. 5415C>G    |             | Benign     | not provided |
| 1679 | c. 5415C>A    |             | Benign     | not provided |
| 1680 | c. 5414A>T    |             | Benign     | not provided |
| 1681 | c. 5414A>G    |             | Benign     | not provided |
| 1682 | c. 5414A>C    |             | Benign     | not provided |
| 1683 | c. 5413C>G    |             | Benign     | not provided |
| 1684 | c. 5413C>A    |             | Benign     | not provided |
| 1685 | c. 5412C>G    |             | Benign     | not provided |
| 1686 | c. 5412C>A    |             | Benign     | not provided |
| 1687 | c. 5411T>G    |             | Benign     | not provided |
| 1688 | c. 5411T>C    |             | Benign     | not provided |
| 1689 | c. 5410G>A    |             | Pathogenic | not provided |
| 1690 | c. 5410G>T    |             | Benign     | not provided |
| 1691 | c. 5410G>C    |             | Benign     | not provided |
| 1692 | c. 5409T>G    |             | Benign     | not provided |
| 1693 | c. 5409T>C    |             | Benign     | not provided |
| 1694 | c. 5409T>A    |             | Benign     | not provided |
| 1695 | c. 5408G>A    |             | Pathogenic | not provided |
| 1696 | c. 5407G>C    |             | Pathogenic | not provided |
| 1697 | c. 5407-1G>T  |             | Benign     | not provided |
| 1698 | c. 5407-2A>C  |             | Benign     | not provided |
| 1699 | c. 5407-3C>T  |             | Benign     | not provided |
| 1700 | c. 5407-3C>G  |             | Benign     | not provided |
| 1701 | c. 5407-3C>A  |             | Pathogenic | not provided |
| 1702 | c. 5407-4C>T  |             | Benign     | not provided |
| 1703 | c. 5407-4C>A  |             | Benign     | not provided |
| 1704 | c. 5407-5T>G  |             | Benign     | not provided |
| 1705 | c. 5407-5T>C  |             | Benign     | not provided |
| 1706 | c. 5407-5T>A  |             | Benign     | not provided |
| 1707 | c. 5407-6A>T  |             | Benign     | not provided |
| 1708 | c. 5407-6A>G  |             | Benign     | not provided |
| 1709 | c. 5407-6A>C  |             | Benign     | not provided |
| 1710 | c. 5407-7G>T  |             | Pathogenic | not provided |
| 1711 | c. 5407-7G>C  |             | Benign     | not provided |
| 1712 | c. 5407-8G>C  |             | Benign     | not provided |
| 1713 | c. 5407-8G>A  |             | Benign     | not provided |
| 1714 | c. 5407-9G>T  |             | Benign     | not provided |
| 1715 | c. 5407-10G>T |             | Benign     | not provided |
| 1716 | c. 5407-10G>C |             | Benign     | not provided |
| 1717 | c. 5407-11T>G |             | Benign     | not provided |
| 1718 | c. 5407-11T>C |             | Benign     | not provided |
| 1719 | c. 5407-11T>A |             | Benign     | not provided |
| 1720 | c. 5407-12C>T |             | Benign     | not provided |
| 1721 | c. 5407-12C>G |             | Benign     | not provided |
| 1722 | c. 5407-12C>A |             | Benign     | not provided |
| 1723 | c. 5407-13C>T |             | Benign     | not provided |
| 1724 | c. 5407-13C>G |             | Benign     | not provided |
| 1725 | c. 5407-13C>A |             | Benign     | not provided |
| 1726 | c. 5407-14T>G |             | Benign     | not provided |
| 1727 | c. 5407-14T>C |             | Benign     | not provided |





1782 c. 5399T>C  
 1783 c. 5399T>A  
 1784 c. 5398C>G  
 1785 c. 5398C>A  
 1786 c. 5398C>T  
 1787 c. 5397C>G  
 1788 c. 5397C>A  
 1789 c. 5396C>G  
 1790 c. 5396C>A  
 1791 c. 5395A>T  
 1792 c. 5395A>G  
 1793 c. 5395A>C  
 1794 c. 5394C>G  
 1795 c. 5394C>A  
 1796 c. 5393T>G  
 1797 c. 5393T>C  
 1798 c. 5393T>A  
 1799 c. 5392T>G  
 1800 c. 5392T>C  
 1801 c. 5392T>A  
 1802 c. 5391A>T  
 1803 c. 5391A>G  
 1804 c. 5391A>C  
 1805 c. 5389T>G  
 1806 c. 5389T>C  
 1807 c. 5389T>A  
 1808 c. 5388A>T  
 1809 c. 5388A>C  
 1810 c. 5387C>G  
 1811 c. 5386T>G  
 1812 c. 5386T>C  
 1813 c. 5386T>A  
 1814 c. 5385T>G  
 1815 c. 5385T>C  
 1816 c. 5385T>A  
 1817 c. 5384T>G  
 1818 c. 5384T>C  
 1819 c. 5384T>A  
 1820 c. 5383C>G  
 1821 c. 5382G>T  
 1822 c. 5381A>T  
 1823 c. 5381A>G  
 1824 c. 5381A>C  
 1825 c. 5380G>C  
 1826 c. 5380G>A  
 1827 c. 5379G>T  
 1828 c. 5379G>C  
 1829 c. 5379G>A  
 1830 c. 5378A>T  
 1831 c. 5378A>G  
 1832 c. 5377A>C  
 1833 c. 5377A>G  
 1834 c. 5376G>T  
 1835 c. 5376G>C

rs397509275

|            |              |
|------------|--------------|
| Benign     | not provided |
| Benign     | not provided |
| Benign     | not provided |
| Benign     | not provided |
| Benign     | not provided |
| Pathogenic | not provided |
| Pathogenic | not provided |
| Benign     | not provided |
| Benign     | not provided |
| Benign     | not provided |
| Pathogenic | not provided |
| Benign     | not provided |
| Benign     | not provided |
| Pathogenic | not provided |
| Pathogenic | not provided |
| Benign     | not provided |
| Benign     | not provided |
| Benign     | not provided |
| Benign     | not provided |
| Benign     | not provided |
| Benign     | not provided |
| Benign     | not provided |
| Benign     | not provided |
| Pathogenic | not provided |
| Benign     | not provided |
| Benign     | not provided |
| Benign     | not provided |
| Benign     | not provided |
| Benign     | not provided |
| Benign     | not provided |
| Benign     | not provided |
| Benign     | not provided |
| Benign     | not provided |
| Benign     | not provided |
| Benign     | not provided |
| Benign     | not provided |
| Benign     | not provided |
| Benign     | not provided |
| Benign     | not provided |
| Benign     | not provided |
| Benign     | not provided |
| Pathogenic | not provided |
| Benign     | not provided |
| Benign     | not provided |
| Benign     | not provided |
| Benign     | not provided |
| Pathogenic | not provided |
| Pathogenic | not provided |
| Benign     | not provided |
| Benign     | not provided |
| Pathogenic | not provided |
| Pathogenic | not provided |
| Benign     | not provided |
| Benign     | not provided |
| Pathogenic | not provided |
| Benign     | not provided |
| Benign     | not provided |
| Pathogenic | not provided |
| Benign     | not provided |

|      |            |             |            |              |
|------|------------|-------------|------------|--------------|
| 1836 | c. 5375T>G | rs864622244 | Benign     | not provided |
| 1837 | c. 5375T>C |             | Benign     | not provided |
| 1838 | c. 5375T>A |             | Benign     | not provided |
| 1839 | c. 5374G>T |             | Benign     | not provided |
| 1840 | c. 5373G>T |             | Benign     | not provided |
| 1841 | c. 5373G>C |             | Benign     | not provided |
| 1842 | c. 5373G>A |             | Pathogenic | not provided |
| 1843 | c. 5372T>G |             | Benign     | not provided |
| 1844 | c. 5372T>A |             | Benign     | not provided |
| 1845 | c. 5371G>C |             | Benign     | not provided |
| 1846 | c. 5370T>G |             | Benign     | not provided |
| 1847 | c. 5370T>C |             | Benign     | not provided |
| 1848 | c. 5370T>A |             | Benign     | not provided |
| 1849 | c. 5369C>T |             | Benign     | not provided |
| 1850 | c. 5369C>G |             | Pathogenic | not provided |
| 1851 | c. 5369C>A |             | Pathogenic | not provided |
| 1852 | c. 5368T>G |             | Benign     | not provided |
| 1853 | c. 5368T>A |             | Benign     | not provided |
| 1854 | c. 5367T>G |             | Benign     | not provided |
| 1855 | c. 5367T>A |             | Pathogenic | not provided |
| 1856 | c. 5366C>G |             | Benign     | not provided |
| 1857 | c. 5366C>A | rs397509269 | Benign     | not provided |
| 1858 | c. 5366C>T |             | Benign     | not provided |
| 1859 | c. 5364T>G |             | Benign     | not provided |
| 1860 | c. 5364T>C |             | Benign     | not provided |
| 1861 | c. 5364T>A |             | Benign     | not provided |
| 1862 | c. 5362G>C |             | Benign     | not provided |
| 1863 | c. 5362G>A |             | Pathogenic | not provided |
| 1864 | c. 5361T>G |             | Benign     | not provided |
| 1865 | c. 5361T>C |             | Benign     | not provided |
| 1866 | c. 5361T>A |             | Benign     | not provided |
| 1867 | c. 5360G>T |             | Benign     | not provided |
| 1868 | c. 5360G>C |             | Pathogenic | not provided |
| 1869 | c. 5359T>G |             | Benign     | not provided |
| 1870 | c. 5359T>C |             | Benign     | not provided |
| 1871 | c. 5358G>T |             | Benign     | not provided |
| 1872 | c. 5358G>A |             | Pathogenic | not provided |
| 1873 | c. 5357T>G |             | Benign     | not provided |
| 1874 | c. 5357T>A |             | Benign     | not provided |
| 1875 | c. 5356C>G |             | Benign     | not provided |
| 1876 | c. 5356C>A |             | Benign     | not provided |
| 1877 | c. 5355G>C |             | Benign     | not provided |
| 1878 | c. 5355G>A |             | Pathogenic | not provided |
| 1879 | c. 5355G>T |             | Benign     | not provided |
| 1880 | c. 5354A>T |             | Pathogenic | not provided |
| 1881 | c. 5354A>G |             | Pathogenic | not provided |
| 1882 | c. 5353C>G |             | Benign     | not provided |
| 1883 | c. 5353C>A |             | Pathogenic | not provided |
| 1884 | c. 5352A>C |             | Benign     | not provided |
| 1885 | c. 5351T>G |             | Pathogenic | not provided |
| 1886 | c. 5351T>C |             | Benign     | not provided |
| 1887 | c. 5351T>A |             | Pathogenic | not provided |
| 1888 | c. 5350G>T |             | Pathogenic | not provided |
| 1889 | c. 5350G>C |             | Pathogenic | not provided |



1944 c. 5333-13A>C  
1945 c. 5332+23G>T  
1946 c. 5332+23G>C  
1947 c. 5332+23G>A  
1948 c. 5332+22A>T  
1949 c. 5332+22A>G  
1950 c. 5332+22A>C  
1951 c. 5332+21C>T  
1952 c. 5332+21C>G  
1953 c. 5332+21C>A  
1954 c. 5332+20C>T  
1955 c. 5332+19C>A  
1956 c. 5332+18C>T  
1957 c. 5332+18C>G  
1958 c. 5332+17A>T  
1959 c. 5332+17A>G  
1960 c. 5332+17A>C  
1961 c. 5332+16A>T  
1962 c. 5332+16A>C  
1963 c. 5332+15G>T  
1964 c. 5332+15G>A  
1965 c. 5332+14A>T  
1966 c. 5332+14A>G  
1967 c. 5332+14A>C  
1968 c. 5332+13G>A  
1969 c. 5332+12G>T  
1970 c. 5332+12G>A  
1971 c. 5332+11G>T  
1972 c. 5332+11G>C  
1973 c. 5332+10T>G  
1974 c. 5332+10T>C  
1975 c. 5332+10T>A  
1976 c. 5332+9C>T  
1977 c. 5332+9C>G  
1978 c. 5332+9C>A  
1979 c. 5332+8C>G  
1980 c. 5332+8C>A  
1981 c. 5332+7G>C  
1982 c. 5332+7G>A  
1983 c. 5332+6A>T  
1984 c. 5332+6A>G  
1985 c. 5332+6A>C  
1986 c. 5332+5G>T  
1987 c. 5332+5G>C  
1988 c. 5332+4A>T  
1989 c. 5332+4A>C  
1990 c. 5332+3A>C  
1991 c. 5332+3A>T  
1992 c. 5332G>T  
1993 c. 5331A>T  
1994 c. 5331A>G  
1995 c. 5331A>C  
1996 c. 5330C>G  
1997 c. 5330C>A

rs80357112

|            |              |
|------------|--------------|
| Benign     | not provided |
| Pathogenic | not provided |
| Benign     | not provided |
| Pathogenic | not provided |
| Pathogenic | not provided |
| Pathogenic | not provided |
| Benign     | not provided |
| Benign     | not provided |
| Benign     | not provided |
| Pathogenic | not provided |
| Benign     | not provided |
| Benign     | not provided |
| Benign     | not provided |
| Benign     | not provided |
| Benign     | not provided |
| Pathogenic | not provided |
| Benign     | not provided |
| Pathogenic | not provided |
| Pathogenic | not provided |
| Pathogenic | not provided |
| Pathogenic | not provided |
| Benign     | not provided |
| Pathogenic | not provided |
| Benign     | not provided |
| Pathogenic | not provided |
| Benign     | not provided |
| Benign     | not provided |
| Benign     | not provided |
| Benign     | not provided |
| Benign     | not provided |
| Benign     | not provided |
| Benign     | not provided |
| Benign     | not provided |
| Benign     | not provided |
| Benign     | not provided |
| Benign     | not provided |
| Benign     | not provided |
| Benign     | not provided |
| Benign     | not provided |
| Pathogenic | not provided |
| Pathogenic | not provided |
| Pathogenic | not provided |
| Benign     | not provided |
| Pathogenic | not provided |
| Benign     | not provided |
| Pathogenic | not provided |
| Benign     | not provided |
| Benign     | not provided |
| Benign     | not provided |
| Benign     | not provided |
| Benign     | not provided |
| Benign     | not provided |
| Benign     | not provided |
| Pathogenic | not provided |
| Pathogenic | not provided |
| Benign     | not provided |
| Benign     | not provided |
| Benign     | not provided |





|      |              |            |              |
|------|--------------|------------|--------------|
| 2052 | c. 5300G>T   | Benign     | not provided |
| 2053 | c. 5300G>A   | Pathogenic | not provided |
| 2054 | c. 5299T>G   | Benign     | not provided |
| 2055 | c. 5299T>A   | Benign     | not provided |
| 2056 | c. 5298C>T   | Benign     | not provided |
| 2057 | c. 5298C>G   | Pathogenic | not provided |
| 2058 | c. 5298C>A   | Pathogenic | not provided |
| 2059 | c. 5297T>C   | Benign     | not provided |
| 2060 | c. 5296A>T   | Benign     | not provided |
| 2061 | c. 5296A>C   | Benign     | not provided |
| 2062 | c. 5295A>T   | Pathogenic | not provided |
| 2063 | c. 5295A>G   | Benign     | not provided |
| 2064 | c. 5295A>C   | Benign     | not provided |
| 2065 | c. 5294A>T   | Pathogenic | not provided |
| 2066 | c. 5294A>G   | Benign     | not provided |
| 2067 | c. 5294A>C   | Benign     | not provided |
| 2068 | c. 5293G>C   | Benign     | not provided |
| 2069 | c. 5293G>A   | Pathogenic | not provided |
| 2070 | c. 5292A>T   | Pathogenic | not provided |
| 2071 | c. 5292A>G   | Pathogenic | not provided |
| 2072 | c. 5292A>C   | Benign     | not provided |
| 2073 | c. 5291T>A   | Pathogenic | not provided |
| 2074 | c. 5290C>G   | Benign     | not provided |
| 2075 | c. 5290C>A   | Benign     | not provided |
| 2076 | c. 5288G>C   | Pathogenic | not provided |
| 2077 | c. 5286G>T   | Benign     | not provided |
| 2078 | c. 5286G>C   | Pathogenic | not provided |
| 2079 | c. 5286G>A   | Benign     | not provided |
| 2080 | c. 5284A>T   | Pathogenic | not provided |
| 2081 | c. 5284A>G   | Pathogenic | not provided |
| 2082 | c. 5284A>C   | Pathogenic | not provided |
| 2083 | c. 5283C>T   | Benign     | not provided |
| 2084 | c. 5283C>G   | Pathogenic | not provided |
| 2085 | c. 5283C>A   | Pathogenic | not provided |
| 2086 | c. 5282T>A   | Benign     | not provided |
| 2087 | c. 5281T>G   | Benign     | not provided |
| 2088 | c. 5281T>A   | Benign     | not provided |
| 2089 | c. 5280C>G   | Benign     | not provided |
| 2090 | c. 5279T>G   | Benign     | not provided |
| 2091 | c. 5279T>C   | Benign     | not provided |
| 2092 | c. 5279T>A   | Benign     | not provided |
| 2093 | c. 5278A>G   | Benign     | not provided |
| 2094 | c. 5278A>C   | Benign     | not provided |
| 2095 | c. 5278A>T   | Benign     | not provided |
| 2096 | c. 5278-2A>C | Benign     | not provided |
| 2097 | c. 5278-3C>G | Benign     | not provided |
| 2098 | c. 5278-3C>A | Pathogenic | not provided |
| 2099 | c. 5278-4C>T | Benign     | not provided |
| 2100 | c. 5278-4C>G | Benign     | not provided |
| 2101 | c. 5278-4C>A | Benign     | not provided |
| 2102 | c. 5278-5T>G | Benign     | not provided |
| 2103 | c. 5278-5T>C | Benign     | not provided |
| 2104 | c. 5278-5T>A | Benign     | not provided |
| 2105 | c. 5278-6T>G | Benign     | not provided |

|      |               |            |              |
|------|---------------|------------|--------------|
| 2106 | c. 5278-6T>A  | Benign     | not provided |
| 2107 | c. 5278-7C>T  | Benign     | not provided |
| 2108 | c. 5278-7C>G  | Benign     | not provided |
| 2109 | c. 5278-7C>A  | Benign     | not provided |
| 2110 | c. 5278-8T>G  | Benign     | not provided |
| 2111 | c. 5278-8T>C  | Benign     | not provided |
| 2112 | c. 5278-8T>A  | Benign     | not provided |
| 2113 | c. 5278-9T>G  | Benign     | not provided |
| 2114 | c. 5278-9T>C  | Benign     | not provided |
| 2115 | c. 5278-9T>A  | Benign     | not provided |
| 2116 | c. 5278-10C>T | Benign     | not provided |
| 2117 | c. 5278-10C>G | Benign     | not provided |
| 2118 | c. 5278-10C>A | Benign     | not provided |
| 2119 | c. 5278-11T>G | Benign     | not provided |
| 2120 | c. 5278-11T>A | Benign     | not provided |
| 2121 | c. 5278-12C>T | Benign     | not provided |
| 2122 | c. 5278-12C>A | Benign     | not provided |
| 2123 | c. 5278-13T>G | Benign     | not provided |
| 2124 | c. 5278-13T>C | Benign     | not provided |
| 2125 | c. 5278-13T>A | Benign     | not provided |
| 2126 | c. 5278-14C>T | Benign     | not provided |
| 2127 | c. 5278-14C>A | Benign     | not provided |
| 2128 | c. 5278-15C>T | Benign     | not provided |
| 2129 | c. 5278-15C>G | Benign     | not provided |
| 2130 | c. 5278-15C>A | Benign     | not provided |
| 2131 | c. 5278-16T>G | Benign     | not provided |
| 2132 | c. 5278-16T>A | Benign     | not provided |
| 2133 | c. 5278-17T>G | Benign     | not provided |
| 2134 | c. 5278-17T>C | Benign     | not provided |
| 2135 | c. 5278-17T>A | Benign     | not provided |
| 2136 | c. 5278-18C>T | Benign     | not provided |
| 2137 | c. 5278-18C>A | Benign     | not provided |
| 2138 | c. 5278-19T>G | Benign     | not provided |
| 2139 | c. 5278-19T>C | Benign     | not provided |
| 2140 | c. 5278-20C>G | Benign     | not provided |
| 2141 | c. 5278-20C>A | Benign     | not provided |
| 2142 | c. 5278-21T>A | Benign     | not provided |
| 2143 | c. 5278-21T>G | Benign     | not provided |
| 2144 | c. 5278-21T>C | Benign     | not provided |
| 2145 | c. 5278-22C>G | Benign     | not provided |
| 2146 | c. 5278-22C>A | Benign     | not provided |
| 2147 | c. 5277+10C>T | Benign     | not provided |
| 2148 | c. 5277+10C>G | Benign     | not provided |
| 2149 | c. 5277+9C>T  | Benign     | not provided |
| 2150 | c. 5277+9C>A  | Benign     | not provided |
| 2151 | c. 5277+8T>G  | Benign     | not provided |
| 2152 | c. 5277+8T>C  | Benign     | not provided |
| 2153 | c. 5277+8T>A  | Benign     | not provided |
| 2154 | c. 5277+7C>G  | Benign     | not provided |
| 2155 | c. 5277+7C>A  | Benign     | not provided |
| 2156 | c. 5277+6G>C  | Pathogenic | not provided |
| 2157 | c. 5277+6G>A  | Benign     | not provided |
| 2158 | c. 5277+5A>G  | Benign     | not provided |
| 2159 | c. 5277+5A>C  | Benign     | not provided |

|      |              |             |            |              |
|------|--------------|-------------|------------|--------------|
| 2160 | c. 5277+4A>C | rs80357432  | Benign     | not provided |
| 2161 | c. 5277+3A>T |             | Benign     | not provided |
| 2162 | c. 5277+2T>G |             | Pathogenic | not provided |
| 2163 | c. 5277+2T>C |             | Benign     | not provided |
| 2164 | c. 5277+2T>A |             | Pathogenic | not provided |
| 2165 | c. 5277G>C   |             | Benign     | not provided |
| 2166 | c. 5276A>T   |             | Pathogenic | not provided |
| 2167 | c. 5276A>C   |             | Benign     | not provided |
| 2168 | c. 5275A>T   |             | Pathogenic | not provided |
| 2169 | c. 5275A>G   |             | Benign     | not provided |
| 2170 | c. 5275A>C   |             | Benign     | not provided |
| 2171 | c. 5274A>T   |             | Pathogenic | not provided |
| 2172 | c. 5274A>C   |             | Benign     | not provided |
| 2173 | c. 5273G>T   |             | Pathogenic | not provided |
| 2174 | c. 5273G>C   |             | Benign     | not provided |
| 2175 | c. 5273G>A   |             | Pathogenic | not provided |
| 2176 | c. 5272A>T   |             | Pathogenic | not provided |
| 2177 | c. 5272A>C   |             | Benign     | not provided |
| 2178 | c. 5271C>T   |             | Benign     | not provided |
| 2179 | c. 5271C>G   |             | Benign     | not provided |
| 2180 | c. 5270A>T   |             | Benign     | not provided |
| 2181 | c. 5270A>G   |             | Benign     | not provided |
| 2182 | c. 5270A>C   | rs397509246 | Benign     | not provided |
| 2183 | c. 5268G>T   |             | Benign     | not provided |
| 2184 | c. 5268G>C   |             | Benign     | not provided |
| 2185 | c. 5267A>C   |             | Benign     | not provided |
| 2186 | c. 5267A>T   |             | Pathogenic | not provided |
| 2187 | c. 5266C>G   |             | Benign     | not provided |
| 2188 | c. 5266C>A   |             | Pathogenic | not provided |
| 2189 | c. 5265C>G   |             | Benign     | not provided |
| 2190 | c. 5265C>A   |             | Pathogenic | not provided |
| 2191 | c. 5264C>G   |             | Pathogenic | not provided |
| 2192 | c. 5264C>A   |             | Benign     | not provided |
| 2193 | c. 5263T>G   |             | Benign     | not provided |
| 2194 | c. 5263T>C   |             | Benign     | not provided |
| 2195 | c. 5263T>A   |             | Benign     | not provided |
| 2196 | c. 5262A>T   |             | Benign     | not provided |
| 2197 | c. 5262A>G   |             | Benign     | not provided |
| 2198 | c. 5262A>C   |             | Benign     | not provided |
| 2199 | c. 5261A>T   |             | Pathogenic | not provided |
| 2200 | c. 5261A>G   |             | Benign     | not provided |
| 2201 | c. 5261A>C   |             | Benign     | not provided |
| 2202 | c. 5260G>A   | rs397509246 | Pathogenic | not provided |
| 2203 | c. 5259A>C   |             | Benign     | not provided |
| 2204 | c. 5258G>T   |             | Pathogenic | not provided |
| 2205 | c. 5258G>A   |             | Pathogenic | not provided |
| 2206 | c. 5257A>T   |             | Pathogenic | not provided |
| 2207 | c. 5257A>C   |             | Benign     | not provided |
| 2208 | c. 5256A>T   |             | Pathogenic | not provided |
| 2209 | c. 5256A>G   |             | Benign     | not provided |
| 2210 | c. 5255C>A   |             | Benign     | not provided |
| 2211 | c. 5254G>T   |             | Benign     | not provided |
| 2212 | c. 5253A>T   |             | Pathogenic | not provided |
| 2213 | c. 5253A>G   |             | Pathogenic | not provided |

|      |            |             |            |              |
|------|------------|-------------|------------|--------------|
| 2214 | c. 5253A>C |             | Benign     | not provided |
| 2215 | c. 5250G>T |             | Benign     | not provided |
| 2216 | c. 5250G>C |             | Benign     | not provided |
| 2217 | c. 5249A>T |             | Pathogenic | not provided |
| 2218 | c. 5249A>G |             | Benign     | not provided |
| 2219 | c. 5249A>C |             | Benign     | not provided |
| 2220 | c. 5248A>T |             | Pathogenic | not provided |
| 2221 | c. 5248A>G |             | Benign     | not provided |
| 2222 | c. 5248A>C |             | Benign     | not provided |
| 2223 | c. 5247A>T |             | Pathogenic | not provided |
| 2224 | c. 5247A>G |             | Benign     | not provided |
| 2225 | c. 5247A>C |             | Benign     | not provided |
| 2226 | c. 5246C>A |             | Benign     | not provided |
| 2227 | c. 5245C>T |             | Benign     | not provided |
| 2228 | c. 5245C>G | rs397509244 | Benign     | not provided |
| 2229 | c. 5244T>G |             | Benign     | not provided |
| 2230 | c. 5244T>C |             | Benign     | not provided |
| 2231 | c. 5244T>A |             | Benign     | not provided |
| 2232 | c. 5243G>C |             | Benign     | not provided |
| 2233 | c. 5242G>A | rs397507245 | Pathogenic | not provided |
| 2234 | c. 5241A>T |             | Pathogenic | not provided |
| 2235 | c. 5241A>G |             | Benign     | not provided |
| 2236 | c. 5241A>C | rs397509242 | Benign     | not provided |
| 2237 | c. 5240A>T |             | Pathogenic | not provided |
| 2238 | c. 5240A>G |             | Benign     | not provided |
| 2239 | c. 5240A>C |             | Benign     | not provided |
| 2240 | c. 5239C>G |             | Benign     | not provided |
| 2241 | c. 5239C>A |             | Benign     | not provided |
| 2242 | c. 5238C>T |             | Benign     | not provided |
| 2243 | c. 5238C>A |             | Benign     | not provided |
| 2244 | c. 5237A>T |             | Benign     | not provided |
| 2245 | c. 5237A>G |             | Benign     | not provided |
| 2246 | c. 5235C>G |             | Benign     | not provided |
| 2247 | c. 5235C>A |             | Benign     | not provided |
| 2248 | c. 5235C>T |             | Benign     | not provided |
| 2249 | c. 5234A>T |             | Benign     | not provided |
| 2250 | c. 5234A>C |             | Benign     | not provided |
| 2251 | c. 5233A>T |             | Pathogenic | not provided |
| 2252 | c. 5233A>G |             | Benign     | not provided |
| 2253 | c. 5233A>C |             | Benign     | not provided |
| 2254 | c. 5232A>T |             | Pathogenic | not provided |
| 2255 | c. 5232A>G |             | Benign     | not provided |
| 2256 | c. 5232A>C |             | Benign     | not provided |
| 2257 | c. 5231G>T |             | Pathogenic | not provided |
| 2258 | c. 5231G>C |             | Benign     | not provided |
| 2259 | c. 5230A>T |             | Pathogenic | not provided |
| 2260 | c. 5230A>G |             | Benign     | not provided |
| 2261 | c. 5230A>C |             | Benign     | not provided |
| 2262 | c. 5229A>T |             | Pathogenic | not provided |
| 2263 | c. 5229A>G |             | Benign     | not provided |
| 2264 | c. 5229A>C |             | Benign     | not provided |
| 2265 | c. 5228G>T |             | Pathogenic | not provided |
| 2266 | c. 5228G>A |             | Pathogenic | not provided |
| 2267 | c. 5227G>C |             | Benign     | not provided |

|      |            |            |              |
|------|------------|------------|--------------|
| 2268 | c. 5227G>A | Pathogenic | not provided |
| 2269 | c. 5226T>G | Benign     | not provided |
| 2270 | c. 5226T>C | Benign     | not provided |
| 2271 | c. 5226T>A | Benign     | not provided |
| 2272 | c. 5225A>T | Benign     | not provided |
| 2273 | c. 5225A>C | Benign     | not provided |
| 2274 | c. 5224A>T | Pathogenic | not provided |
| 2275 | c. 5224A>C | Benign     | not provided |
| 2276 | c. 5223C>T | Benign     | not provided |
| 2277 | c. 5223C>G | Pathogenic | not provided |
| 2278 | c. 5223C>A | Pathogenic | not provided |
| 2279 | c. 5222T>C | Benign     | not provided |
| 2280 | c. 5222T>A | Benign     | not provided |
| 2281 | c. 5221G>C | Benign     | not provided |
| 2282 | c. 5219T>G | Benign     | not provided |
| 2283 | c. 5218G>C | Benign     | not provided |
| 2284 | c. 5217T>C | Benign     | not provided |
| 2285 | c. 5217T>A | Benign     | not provided |
| 2286 | c. 5216A>C | Benign     | not provided |
| 2287 | c. 5214A>T | Pathogenic | not provided |
| 2288 | c. 5214A>G | Pathogenic | not provided |
| 2289 | c. 5214A>C | Benign     | not provided |
| 2290 | c. 5213G>C | Benign     | not provided |
| 2291 | c. 5212G>C | Benign     | not provided |
| 2292 | c. 5211A>C | Benign     | not provided |
| 2293 | c. 5211A>T | Pathogenic | not provided |
| 2294 | c. 5210G>T | Pathogenic | not provided |
| 2295 | c. 5210G>C | Benign     | not provided |
| 2296 | c. 5210G>A | Pathogenic | not provided |
| 2297 | c. 5209A>G | Pathogenic | not provided |
| 2298 | c. 5209A>C | Benign     | not provided |
| 2299 | c. 5208C>T | Benign     | not provided |
| 2300 | c. 5208C>G | Pathogenic | not provided |
| 2301 | c. 5208C>A | Pathogenic | not provided |
| 2302 | c. 5207T>A | Benign     | not provided |
| 2303 | c. 5206G>T | Benign     | not provided |
| 2304 | c. 5206G>C | Benign     | not provided |
| 2305 | c. 5206G>A | Benign     | not provided |
| 2306 | c. 5205A>G | Benign     | not provided |
| 2307 | c. 5205A>C | Benign     | not provided |
| 2308 | c. 5204A>T | Pathogenic | not provided |
| 2309 | c. 5204A>G | Benign     | not provided |
| 2310 | c. 5204A>C | Benign     | not provided |
| 2311 | c. 5203G>T | Pathogenic | not provided |
| 2312 | c. 5203G>C | Benign     | not provided |
| 2313 | c. 5203G>A | Pathogenic | not provided |
| 2314 | c. 5202T>A | Pathogenic | not provided |
| 2315 | c. 5201T>A | Benign     | not provided |
| 2316 | c. 5201T>C | Benign     | not provided |
| 2317 | c. 5200T>G | Benign     | not provided |
| 2318 | c. 5199T>G | Benign     | not provided |
| 2319 | c. 5199T>C | Benign     | not provided |
| 2320 | c. 5199T>A | Benign     | not provided |
| 2321 | c. 5198A>C | Benign     | not provided |



|      |               |            |              |
|------|---------------|------------|--------------|
| 2322 | c. 5197G>T    | Pathogenic | not provided |
| 2323 | c. 5196T>G    | Benign     | not provided |
| 2324 | c. 5195A>T    | Benign     | not provided |
| 2325 | c. 5195A>C    | Benign     | not provided |
| 2326 | c. 5194C>T    | Benign     | not provided |
| 2327 | c. 5194C>G    | Benign     | not provided |
| 2328 | c. 5194C>A    | Benign     | not provided |
| 2329 | c. 5194-2A>T  | Pathogenic | not provided |
| 2330 | c. 5194-3C>T  | Benign     | not provided |
| 2331 | c. 5194-3C>G  | Pathogenic | not provided |
| 2332 | c. 5194-3C>A  | Pathogenic | not provided |
| 2333 | c. 5194-4T>A  | Benign     | not provided |
| 2334 | c. 5194-4T>G  | Benign     | not provided |
| 2335 | c. 5194-5T>G  | Benign     | not provided |
| 2336 | c. 5194-5T>C  | Benign     | not provided |
| 2337 | c. 5194-5T>A  | Benign     | not provided |
| 2338 | c. 5194-6T>G  | Benign     | not provided |
| 2339 | c. 5194-6T>C  | Benign     | not provided |
| 2340 | c. 5194-6T>A  | Benign     | not provided |
| 2341 | c. 5194-7C>T  | Benign     | not provided |
| 2342 | c. 5194-7C>G  | Benign     | not provided |
| 2343 | c. 5194-7C>A  | Benign     | not provided |
| 2344 | c. 5194-8T>G  | Benign     | not provided |
| 2345 | c. 5194-8T>C  | Benign     | not provided |
| 2346 | c. 5194-8T>A  | Benign     | not provided |
| 2347 | c. 5194-9T>G  | Benign     | not provided |
| 2348 | c. 5194-9T>C  | Benign     | not provided |
| 2349 | c. 5194-9T>A  | Pathogenic | not provided |
| 2350 | c. 5194-10T>G | Benign     | not provided |
| 2351 | c. 5194-10T>A | Benign     | not provided |
| 2352 | c. 5193+30A>T | Pathogenic | not provided |
| 2353 | c. 5193+30A>G | Pathogenic | not provided |
| 2354 | c. 5193+30A>C | Benign     | not provided |
| 2355 | c. 5193+29G>T | Pathogenic | not provided |
| 2356 | c. 5193+29G>C | Benign     | not provided |
| 2357 | c. 5193+29G>A | Pathogenic | not provided |
| 2358 | c. 5193+28A>T | Pathogenic | not provided |
| 2359 | c. 5193+28A>G | Pathogenic | not provided |
| 2360 | c. 5193+28A>C | Benign     | not provided |
| 2361 | c. 5193+27C>G | Benign     | not provided |
| 2362 | c. 5193+26C>T | Benign     | not provided |
| 2363 | c. 5193+26C>G | Benign     | not provided |
| 2364 | c. 5193+26C>A | Benign     | not provided |
| 2365 | c. 5193+25A>T | Benign     | not provided |
| 2366 | c. 5193+25A>G | Benign     | not provided |
| 2367 | c. 5193+25A>C | Benign     | not provided |
| 2368 | c. 5193+24A>T | Benign     | not provided |
| 2369 | c. 5193+24A>G | Pathogenic | not provided |
| 2370 | c. 5193+24A>C | Benign     | not provided |
| 2371 | c. 5193+23T>G | Benign     | not provided |
| 2372 | c. 5193+23T>C | Benign     | not provided |
| 2373 | c. 5193+23T>A | Benign     | not provided |
| 2374 | c. 5193+22C>G | Benign     | not provided |
| 2375 | c. 5193+22C>A | Benign     | not provided |

|      |               |            |              |
|------|---------------|------------|--------------|
| 2376 | c. 5193+21A>T | Benign     | not provided |
| 2377 | c. 5193+21A>G | Benign     | not provided |
| 2378 | c. 5193+21A>C | Benign     | not provided |
| 2379 | c. 5193+20A>T | Pathogenic | not provided |
| 2380 | c. 5193+20A>C | Benign     | not provided |
| 2381 | c. 5193+19A>T | Pathogenic | not provided |
| 2382 | c. 5193+19A>C | Benign     | not provided |
| 2383 | c. 5193+18C>T | Benign     | not provided |
| 2384 | c. 5193+18C>G | Benign     | not provided |
| 2385 | c. 5193+18C>A | Benign     | not provided |
| 2386 | c. 5193+17A>T | Benign     | not provided |
| 2387 | c. 5193+17A>G | Pathogenic | not provided |
| 2388 | c. 5193+17A>C | Benign     | not provided |
| 2389 | c. 5193+16T>G | Benign     | not provided |
| 2390 | c. 5193+16T>C | Benign     | not provided |
| 2391 | c. 5193+16T>A | Benign     | not provided |
| 2392 | c. 5193+15T>A | Benign     | not provided |
| 2393 | c. 5193+15T>G | Benign     | not provided |
| 2394 | c. 5193+15T>C | Benign     | not provided |
| 2395 | c. 5193+14G>T | Benign     | not provided |
| 2396 | c. 5193+14G>C | Benign     | not provided |
| 2397 | c. 5193+14G>A | Pathogenic | not provided |
| 2398 | c. 5193+13T>G | Benign     | not provided |
| 2399 | c. 5193+13T>C | Benign     | not provided |
| 2400 | c. 5193+12A>T | Benign     | not provided |
| 2401 | c. 5193+12A>G | Benign     | not provided |
| 2402 | c. 5193+12A>C | Benign     | not provided |
| 2403 | c. 5193+11G>C | Benign     | not provided |
| 2404 | c. 5193+11G>A | Pathogenic | not provided |
| 2405 | c. 5193+10T>G | Benign     | not provided |
| 2406 | c. 5193+10T>A | Benign     | not provided |
| 2407 | c. 5193+9T>G  | Pathogenic | not provided |
| 2408 | c. 5193+9T>C  | Benign     | not provided |
| 2409 | c. 5193+9T>A  | Benign     | not provided |
| 2410 | c. 5193+8C>T  | Benign     | not provided |
| 2411 | c. 5193+8C>G  | Benign     | not provided |
| 2412 | c. 5193+7A>T  | Benign     | not provided |
| 2413 | c. 5193+7A>G  | Pathogenic | not provided |
| 2414 | c. 5193+7A>C  | Benign     | not provided |
| 2415 | c. 5193+6T>G  | Benign     | not provided |
| 2416 | c. 5193+6T>A  | Benign     | not provided |
| 2417 | c. 5193+5G>T  | Benign     | not provided |
| 2418 | c. 5193+5G>C  | Benign     | not provided |
| 2419 | c. 5193+5G>A  | Pathogenic | not provided |
| 2420 | c. 5193+4A>G  | Benign     | not provided |
| 2421 | c. 5193+4A>C  | Benign     | not provided |
| 2422 | c. 5193+4A>T  | Pathogenic | not provided |
| 2423 | c. 5193+3A>T  | Benign     | not provided |
| 2424 | c. 5193+3A>C  | Benign     | not provided |
| 2425 | c. 5193+2T>C  | Benign     | not provided |
| 2426 | c. 5193+2T>A  | Pathogenic | not provided |
| 2427 | c. 5193G>T    | Benign     | not provided |
| 2428 | c. 5193G>C    | Benign     | not provided |
| 2429 | c. 5192A>T    | Pathogenic | not provided |

|      |            |            |              |
|------|------------|------------|--------------|
| 2430 | c. 5192A>G | Pathogenic | not provided |
| 2431 | c. 5192A>C | Benign     | not provided |
| 2432 | c. 5191G>C | Benign     | not provided |
| 2433 | c. 5190T>G | Benign     | not provided |
| 2434 | c. 5190T>C | Benign     | not provided |
| 2435 | c. 5190T>A | Benign     | not provided |
| 2436 | c. 5189A>C | Benign     | not provided |
| 2437 | c. 5188A>T | Pathogenic | not provided |
| 2438 | c. 5188A>G | Benign     | not provided |
| 2439 | c. 5188A>C | Benign     | not provided |
| 2440 | c. 5187G>T | Pathogenic | not provided |
| 2441 | c. 5187G>C | Benign     | not provided |
| 2442 | c. 5187G>A | Pathogenic | not provided |
| 2443 | c. 5186T>G | Benign     | not provided |
| 2444 | c. 5185C>G | Benign     | not provided |
| 2445 | c. 5185C>A | Benign     | not provided |
| 2446 | c. 5184G>T | Benign     | not provided |
| 2447 | c. 5184G>C | Benign     | not provided |
| 2448 | c. 5184G>A | Pathogenic | not provided |
| 2449 | c. 5183T>G | Benign     | not provided |
| 2450 | c. 5183T>C | Benign     | not provided |
| 2451 | c. 5183T>A | Benign     | not provided |
| 2452 | c. 5182A>T | Benign     | not provided |
| 2453 | c. 5182A>G | Benign     | not provided |
| 2454 | c. 5182A>C | Benign     | not provided |
| 2455 | c. 5181A>T | Pathogenic | not provided |
| 2456 | c. 5181A>G | Benign     | not provided |
| 2457 | c. 5181A>C | Benign     | not provided |
| 2458 | c. 5180A>T | Pathogenic | not provided |
| 2459 | c. 5180A>G | Benign     | not provided |
| 2460 | c. 5180A>C | Benign     | not provided |
| 2461 | c. 5179A>G | Benign     | not provided |
| 2462 | c. 5178A>T | Pathogenic | not provided |
| 2463 | c. 5178A>G | Benign     | not provided |
| 2464 | c. 5178A>C | Benign     | not provided |
| 2465 | c. 5177G>A | Pathogenic | not provided |
| 2466 | c. 5176A>C | Benign     | not provided |
| 2467 | c. 5175A>T | Pathogenic | not provided |
| 2468 | c. 5174A>T | Pathogenic | not provided |
| 2469 | c. 5174A>G | Benign     | not provided |
| 2470 | c. 5174A>C | Benign     | not provided |
| 2471 | c. 5173G>C | Benign     | not provided |
| 2472 | c. 5173G>A | Pathogenic | not provided |
| 2473 | c. 5172A>T | Pathogenic | not provided |
| 2474 | c. 5172A>G | Benign     | not provided |
| 2475 | c. 5171A>T | Pathogenic | not provided |
| 2476 | c. 5171A>G | Benign     | not provided |
| 2477 | c. 5171A>C | Benign     | not provided |
| 2478 | c. 5170A>T | Benign     | not provided |
| 2479 | c. 5170A>G | Pathogenic | not provided |
| 2480 | c. 5170A>C | Benign     | not provided |
| 2481 | c. 5169T>G | Pathogenic | not provided |
| 2482 | c. 5169T>C | Benign     | not provided |
| 2483 | c. 5169T>A | Benign     | not provided |



|      |               |            |              |
|------|---------------|------------|--------------|
| 2538 | c. 5153-16T>A | Benign     | not provided |
| 2539 | c. 5153-17T>G | Benign     | not provided |
| 2540 | c. 5153-17T>C | Benign     | not provided |
| 2541 | c. 5153-17T>A | Pathogenic | not provided |
| 2542 | c. 5153-18T>G | Benign     | not provided |
| 2543 | c. 5153-18T>C | Benign     | not provided |
| 2544 | c. 5153-18T>A | Benign     | not provided |
| 2545 | c. 5153-19T>G | Benign     | not provided |
| 2546 | c. 5153-19T>C | Benign     | not provided |
| 2547 | c. 5153-19T>A | Benign     | not provided |
| 2548 | c. 5153-20C>T | Benign     | not provided |
| 2549 | c. 5153-20C>G | Benign     | not provided |
| 2550 | c. 5153-20C>A | Pathogenic | not provided |
| 2551 | c. 5153-21T>G | Benign     | not provided |
| 2552 | c. 5153-21T>C | Benign     | not provided |
| 2553 | c. 5153-21T>A | Benign     | not provided |
| 2554 | c. 5153-22G>A | Pathogenic | not provided |
| 2555 | c. 5153-22G>T | Benign     | not provided |
| 2556 | c. 5153-22G>C | Benign     | not provided |
| 2557 | c. 5153-23T>G | Benign     | not provided |
| 2558 | c. 5153-23T>C | Benign     | not provided |
| 2559 | c. 5153-23T>A | Benign     | not provided |
| 2560 | c. 5153-24C>T | Benign     | not provided |
| 2561 | c. 5153-24C>G | Benign     | not provided |
| 2562 | c. 5153-24C>A | Benign     | not provided |
| 2563 | c. 5153-25C>T | Benign     | not provided |
| 2564 | c. 5153-25C>G | Benign     | not provided |
| 2565 | c. 5153-25C>A | Benign     | not provided |
| 2566 | c. 5153-26A>T | Benign     | not provided |
| 2567 | c. 5153-26A>C | Benign     | not provided |
| 2568 | c. 5153-27A>T | Benign     | not provided |
| 2569 | c. 5153-27A>G | Pathogenic | not provided |
| 2570 | c. 5153-27A>C | Benign     | not provided |
| 2571 | c. 5153-28T>G | Benign     | not provided |
| 2572 | c. 5153-28T>C | Benign     | not provided |
| 2573 | c. 5153-28T>A | Benign     | not provided |
| 2574 | c. 5153-29G>T | Benign     | not provided |
| 2575 | c. 5153-29G>C | Benign     | not provided |
| 2576 | c. 5153-29G>A | Pathogenic | not provided |
| 2577 | c. 5153-30T>G | Benign     | not provided |
| 2578 | c. 5153-30T>C | Benign     | not provided |
| 2579 | c. 5153-30T>A | Benign     | not provided |
| 2580 | c. 5152+10A>T | Pathogenic | not provided |
| 2581 | c. 5152+10A>C | Benign     | not provided |
| 2582 | c. 5152+8T>A  | Benign     | not provided |
| 2583 | c. 5152+8T>G  | Benign     | not provided |
| 2584 | c. 5152+7A>T  | Benign     | not provided |
| 2585 | c. 5152+7A>C  | Benign     | not provided |
| 2586 | c. 5152+5G>T  | Benign     | not provided |
| 2587 | c. 5152+4A>T  | Pathogenic | not provided |
| 2588 | c. 5152+4A>C  | Benign     | not provided |
| 2589 | c. 5152+3A>T  | Benign     | not provided |
| 2590 | c. 5152+3A>G  | Pathogenic | not provided |
| 2591 | c. 5152T>C    | Benign     | not provided |





2646 c. 5124G>C  
2647 c. 5123C>G  
2648 c. 5122G>T  
2649 c. 5122G>C  
2650 c. 5121T>G  
2651 c. 5121T>C  
2652 c. 5121T>A  
2653 c. 5120T>A  
2654 c. 5119A>T  
2655 c. 5119A>G  
2656 c. 5118A>T  
2657 c. 5118A>G  
2658 c. 5118A>C  
2659 c. 5117G>T  
2660 c. 5116G>T  
2661 c. 5115A>T  
2662 c. 5115A>G  
2663 c. 5114T>A  
2664 c. 5113C>A  
2665 c. 5112T>G  
2666 c. 5112T>C  
2667 c. 5112T>A  
2668 c. 5111T>G  
2669 c. 5111T>C  
2670 c. 5110T>G  
2671 c. 5110T>A  
2672 c. 5109T>A  
2673 c. 5108A>T  
2674 c. 5108A>C  
2675 c. 5107T>A  
2676 c. 5106A>T  
2677 c. 5106A>C  
2678 c. 5105A>T  
2679 c. 5105A>G  
2680 c. 5105A>C  
2681 c. 5104A>T  
2682 c. 5104A>G  
2683 c. 5104A>C  
2684 c. 5103G>T  
2685 c. 5103G>C  
2686 c. 5102T>G  
2687 c. 5102T>A  
2688 c. 5101C>T  
2689 c. 5101C>G  
2690 c. 5100A>T  
2691 c. 5100A>C  
2692 c. 5099C>A  
2693 c. 5099C>T  
2694 c. 5099C>G  
2695 c. 5095C>G  
2696 c. 5094A>T  
2697 c. 5094A>C  
2698 c. 5093A>T  
2699 c. 5093A>G

|            |              |
|------------|--------------|
| Benign     | not provided |
| Benign     | not provided |
| Benign     | not provided |
| Benign     | not provided |
| Benign     | not provided |
| Benign     | not provided |
| Pathogenic | not provided |
| Benign     | not provided |
| Benign     | not provided |
| Benign     | not provided |
| Pathogenic | not provided |
| Benign     | not provided |
| Benign     | not provided |
| Pathogenic | not provided |
| Pathogenic | not provided |
| Pathogenic | not provided |
| Benign     | not provided |
| Pathogenic | not provided |
| Benign     | not provided |
| Benign     | not provided |
| Benign     | not provided |
| Benign     | not provided |
| Pathogenic | not provided |
| Pathogenic | not provided |
| Benign     | not provided |
| Benign     | not provided |
| Benign     | not provided |
| Benign     | not provided |
| Benign     | not provided |
| Benign     | not provided |
| Pathogenic | not provided |
| Benign     | not provided |
| Benign     | not provided |
| Pathogenic | not provided |
| Benign     | not provided |
| Benign     | not provided |
| Benign     | not provided |
| Benign     | not provided |
| Benign     | not provided |
| Benign     | not provided |
| Benign     | not provided |
| Benign     | not provided |
| Benign     | not provided |
| Benign     | not provided |
| Benign     | not provided |
| Benign     | not provided |
| Benign     | not provided |
| Benign     | not provided |
| Benign     | not provided |
| Benign     | not provided |
| Pathogenic | not provided |
| Benign     | not provided |

|      |               |            |              |
|------|---------------|------------|--------------|
| 2700 | c. 5093A>C    | Benign     | not provided |
| 2701 | c. 5092G>T    | Pathogenic | not provided |
| 2702 | c. 5092G>C    | Benign     | not provided |
| 2703 | c. 5092G>A    | Pathogenic | not provided |
| 2704 | c. 5091T>C    | Benign     | not provided |
| 2705 | c. 5091T>A    | Benign     | not provided |
| 2706 | c. 5090G>T    | Benign     | not provided |
| 2707 | c. 5090G>C    | Pathogenic | not provided |
| 2708 | c. 5089T>G    | Benign     | not provided |
| 2709 | c. 5088G>T    | Benign     | not provided |
| 2710 | c. 5088G>C    | Pathogenic | not provided |
| 2711 | c. 5087T>G    | Benign     | not provided |
| 2712 | c. 5087T>A    | Benign     | not provided |
| 2713 | c. 5085T>G    | Benign     | not provided |
| 2714 | c. 5085T>C    | Benign     | not provided |
| 2715 | c. 5084T>G    | Benign     | not provided |
| 2716 | c. 5084T>C    | Benign     | not provided |
| 2717 | c. 5084T>A    | Pathogenic | not provided |
| 2718 | c. 5083T>G    | Benign     | not provided |
| 2719 | c. 5083T>C    | Benign     | not provided |
| 2720 | c. 5083T>A    | Benign     | not provided |
| 2721 | c. 5082G>T    | Benign     | not provided |
| 2722 | c. 5082G>C    | Benign     | not provided |
| 2723 | c. 5082G>A    | Benign     | not provided |
| 2724 | c. 5081A>T    | Pathogenic | not provided |
| 2725 | c. 5081A>C    | Benign     | not provided |
| 2726 | c. 5080G>C    | Benign     | not provided |
| 2727 | c. 5079T>G    | Benign     | not provided |
| 2728 | c. 5079T>C    | Benign     | not provided |
| 2729 | c. 5079T>A    | Benign     | not provided |
| 2730 | c. 5078C>G    | Benign     | not provided |
| 2731 | c. 5078C>A    | Benign     | not provided |
| 2732 | c. 5077G>T    | Benign     | not provided |
| 2733 | c. 5077G>C    | Benign     | not provided |
| 2734 | c. 5077G>A    | Pathogenic | not provided |
| 2735 | c. 5076T>G    | Benign     | not provided |
| 2736 | c. 5076T>C    | Benign     | not provided |
| 2737 | c. 5076T>A    | Benign     | not provided |
| 2738 | c. 5075A>G    | Benign     | not provided |
| 2739 | c. 5075-3C>A  | Benign     | not provided |
| 2740 | c. 5075-4G>C  | Benign     | not provided |
| 2741 | c. 5075-5T>G  | Benign     | not provided |
| 2742 | c. 5075-5T>C  | Benign     | not provided |
| 2743 | c. 5075-5T>A  | Benign     | not provided |
| 2744 | c. 5075-6C>G  | Benign     | not provided |
| 2745 | c. 5075-7T>G  | Pathogenic | not provided |
| 2746 | c. 5075-7T>A  | Benign     | not provided |
| 2747 | c. 5075-8T>C  | Benign     | not provided |
| 2748 | c. 5075-8T>A  | Benign     | not provided |
| 2749 | c. 5075-10C>T | Benign     | not provided |
| 2750 | c. 5075-10C>G | Benign     | not provided |
| 2751 | c. 5075-10C>A | Benign     | not provided |
| 2752 | c. 5074+10G>T | Pathogenic | not provided |
| 2753 | c. 5074+10G>C | Benign     | not provided |

|      |               |             |            |              |
|------|---------------|-------------|------------|--------------|
| 2754 | c. 5074+10G>A | rs80357034  | Pathogenic | not provided |
| 2755 | c. 5074+9A>T  |             | Pathogenic | not provided |
| 2756 | c. 5074+9A>G  |             | Benign     | not provided |
| 2757 | c. 5074+9A>C  |             | Benign     | not provided |
| 2758 | c. 5074+8A>T  |             | Pathogenic | not provided |
| 2759 | c. 5074+8A>G  |             | Benign     | not provided |
| 2760 | c. 5074+8A>C  |             | Benign     | not provided |
| 2761 | c. 5074+7C>G  |             | Benign     | not provided |
| 2762 | c. 5074+7C>A  |             | Benign     | not provided |
| 2763 | c. 5074+6C>T  |             | Benign     | not provided |
| 2764 | c. 5074+6C>A  |             | Pathogenic | not provided |
| 2765 | c. 5074+5A>G  |             | Pathogenic | not provided |
| 2766 | c. 5074+5A>C  |             | Benign     | not provided |
| 2767 | c. 5074+4T>G  |             | Benign     | not provided |
| 2768 | c. 5074+3A>T  |             | Benign     | not provided |
| 2769 | c. 5074+3A>C  |             | Benign     | not provided |
| 2770 | c. 5074+2T>G  |             | Pathogenic | not provided |
| 2771 | c. 5072C>G    |             | Benign     | not provided |
| 2772 | c. 5071A>T    |             | Benign     | not provided |
| 2773 | c. 5071A>C    |             | Benign     | not provided |
| 2774 | c. 5070A>T    |             | Pathogenic | not provided |
| 2775 | c. 5070A>G    |             | Benign     | not provided |
| 2776 | c. 5070A>C    |             | Benign     | not provided |
| 2777 | c. 5069A>T    |             | Pathogenic | not provided |
| 2778 | c. 5069A>G    |             | Benign     | not provided |
| 2779 | c. 5069A>C    |             | Benign     | not provided |
| 2780 | c. 5068A>G    |             | Benign     | not provided |
| 2781 | c. 5067G>T    |             | Pathogenic | not provided |
| 2782 | c. 5067G>C    |             | Benign     | not provided |
| 2783 | c. 5066T>A    |             | Benign     | not provided |
| 2784 | c. 5065A>T    |             | Benign     | not provided |
| 2785 | c. 5064T>G    |             | Benign     | not provided |
| 2786 | c. 5064T>A    |             | Benign     | not provided |
| 2787 | c. 5063T>A    |             | Benign     | not provided |
| 2788 | c. 5063T>G    |             | Benign     | not provided |
| 2789 | c. 5062G>T    |             | Benign     | not provided |
| 2790 | c. 5062G>C    |             | Benign     | not provided |
| 2791 | c. 5062G>A    |             | Pathogenic | not provided |
| 2792 | c. 5061T>G    |             | Benign     | not provided |
| 2793 | c. 5061T>A    |             | Pathogenic | not provided |
| 2794 | c. 5060T>C    |             | Benign     | not provided |
| 2795 | c. 5060T>A    |             | Benign     | not provided |
| 2796 | c. 5059G>T    |             | Benign     | not provided |
| 2797 | c. 5059G>C    |             | Benign     | not provided |
| 2798 | c. 5059G>A    |             | Pathogenic | not provided |
| 2799 | c. 5058T>G    | rs397509218 | Benign     | not provided |
| 2800 | c. 5058T>A    |             | Benign     | not provided |
| 2801 | c. 5057A>T    |             | Benign     | not provided |
| 2802 | c. 5056C>G    |             | Benign     | not provided |
| 2803 | c. 5056C>A    |             | Benign     | not provided |
| 2804 | c. 5055T>C    |             | Benign     | not provided |
| 2805 | c. 5055T>A    |             | Benign     | not provided |
| 2806 | c. 5054C>G    |             | Benign     | not provided |
| 2807 | c. 5054C>A    |             | Benign     | not provided |







|      |               |             |            |              |
|------|---------------|-------------|------------|--------------|
| 2916 | c. 5000A>T    | rs397509215 | Pathogenic | not provided |
| 2917 | c. 5000A>C    |             | Benign     | not provided |
| 2918 | c. 4999A>C    |             | Benign     | not provided |
| 2919 | c. 4998C>G    |             | Benign     | not provided |
| 2920 | c. 4997A>T    |             | Benign     | not provided |
| 2921 | c. 4997A>C    |             | Benign     | not provided |
| 2922 | c. 4996T>G    |             | Benign     | not provided |
| 2923 | c. 4996T>A    |             | Benign     | not provided |
| 2924 | c. 4996T>C    |             | Benign     | not provided |
| 2925 | c. 4995G>C    |             | Benign     | not provided |
| 2926 | c. 4995G>A    |             | Pathogenic | not provided |
| 2927 | c. 4995G>T    |             | Benign     | not provided |
| 2928 | c. 4994T>C    |             | Benign     | not provided |
| 2929 | c. 4994T>A    |             | Benign     | not provided |
| 2930 | c. 4992C>G    |             | Benign     | not provided |
| 2931 | c. 4991T>G    |             | Benign     | not provided |
| 2932 | c. 4991T>A    |             | Pathogenic | not provided |
| 2933 | c. 4990C>T    |             | Benign     | not provided |
| 2934 | c. 4990C>G    |             | Benign     | not provided |
| 2935 | c. 4990C>A    |             | Benign     | not provided |
| 2936 | c. 4989G>T    |             | Benign     | not provided |
| 2937 | c. 4989G>C    |             | Benign     | not provided |
| 2938 | c. 4989G>A    |             | Pathogenic | not provided |
| 2939 | c. 4988T>G    |             | Benign     | not provided |
| 2940 | c. 4988T>C    |             | Benign     | not provided |
| 2941 | c. 4987A>G    |             | Benign     | not provided |
| 2942 | c. 4987A>C    |             | Benign     | not provided |
| 2943 | c. 4987-2A>T  |             | Pathogenic | not provided |
| 2944 | c. 4987-3C>A  |             | Pathogenic | not provided |
| 2945 | c. 4987-4T>C  |             | Benign     | not provided |
| 2946 | c. 4987-4T>A  |             | Benign     | not provided |
| 2947 | c. 4987-5T>G  |             | Pathogenic | not provided |
| 2948 | c. 4987-6T>G  |             | Benign     | not provided |
| 2949 | c. 4987-6T>C  |             | Benign     | not provided |
| 2950 | c. 4987-6T>A  |             | Benign     | not provided |
| 2951 | c. 4987-7A>T  |             | Pathogenic | not provided |
| 2952 | c. 4987-7A>G  |             | Benign     | not provided |
| 2953 | c. 4987-7A>C  |             | Benign     | not provided |
| 2954 | c. 4987-8A>T  |             | Pathogenic | not provided |
| 2955 | c. 4987-8A>C  |             | Benign     | not provided |
| 2956 | c. 4987-9T>G  |             | Benign     | not provided |
| 2957 | c. 4987-9T>C  |             | Benign     | not provided |
| 2958 | c. 4987-9T>A  |             | Benign     | not provided |
| 2959 | c. 4987-10T>C |             | Benign     | not provided |
| 2960 | c. 4987-10T>A |             | Pathogenic | not provided |
| 2961 | c. 4986+10T>G |             | Benign     | not provided |
| 2962 | c. 4986+10T>C |             | Benign     | not provided |
| 2963 | c. 4986+10T>A |             | Benign     | not provided |
| 2964 | c. 4986+9A>G  |             | Pathogenic | not provided |
| 2965 | c. 4986+9A>C  |             | Benign     | not provided |
| 2966 | c. 4986+8T>G  |             | Benign     | not provided |
| 2967 | c. 4986+8T>C  |             | Benign     | not provided |
| 2968 | c. 4986+8T>A  |             | Benign     | not provided |
| 2969 | c. 4986+7G>T  |             | Benign     | not provided |





3078 c. 4943A>C  
3079 c. 4942A>C  
3080 c. 4941C>T  
3081 c. 4941C>G  
3082 c. 4940A>T  
3083 c. 4940A>G  
3084 c. 4940A>C  
3085 c. 4939A>T  
3086 c. 4939A>G  
3087 c. 4939A>C  
3088 c. 4938C>T  
3089 c. 4938C>G  
3090 c. 4938C>A  
3091 c. 4937T>C  
3092 c. 4937T>A  
3093 c. 4937T>G  
3094 c. 4936G>T  
3095 c. 4936G>C  
3096 c. 4936G>A  
3097 c. 4935G>T  
3098 c. 4935G>A  
3099 c. 4934G>A  
3100 c. 4933A>T  
3101 c. 4933A>C  
3102 c. 4932A>T  
3103 c. 4932A>G  
3104 c. 4932A>C  
3105 c. 4931A>T  
3106 c. 4931A>C  
3107 c. 4930G>A  
3108 c. 4929A>T  
3109 c. 4929A>G  
3110 c. 4928C>T  
3111 c. 4928C>G  
3112 c. 4928C>A  
3113 c. 4927A>T  
3114 c. 4927A>G  
3115 c. 4927A>C  
3116 c. 4926A>T  
3117 c. 4926A>G  
3118 c. 4926A>C  
3119 c. 4925C>T  
3120 c. 4925C>G  
3121 c. 4925C>A  
3122 c. 4924T>G  
3123 c. 4924T>C  
3124 c. 4924T>A  
3125 c. 4923T>C  
3126 c. 4923T>A  
3127 c. 4922C>G  
3128 c. 4922C>A  
3129 c. 4921G>T  
3130 c. 4921G>C  
3131 c. 4920A>T

|            |              |
|------------|--------------|
| Benign     | not provided |
| Benign     | not provided |
| Benign     | not provided |
| Benign     | not provided |
| Benign     | not provided |
| Benign     | not provided |
| Benign     | not provided |
| Pathogenic | not provided |
| Pathogenic | not provided |
| Benign     | not provided |
| Benign     | not provided |
| Pathogenic | not provided |
| Pathogenic | not provided |
| Benign     | not provided |
| Benign     | not provided |
| Benign     | not provided |
| Pathogenic | not provided |
| Pathogenic | not provided |
| Pathogenic | not provided |
| Benign     | not provided |
| Pathogenic | not provided |
| Benign     | not provided |
| Benign     | not provided |
| Pathogenic | not provided |
| Benign     | not provided |
| Pathogenic | not provided |
| Pathogenic | not provided |
| Benign     | not provided |
| Benign     | not provided |
| Benign     | not provided |
| Benign     | not provided |
| Benign     | not provided |
| Pathogenic | not provided |
| Pathogenic | not provided |
| Benign     | not provided |
| Benign     | not provided |
| Pathogenic | not provided |
| Pathogenic | not provided |
| Benign     | not provided |
| Benign     | not provided |
| Benign     | not provided |
| Benign     | not provided |
| Pathogenic | not provided |
| Benign     | not provided |
| Benign     | not provided |
| Benign     | not provided |
| Benign     | not provided |
| Benign     | not provided |
| Pathogenic | not provided |



|      |            |            |              |
|------|------------|------------|--------------|
| 3132 | c. 4920A>G | Pathogenic | not provided |
| 3133 | c. 4920A>C | Benign     | not provided |
| 3134 | c. 4919C>T | Benign     | not provided |
| 3135 | c. 4919C>G | Benign     | not provided |
| 3136 | c. 4919C>A | Benign     | not provided |
| 3137 | c. 4918A>T | Benign     | not provided |
| 3138 | c. 4918A>C | Benign     | not provided |
| 3139 | c. 4917G>T | Pathogenic | not provided |
| 3140 | c. 4917G>C | Benign     | not provided |
| 3141 | c. 4916T>A | Pathogenic | not provided |
| 3142 | c. 4916T>G | Benign     | not provided |
| 3143 | c. 4915T>G | Benign     | not provided |
| 3144 | c. 4915T>A | Benign     | not provided |
| 3145 | c. 4914A>T | Benign     | not provided |
| 3146 | c. 4914A>C | Benign     | not provided |
| 3147 | c. 4913A>T | Pathogenic | not provided |
| 3148 | c. 4913A>G | Benign     | not provided |
| 3149 | c. 4913A>C | Benign     | not provided |
| 3150 | c. 4912G>T | Pathogenic | not provided |
| 3151 | c. 4912G>C | Benign     | not provided |
| 3152 | c. 4912G>A | Pathogenic | not provided |
| 3153 | c. 4911A>T | Pathogenic | not provided |
| 3154 | c. 4911A>G | Pathogenic | not provided |
| 3155 | c. 4911A>C | Benign     | not provided |
| 3156 | c. 4910C>G | Benign     | not provided |
| 3157 | c. 4909C>G | Benign     | not provided |
| 3158 | c. 4909C>A | Benign     | not provided |
| 3159 | c. 4908G>T | Benign     | not provided |
| 3160 | c. 4908G>C | Benign     | not provided |
| 3161 | c. 4907A>T | Pathogenic | not provided |
| 3162 | c. 4907A>G | Benign     | not provided |
| 3163 | c. 4907A>C | Benign     | not provided |
| 3164 | c. 4906A>T | Pathogenic | not provided |
| 3165 | c. 4906A>G | Benign     | not provided |
| 3166 | c. 4906A>C | Benign     | not provided |
| 3167 | c. 4905G>C | Benign     | not provided |
| 3168 | c. 4905G>A | Pathogenic | not provided |
| 3169 | c. 4905G>T | Pathogenic | not provided |
| 3170 | c. 4904A>T | Pathogenic | not provided |
| 3171 | c. 4904A>G | Pathogenic | not provided |
| 3172 | c. 4904A>C | Benign     | not provided |
| 3173 | c. 4902G>T | Benign     | not provided |
| 3174 | c. 4902G>C | Benign     | not provided |
| 3175 | c. 4901G>C | Benign     | not provided |
| 3176 | c. 4901G>A | Pathogenic | not provided |
| 3177 | c. 4900A>C | Benign     | not provided |
| 3178 | c. 4899C>G | Benign     | not provided |
| 3179 | c. 4898G>T | Benign     | not provided |
| 3180 | c. 4898G>C | Benign     | not provided |
| 3181 | c. 4898G>A | Pathogenic | not provided |
| 3182 | c. 4897A>T | Pathogenic | not provided |
| 3183 | c. 4897A>G | Pathogenic | not provided |
| 3184 | c. 4896G>T | Pathogenic | not provided |
| 3185 | c. 4896G>C | Benign     | not provided |

|      |              |             |            |              |
|------|--------------|-------------|------------|--------------|
| 3186 | c. 4896G>A   |             | Pathogenic | not provided |
| 3187 | c. 4895T>C   |             | Benign     | not provided |
| 3188 | c. 4895T>A   |             | Benign     | not provided |
| 3189 | c. 4893T>G   |             | Benign     | not provided |
| 3190 | c. 4892G>T   |             | Benign     | not provided |
| 3191 | c. 4892G>C   |             | Benign     | not provided |
| 3192 | c. 4891A>G   |             | Benign     | not provided |
| 3193 | c. 4891A>C   |             | Benign     | not provided |
| 3194 | c. 4777A>T   | rs397509197 | Benign     | not provided |
| 3195 | c. 4743A>C   | rs397509194 | Benign     | not provided |
| 3196 | c. 4471C>G   | rs111034213 | Benign     | not provided |
| 3197 | c. 4343G>C   | rs80357354  | Benign     | not provided |
| 3198 | c. 4172T>C   | rs397509146 | Benign     | not provided |
| 3199 | c. 3829G>C   | rs397509112 | Benign     | not provided |
| 3200 | c. 3758C>A   | rs397509100 | Pathogenic | not provided |
| 3201 | c. 3722C>G   | rs80357143  | Benign     | not provided |
| 3202 | c. 3613G>C   | rs80357294  | Benign     | not provided |
| 3203 | c. 3228A>T   | rs397509048 | Pathogenic | not provided |
| 3204 | c. 3152C>G   | rs397509039 | Benign     | not provided |
| 3205 | c. 3140T>C   | rs397509037 | Benign     | not provided |
| 3206 | c. 3074C>T   | rs397509034 | Benign     | not provided |
| 3207 | c. 3072C>G   | rs397509033 | Benign     | not provided |
| 3208 | c. 2879G>A   | rs397509022 | Benign     | not provided |
| 3209 | c. 2675T>C   | rs397508994 | Benign     | not provided |
| 3210 | c. 2600A>G   | rs397508985 | Pathogenic | not provided |
| 3211 | c. 2413T>C   | rs397508966 | Benign     | not provided |
| 3212 | c. 2330A>G   | rs587778116 | Pathogenic | not provided |
| 3213 | c. 1960A>G   | rs80357355  | Benign     | not provided |
| 3214 | c. 1932T>G   | rs397508918 | Benign     | not provided |
| 3215 | c. 1744A>G   | rs397508906 | Benign     | not provided |
| 3216 | c. 1690A>C   | rs397507191 | Benign     | not provided |
| 3217 | c. 1669A>G   | rs397508895 | Benign     | not provided |
| 3218 | c. 1655G>T   | rs397508893 | Benign     | not provided |
| 3219 | c. 1544A>G   | rs397508881 | Pathogenic | not provided |
| 3220 | c. 1393T>G   | rs397508869 | Benign     | not provided |
| 3221 | c. 1262A>G   | rs397508849 | Benign     | not provided |
| 3222 | c. 1076C>T   | rs397508831 | Benign     | not provided |
| 3223 | c. 791G>A    | rs397509322 | Pathogenic | not provided |
| 3224 | c. 790A>T    | rs397509321 | Pathogenic | not provided |
| 3225 | c. 788G>T    | rs397509319 | Benign     | not provided |
| 3226 | c. 788G>C    | rs397509319 | Pathogenic | not provided |
| 3227 | c. 787G>T    | rs397509318 | Benign     | not provided |
| 3228 | c. 668A>G    | rs397509306 | Benign     | not provided |
| 3229 | c. 472A>T    | rs397509192 | Benign     | not provided |
| 3230 | c. 466C>G    | rs587778115 | Benign     | not provided |
| 3231 | c. 346G>A    | rs397509071 | Pathogenic | not provided |
| 3232 | c. 340T>C    | rs397509062 | Benign     | not provided |
| 3233 | c. 329A>C    | rs397509053 | Benign     | not provided |
| 3234 | c. 301+10G>T |             | Pathogenic | not provided |
| 3235 | c. 301+10G>C |             | Benign     | not provided |
| 3236 | c. 301+9T>G  |             | Benign     | not provided |
| 3237 | c. 301+8T>G  |             | Benign     | not provided |
| 3238 | c. 301+8T>A  |             | Benign     | not provided |
| 3239 | c. 301+7G>T  |             | Benign     | not provided |



|      |           |             |            |              |
|------|-----------|-------------|------------|--------------|
| 3294 | c. 278T>C | rs397509006 | Benign     | not provided |
| 3295 | c. 278T>A |             | Pathogenic | not provided |
| 3296 | c. 277T>C |             | Benign     | not provided |
| 3297 | c. 277T>A |             | Benign     | not provided |
| 3298 | c. 277T>G |             | Benign     | not provided |
| 3299 | c. 276T>G |             | Benign     | not provided |
| 3300 | c. 276T>C |             | Benign     | not provided |
| 3301 | c. 276T>A |             | Benign     | not provided |
| 3302 | c. 275C>T |             | Benign     | not provided |
| 3303 | c. 275C>A |             | Benign     | not provided |
| 3304 | c. 274G>T |             | Benign     | not provided |
| 3305 | c. 274G>A |             | Pathogenic | not provided |
| 3306 | c. 273T>C |             | Benign     | not provided |
| 3307 | c. 273T>A |             | Benign     | not provided |
| 3308 | c. 273T>G |             | Benign     | not provided |
| 3309 | c. 272G>T |             | Benign     | not provided |
| 3310 | c. 271T>G |             | Benign     | not provided |
| 3311 | c. 271T>A |             | Benign     | not provided |
| 3312 | c. 270T>G |             | Pathogenic | not provided |
| 3313 | c. 270T>A |             | Pathogenic | not provided |
| 3314 | c. 269T>G |             | Benign     | not provided |
| 3315 | c. 269T>A |             | Benign     | not provided |
| 3316 | c. 268A>T |             | Benign     | not provided |
| 3317 | c. 268A>C |             | Benign     | not provided |
| 3318 | c. 267C>T |             | Benign     | not provided |
| 3319 | c. 267C>A |             | Pathogenic | not provided |
| 3320 | c. 266T>G |             | Benign     | not provided |
| 3321 | c. 266T>A |             | Benign     | not provided |
| 3322 | c. 265A>T |             | Benign     | not provided |
| 3323 | c. 265A>G |             | Benign     | not provided |
| 3324 | c. 265A>C |             | Benign     | not provided |
| 3325 | c. 264A>T |             | Pathogenic | not provided |
| 3326 | c. 264A>G |             | Benign     | not provided |
| 3327 | c. 264A>C |             | Benign     | not provided |
| 3328 | c. 263A>G |             | Benign     | not provided |
| 3329 | c. 263A>C |             | Benign     | not provided |
| 3330 | c. 262A>T |             | Pathogenic | not provided |
| 3331 | c. 262A>G |             | Benign     | not provided |
| 3332 | c. 262A>C |             | Benign     | not provided |
| 3333 | c. 261G>T |             | Pathogenic | not provided |
| 3334 | c. 261G>C |             | Benign     | not provided |
| 3335 | c. 260T>C |             | Benign     | not provided |
| 3336 | c. 259T>A |             | Benign     | not provided |
| 3337 | c. 258A>C |             | Benign     | not provided |
| 3338 | c. 257T>G |             | Benign     | not provided |
| 3339 | c. 257T>C |             | Benign     | not provided |
| 3340 | c. 257T>A |             | Benign     | not provided |
| 3341 | c. 256C>T |             | Benign     | not provided |
| 3342 | c. 256C>G |             | Benign     | not provided |
| 3343 | c. 256C>A |             | Benign     | not provided |
| 3344 | c. 255G>C |             | Benign     | not provided |
| 3345 | c. 254A>T |             | Pathogenic | not provided |
| 3346 | c. 254A>G |             | Pathogenic | not provided |
| 3347 | c. 254A>C |             | Benign     | not provided |

|      |           |            |              |
|------|-----------|------------|--------------|
| 3348 | c. 253G>T | Pathogenic | not provided |
| 3349 | c. 253G>C | Benign     | not provided |
| 3350 | c. 253G>A | Pathogenic | not provided |
| 3351 | c. 252A>T | Pathogenic | not provided |
| 3352 | c. 252A>G | Benign     | not provided |
| 3353 | c. 252A>C | Benign     | not provided |
| 3354 | c. 251A>T | Pathogenic | not provided |
| 3355 | c. 251A>G | Benign     | not provided |
| 3356 | c. 251A>C | Benign     | not provided |
| 3357 | c. 250G>C | Benign     | not provided |
| 3358 | c. 250G>A | Pathogenic | not provided |
| 3359 | c. 249T>G | Benign     | not provided |
| 3360 | c. 249T>A | Pathogenic | not provided |
| 3361 | c. 248T>G | Benign     | not provided |
| 3362 | c. 248T>A | Benign     | not provided |
| 3363 | c. 247G>C | Benign     | not provided |
| 3364 | c. 246T>G | Benign     | not provided |
| 3365 | c. 246T>C | Benign     | not provided |
| 3366 | c. 246T>A | Benign     | not provided |
| 3367 | c. 245T>G | Benign     | not provided |
| 3368 | c. 245T>C | Benign     | not provided |
| 3369 | c. 245T>A | Benign     | not provided |
| 3370 | c. 244C>T | Benign     | not provided |
| 3371 | c. 244C>G | Benign     | not provided |
| 3372 | c. 244C>A | Benign     | not provided |
| 3373 | c. 243A>T | Benign     | not provided |
| 3374 | c. 243A>C | Benign     | not provided |
| 3375 | c. 242A>G | Pathogenic | not provided |
| 3376 | c. 242A>C | Benign     | not provided |
| 3377 | c. 241C>A | Pathogenic | not provided |
| 3378 | c. 240T>G | Benign     | not provided |
| 3379 | c. 240T>C | Benign     | not provided |
| 3380 | c. 240T>A | Benign     | not provided |
| 3381 | c. 239G>T | Benign     | not provided |
| 3382 | c. 239G>C | Benign     | not provided |
| 3383 | c. 239G>A | Pathogenic | not provided |
| 3384 | c. 238A>T | Pathogenic | not provided |
| 3385 | c. 238A>G | Pathogenic | not provided |
| 3386 | c. 238A>C | Benign     | not provided |
| 3387 | c. 237T>G | Benign     | not provided |
| 3388 | c. 237T>C | Benign     | not provided |
| 3389 | c. 237T>A | Benign     | not provided |
| 3390 | c. 236T>G | Pathogenic | not provided |
| 3391 | c. 236T>C | Benign     | not provided |
| 3392 | c. 236T>A | Pathogenic | not provided |
| 3393 | c. 235T>C | Benign     | not provided |
| 3394 | c. 234A>T | Pathogenic | not provided |
| 3395 | c. 234A>G | Benign     | not provided |
| 3396 | c. 234A>C | Benign     | not provided |
| 3397 | c. 233G>T | Pathogenic | not provided |
| 3398 | c. 233G>C | Benign     | not provided |
| 3399 | c. 233G>A | Pathogenic | not provided |
| 3400 | c. 232A>T | Pathogenic | not provided |
| 3401 | c. 232A>G | Pathogenic | not provided |



|      |             |            |              |
|------|-------------|------------|--------------|
| 3402 | c. 232A>C   | Benign     | not provided |
| 3403 | c. 230C>A   | Benign     | not provided |
| 3404 | c. 229A>T   | Benign     | not provided |
| 3405 | c. 229A>G   | Pathogenic | not provided |
| 3406 | c. 229A>C   | Benign     | not provided |
| 3407 | c. 228T>C   | Benign     | not provided |
| 3408 | c. 228T>A   | Benign     | not provided |
| 3409 | c. 227G>T   | Benign     | not provided |
| 3410 | c. 227G>C   | Benign     | not provided |
| 3411 | c. 227G>A   | Benign     | not provided |
| 3412 | c. 226A>T   | Pathogenic | not provided |
| 3413 | c. 226A>G   | Benign     | not provided |
| 3414 | c. 226A>C   | Benign     | not provided |
| 3415 | c. 225A>T   | Pathogenic | not provided |
| 3416 | c. 225A>G   | Benign     | not provided |
| 3417 | c. 225A>C   | Benign     | not provided |
| 3418 | c. 224A>G   | Benign     | not provided |
| 3419 | c. 224A>C   | Benign     | not provided |
| 3420 | c. 223G>T   | Pathogenic | not provided |
| 3421 | c. 223G>C   | Benign     | not provided |
| 3422 | c. 223G>A   | Pathogenic | not provided |
| 3423 | c. 222A>T   | Pathogenic | not provided |
| 3424 | c. 221A>T   | Pathogenic | not provided |
| 3425 | c. 221A>G   | Benign     | not provided |
| 3426 | c. 221A>C   | Benign     | not provided |
| 3427 | c. 220C>G   | Benign     | not provided |
| 3428 | c. 219A>T   | Benign     | not provided |
| 3429 | c. 219A>C   | Benign     | not provided |
| 3430 | c. 218T>G   | Benign     | not provided |
| 3431 | c. 218T>C   | Benign     | not provided |
| 3432 | c. 218T>A   | Benign     | not provided |
| 3433 | c. 217C>G   | Benign     | not provided |
| 3434 | c. 215G>T   | Benign     | not provided |
| 3435 | c. 215G>C   | Benign     | not provided |
| 3436 | c. 215G>A   | Benign     | not provided |
| 3437 | c. 214A>T   | Pathogenic | not provided |
| 3438 | c. 214A>G   | Pathogenic | not provided |
| 3439 | c. 214A>C   | Benign     | not provided |
| 3440 | c. 213G>T   | Pathogenic | not provided |
| 3441 | c. 213G>C   | Benign     | not provided |
| 3442 | c. 213G>A   | Pathogenic | not provided |
| 3443 | c. 213-1G>C | Benign     | not provided |
| 3444 | c. 213-3C>T | Benign     | not provided |
| 3445 | c. 213-3C>A | Pathogenic | not provided |
| 3446 | c. 213-4T>G | Benign     | not provided |
| 3447 | c. 213-4T>C | Benign     | not provided |
| 3448 | c. 213-4T>A | Benign     | not provided |
| 3449 | c. 213-5T>G | Benign     | not provided |
| 3450 | c. 213-5T>C | Benign     | not provided |
| 3451 | c. 213-6T>G | Pathogenic | not provided |
| 3452 | c. 213-6T>C | Benign     | not provided |
| 3453 | c. 213-6T>A | Benign     | not provided |
| 3454 | c. 213-7A>T | Pathogenic | not provided |
| 3455 | c. 213-7A>G | Benign     | not provided |

|      |              |            |            |              |
|------|--------------|------------|------------|--------------|
| 3456 | c. 213-7A>C  | rs80358174 | Benign     | not provided |
| 3457 | c. 213-8A>G  |            | Pathogenic | not provided |
| 3458 | c. 213-8A>T  |            | Pathogenic | not provided |
| 3459 | c. 213-9T>G  |            | Benign     | not provided |
| 3460 | c. 213-9T>C  |            | Benign     | not provided |
| 3461 | c. 213-9T>A  |            | Benign     | not provided |
| 3462 | c. 213-10T>G |            | Benign     | not provided |
| 3463 | c. 213-10T>C |            | Benign     | not provided |
| 3464 | c. 213-10T>A |            | Pathogenic | not provided |
| 3465 | c. 212+10T>A |            | Pathogenic | not provided |
| 3466 | c. 212+10T>C |            | Benign     | not provided |
| 3467 | c. 212+9T>G  |            | Benign     | not provided |
| 3468 | c. 212+9T>C  |            | Benign     | not provided |
| 3469 | c. 212+9T>A  |            | Benign     | not provided |
| 3470 | c. 212+8A>C  |            | Benign     | not provided |
| 3471 | c. 212+8A>T  |            | Pathogenic | not provided |
| 3472 | c. 212+8A>G  |            | Benign     | not provided |
| 3473 | c. 212+7A>T  |            | Pathogenic | not provided |
| 3474 | c. 212+7A>G  |            | Pathogenic | not provided |
| 3475 | c. 212+7A>C  |            | Benign     | not provided |
| 3476 | c. 212+6T>G  |            | Benign     | not provided |
| 3477 | c. 212+6T>C  |            | Benign     | not provided |
| 3478 | c. 212+6T>A  |            | Benign     | not provided |
| 3479 | c. 212+5A>T  |            | Benign     | not provided |
| 3480 | c. 212+5A>G  |            | Pathogenic | not provided |
| 3481 | c. 212+5A>C  |            | Benign     | not provided |
| 3482 | c. 212+3A>C  |            | Benign     | not provided |
| 3483 | c. 212+2T>G  |            | Benign     | not provided |
| 3484 | c. 212+2T>A  |            | Pathogenic | not provided |
| 3485 | c. 211A>T    |            | Pathogenic | not provided |
| 3486 | c. 211A>C    |            | Benign     | not provided |
| 3487 | c. 210A>T    |            | Pathogenic | not provided |
| 3488 | c. 210A>G    |            | Benign     | not provided |
| 3489 | c. 210A>C    |            | Benign     | not provided |
| 3490 | c. 209A>G    |            | Benign     | not provided |
| 3491 | c. 209A>C    |            | Benign     | not provided |
| 3492 | c. 209A>T    |            | Pathogenic | not provided |
| 3493 | c. 208A>T    |            | Pathogenic | not provided |
| 3494 | c. 208A>G    |            | Benign     | not provided |
| 3495 | c. 208A>C    |            | Benign     | not provided |
| 3496 | c. 207C>A    |            | Pathogenic | not provided |
| 3497 | c. 206C>G    |            | Benign     | not provided |
| 3498 | c. 205A>T    |            | Benign     | not provided |
| 3499 | c. 205A>G    |            | Benign     | not provided |
| 3500 | c. 205A>C    |            | Benign     | not provided |
| 3501 | c. 204A>G    |            | Pathogenic | not provided |
| 3502 | c. 204A>C    |            | Benign     | not provided |
| 3503 | c. 203T>C    |            | Benign     | not provided |
| 3504 | c. 202A>T    |            | Benign     | not provided |
| 3505 | c. 202A>C    |            | Benign     | not provided |
| 3506 | c. 201T>A    |            | Benign     | not provided |
| 3507 | c. 200A>G    |            | Benign     | not provided |
| 3508 | c. 200A>C    |            | Benign     | not provided |
| 3509 | c. 199G>C    |            | Benign     | not provided |

|      |           |            |              |
|------|-----------|------------|--------------|
| 3510 | c. 198T>G | Benign     | not provided |
| 3511 | c. 197A>T | Pathogenic | not provided |
| 3512 | c. 197A>G | Benign     | not provided |
| 3513 | c. 197A>C | Benign     | not provided |
| 3514 | c. 196A>C | Benign     | not provided |
| 3515 | c. 196A>T | Pathogenic | not provided |
| 3516 | c. 196A>G | Benign     | not provided |
| 3517 | c. 195G>T | Pathogenic | not provided |
| 3518 | c. 195G>C | Benign     | not provided |
| 3519 | c. 195G>A | Pathogenic | not provided |
| 3520 | c. 194A>T | Pathogenic | not provided |
| 3521 | c. 194A>G | Benign     | not provided |
| 3522 | c. 194A>C | Benign     | not provided |
| 3523 | c. 193A>T | Pathogenic | not provided |
| 3524 | c. 193A>C | Benign     | not provided |
| 3525 | c. 192T>C | Benign     | not provided |
| 3526 | c. 191G>T | Benign     | not provided |
| 3527 | c. 190T>A | Benign     | not provided |
| 3528 | c. 189A>G | Pathogenic | not provided |
| 3529 | c. 189A>C | Benign     | not provided |
| 3530 | c. 188T>G | Benign     | not provided |
| 3531 | c. 188T>C | Benign     | not provided |
| 3532 | c. 187T>G | Benign     | not provided |
| 3533 | c. 187T>C | Benign     | not provided |
| 3534 | c. 187T>A | Benign     | not provided |
| 3535 | c. 186T>G | Benign     | not provided |
| 3536 | c. 186T>C | Benign     | not provided |
| 3537 | c. 186T>A | Benign     | not provided |
| 3538 | c. 185C>A | Benign     | not provided |
| 3539 | c. 185C>T | Benign     | not provided |
| 3540 | c. 184C>T | Benign     | not provided |
| 3541 | c. 184C>G | Pathogenic | not provided |
| 3542 | c. 184C>A | Benign     | not provided |
| 3543 | c. 183T>G | Benign     | not provided |
| 3544 | c. 183T>A | Benign     | not provided |
| 3545 | c. 182G>T | Benign     | not provided |
| 3546 | c. 182G>C | Benign     | not provided |
| 3547 | c. 180G>T | Benign     | not provided |
| 3548 | c. 180G>C | Benign     | not provided |
| 3549 | c. 180G>A | Pathogenic | not provided |
| 3550 | c. 179A>T | Pathogenic | not provided |
| 3551 | c. 179A>C | Benign     | not provided |
| 3552 | c. 178C>G | Benign     | not provided |
| 3553 | c. 178C>A | Pathogenic | not provided |
| 3554 | c. 177A>T | Benign     | not provided |
| 3555 | c. 177A>G | Pathogenic | not provided |
| 3556 | c. 177A>C | Benign     | not provided |
| 3557 | c. 176C>G | Benign     | not provided |
| 3558 | c. 175T>G | Benign     | not provided |
| 3559 | c. 175T>C | Benign     | not provided |
| 3560 | c. 175T>A | Benign     | not provided |
| 3561 | c. 174T>G | Benign     | not provided |
| 3562 | c. 174T>C | Benign     | not provided |
| 3563 | c. 174T>A | Benign     | not provided |

|      |           |             |            |              |
|------|-----------|-------------|------------|--------------|
| 3564 | c. 173C>T | rs397508898 | Benign     | not provided |
| 3565 | c. 173C>G |             | Benign     | not provided |
| 3566 | c. 173C>A | rs397508897 | Benign     | not provided |
| 3567 | c. 170G>T |             | Benign     | not provided |
| 3568 | c. 168A>G | rs397508898 | Benign     | not provided |
| 3569 | c. 168A>C |             | Benign     | not provided |
| 3570 | c. 168A>T | rs397508897 | Pathogenic | not provided |
| 3571 | c. 167A>T |             | Pathogenic | not provided |
| 3572 | c. 167A>C | rs397508897 | Benign     | not provided |
| 3573 | c. 167A>G |             | Benign     | not provided |
| 3574 | c. 166A>T | rs397508897 | Pathogenic | not provided |
| 3575 | c. 166A>G |             | Benign     | not provided |
| 3576 | c. 166A>C | rs397508897 | Benign     | not provided |
| 3577 | c. 165G>T |             | Pathogenic | not provided |
| 3578 | c. 165G>C | rs397508897 | Benign     | not provided |
| 3579 | c. 164A>T |             | Pathogenic | not provided |
| 3580 | c. 164A>C | rs397508897 | Benign     | not provided |
| 3581 | c. 164A>G |             | Benign     | not provided |
| 3582 | c. 163A>T | rs397508897 | Pathogenic | not provided |
| 3583 | c. 163A>G |             | Benign     | not provided |
| 3584 | c. 163A>C | rs397508897 | Benign     | not provided |
| 3585 | c. 162G>T |             | Pathogenic | not provided |
| 3586 | c. 162G>C | rs397508897 | Benign     | not provided |
| 3587 | c. 162G>A |             | Pathogenic | not provided |
| 3588 | c. 161A>T | rs397508897 | Pathogenic | not provided |
| 3589 | c. 161A>C |             | Benign     | not provided |
| 3590 | c. 160C>G | rs397508897 | Benign     | not provided |
| 3591 | c. 159C>G |             | Benign     | not provided |
| 3592 | c. 159C>A | rs397508897 | Pathogenic | not provided |
| 3593 | c. 158A>T |             | Benign     | not provided |
| 3594 | c. 158A>G | rs397508897 | Benign     | not provided |
| 3595 | c. 158A>C |             | Benign     | not provided |
| 3596 | c. 157A>T | rs397508897 | Pathogenic | not provided |
| 3597 | c. 157A>G |             | Pathogenic | not provided |
| 3598 | c. 157A>C | rs397508897 | Benign     | not provided |
| 3599 | c. 156C>T |             | Benign     | not provided |
| 3600 | c. 156C>G | rs397508897 | Pathogenic | not provided |
| 3601 | c. 156C>A |             | Pathogenic | not provided |
| 3602 | c. 155T>G | rs397508897 | Benign     | not provided |
| 3603 | c. 155T>A |             | Benign     | not provided |
| 3604 | c. 154C>G | rs397508897 | Benign     | not provided |
| 3605 | c. 153T>C |             | Benign     | not provided |
| 3606 | c. 153T>A | rs397508897 | Benign     | not provided |
| 3607 | c. 152T>G |             | Benign     | not provided |
| 3608 | c. 152T>A | rs397508897 | Benign     | not provided |
| 3609 | c. 151C>A |             | Benign     | not provided |
| 3610 | c. 151C>T | rs397508897 | Benign     | not provided |
| 3611 | c. 151C>G |             | Benign     | not provided |
| 3612 | c. 150A>C | rs397508897 | Benign     | not provided |
| 3613 | c. 149A>T |             | Pathogenic | not provided |
| 3614 | c. 149A>G | rs397508897 | Benign     | not provided |
| 3615 | c. 149A>C |             | Benign     | not provided |
| 3616 | c. 148A>T | rs397508897 | Pathogenic | not provided |
| 3617 | c. 148A>G |             | Benign     | not provided |

|      |              |            |              |
|------|--------------|------------|--------------|
| 3618 | c. 148A>C    | Benign     | not provided |
| 3619 | c. 147G>T    | Pathogenic | not provided |
| 3620 | c. 147G>C    | Benign     | not provided |
| 3621 | c. 146T>C    | Benign     | not provided |
| 3622 | c. 146T>A    | Benign     | not provided |
| 3623 | c. 145C>T    | Benign     | not provided |
| 3624 | c. 145C>G    | Benign     | not provided |
| 3625 | c. 145C>A    | Benign     | not provided |
| 3626 | c. 144G>T    | Benign     | not provided |
| 3627 | c. 144G>C    | Benign     | not provided |
| 3628 | c. 143T>G    | Benign     | not provided |
| 3629 | c. 143T>C    | Benign     | not provided |
| 3630 | c. 143T>A    | Benign     | not provided |
| 3631 | c. 142A>T    | Benign     | not provided |
| 3632 | c. 142A>C    | Benign     | not provided |
| 3633 | c. 141C>G    | Benign     | not provided |
| 3634 | c. 140G>C    | Benign     | not provided |
| 3635 | c. 138T>G    | Benign     | not provided |
| 3636 | c. 138T>C    | Benign     | not provided |
| 3637 | c. 138T>A    | Benign     | not provided |
| 3638 | c. 137T>G    | Benign     | not provided |
| 3639 | c. 137T>C    | Benign     | not provided |
| 3640 | c. 137T>A    | Pathogenic | not provided |
| 3641 | c. 136T>G    | Benign     | not provided |
| 3642 | c. 136T>C    | Benign     | not provided |
| 3643 | c. 136T>A    | Benign     | not provided |
| 3644 | c. 135A>G    | Benign     | not provided |
| 3645 | c. 135A>C    | Benign     | not provided |
| 3646 | c. 135-2A>T  | Pathogenic | not provided |
| 3647 | c. 135-2A>C  | Benign     | not provided |
| 3648 | c. 135-3T>G  | Benign     | not provided |
| 3649 | c. 135-3T>A  | Benign     | not provided |
| 3650 | c. 135-4A>T  | Benign     | not provided |
| 3651 | c. 135-4A>C  | Benign     | not provided |
| 3652 | c. 135-5T>G  | Benign     | not provided |
| 3653 | c. 135-5T>A  | Benign     | not provided |
| 3654 | c. 135-6T>C  | Benign     | not provided |
| 3655 | c. 135-6T>A  | Pathogenic | not provided |
| 3656 | c. 135-7T>G  | Pathogenic | not provided |
| 3657 | c. 135-7T>A  | Benign     | not provided |
| 3658 | c. 135-8A>T  | Pathogenic | not provided |
| 3659 | c. 135-8A>G  | Benign     | not provided |
| 3660 | c. 135-8A>C  | Benign     | not provided |
| 3661 | c. 135-9A>T  | Pathogenic | not provided |
| 3662 | c. 135-9A>G  | Pathogenic | not provided |
| 3663 | c. 135-9A>C  | Benign     | not provided |
| 3664 | c. 135-10T>G | Benign     | not provided |
| 3665 | c. 135-10T>C | Benign     | not provided |
| 3666 | c. 135-10T>A | Benign     | not provided |
| 3667 | c. 135-11A>T | Benign     | not provided |
| 3668 | c. 135-11A>C | Benign     | not provided |
| 3669 | c. 135-12T>G | Benign     | not provided |
| 3670 | c. 135-12T>C | Benign     | not provided |
| 3671 | c. 135-12T>A | Benign     | not provided |



|      |              |            |              |
|------|--------------|------------|--------------|
| 3672 | c. 134+23G>T | Benign     | not provided |
| 3673 | c. 134+23G>A | Benign     | not provided |
| 3674 | c. 134+22G>T | Benign     | not provided |
| 3675 | c. 134+22G>C | Benign     | not provided |
| 3676 | c. 134+22G>A | Pathogenic | not provided |
| 3677 | c. 134+21T>G | Benign     | not provided |
| 3678 | c. 134+21T>C | Benign     | not provided |
| 3679 | c. 134+21T>A | Benign     | not provided |
| 3680 | c. 134+20G>T | Benign     | not provided |
| 3681 | c. 134+20G>C | Benign     | not provided |
| 3682 | c. 134+20G>A | Pathogenic | not provided |
| 3683 | c. 134+19T>G | Benign     | not provided |
| 3684 | c. 134+19T>A | Benign     | not provided |
| 3685 | c. 134+18A>C | Benign     | not provided |
| 3686 | c. 134+17T>G | Benign     | not provided |
| 3687 | c. 134+17T>C | Benign     | not provided |
| 3688 | c. 134+17T>A | Benign     | not provided |
| 3689 | c. 134+16T>G | Benign     | not provided |
| 3690 | c. 134+16T>C | Benign     | not provided |
| 3691 | c. 134+16T>A | Benign     | not provided |
| 3692 | c. 134+15G>T | Benign     | not provided |
| 3693 | c. 134+15G>C | Benign     | not provided |
| 3694 | c. 134+14T>G | Benign     | not provided |
| 3695 | c. 134+14T>C | Benign     | not provided |
| 3696 | c. 134+14T>A | Benign     | not provided |
| 3697 | c. 134+13G>T | Benign     | not provided |
| 3698 | c. 134+13G>C | Benign     | not provided |
| 3699 | c. 134+12T>G | Benign     | not provided |
| 3700 | c. 134+12T>C | Benign     | not provided |
| 3701 | c. 134+12T>A | Benign     | not provided |
| 3702 | c. 134+11A>T | Benign     | not provided |
| 3703 | c. 134+11A>G | Benign     | not provided |
| 3704 | c. 134+11A>C | Benign     | not provided |
| 3705 | c. 134+10A>T | Pathogenic | not provided |
| 3706 | c. 134+10A>G | Benign     | not provided |
| 3707 | c. 134+10A>C | Benign     | not provided |
| 3708 | c. 134+9G>T  | Pathogenic | not provided |
| 3709 | c. 134+8T>G  | Benign     | not provided |
| 3710 | c. 134+8T>C  | Benign     | not provided |
| 3711 | c. 134+8T>A  | Benign     | not provided |
| 3712 | c. 134+7T>G  | Benign     | not provided |
| 3713 | c. 134+7T>C  | Benign     | not provided |
| 3714 | c. 134+7T>A  | Benign     | not provided |
| 3715 | c. 134+6T>G  | Benign     | not provided |
| 3716 | c. 134+6T>C  | Benign     | not provided |
| 3717 | c. 134+6T>A  | Benign     | not provided |
| 3718 | c. 134+4A>T  | Pathogenic | not provided |
| 3719 | c. 134+4A>G  | Benign     | not provided |
| 3720 | c. 134+2T>A  | Benign     | not provided |
| 3721 | c. 134A>T    | Pathogenic | not provided |
| 3722 | c. 134A>G    | Benign     | not provided |
| 3723 | c. 133A>T    | Pathogenic | not provided |
| 3724 | c. 133A>G    | Benign     | not provided |
| 3725 | c. 132C>A    | Pathogenic | not provided |

|      |           |            |            |              |
|------|-----------|------------|------------|--------------|
| 3726 | c. 131G>C | rs80357327 | Benign     | not provided |
| 3727 | c. 130T>G |            | Benign     | not provided |
| 3728 | c. 130T>C | rs80357327 | Benign     | not provided |
| 3729 | c. 129T>G |            | Benign     | not provided |
| 3730 | c. 129T>C |            | Benign     | not provided |
| 3731 | c. 129T>A |            | Benign     | not provided |
| 3732 | c. 128T>G |            | Benign     | not provided |
| 3733 | c. 128T>A |            | Benign     | not provided |
| 3734 | c. 127T>G |            | Benign     | not provided |
| 3735 | c. 127T>A |            | Benign     | not provided |
| 3736 | c. 126A>T |            | Benign     | not provided |
| 3737 | c. 126A>G |            | Pathogenic | not provided |
| 3738 | c. 126A>C |            | Benign     | not provided |
| 3739 | c. 125T>G |            | Benign     | not provided |
| 3740 | c. 125T>C |            | Benign     | not provided |
| 3741 | c. 125T>A |            | Benign     | not provided |
| 3742 | c. 124A>T |            | Benign     | not provided |
| 3743 | c. 123C>G |            | Pathogenic | not provided |
| 3744 | c. 123C>A |            | Benign     | not provided |
| 3745 | c. 122A>C |            | Benign     | not provided |
| 3746 | c. 121C>G |            | Benign     | not provided |
| 3747 | c. 120C>G |            | Benign     | not provided |
| 3748 | c. 120C>A |            | Benign     | not provided |
| 3749 | c. 119A>T |            | Benign     | not provided |
| 3750 | c. 119A>G |            | Benign     | not provided |
| 3751 | c. 119A>C |            | Benign     | not provided |
| 3752 | c. 118G>T |            | Pathogenic | not provided |
| 3753 | c. 118G>C |            | Benign     | not provided |
| 3754 | c. 117T>C |            | Benign     | not provided |
| 3755 | c. 116G>C |            | Pathogenic | not provided |
| 3756 | c. 114G>C |            | Benign     | not provided |
| 3757 | c. 113A>T |            | Pathogenic | not provided |
| 3758 | c. 113A>G |            | Benign     | not provided |
| 3759 | c. 113A>C |            | Benign     | not provided |
| 3760 | c. 112A>T |            | Pathogenic | not provided |
| 3761 | c. 112A>G |            | Benign     | not provided |
| 3762 | c. 112A>C |            | Benign     | not provided |
| 3763 | c. 111A>T |            | Pathogenic | not provided |
| 3764 | c. 110C>T |            | Benign     | not provided |
| 3765 | c. 109A>T |            | Benign     | not provided |
| 3766 | c. 109A>G |            | Benign     | not provided |
| 3767 | c. 109A>C |            | Benign     | not provided |
| 3768 | c. 106T>G |            | Benign     | not provided |
| 3769 | c. 105C>T |            | Benign     | not provided |
| 3770 | c. 105C>G |            | Benign     | not provided |
| 3771 | c. 105C>A |            | Benign     | not provided |
| 3772 | c. 104T>G |            | Benign     | not provided |
| 3773 | c. 104T>C |            | Benign     | not provided |
| 3774 | c. 104T>A |            | Benign     | not provided |
| 3775 | c. 103G>C |            | Benign     | not provided |
| 3776 | c. 103G>A |            | Pathogenic | not provided |
| 3777 | c. 102T>C |            | Benign     | not provided |
| 3778 | c. 102T>A |            | Benign     | not provided |
| 3779 | c. 101C>G |            | Benign     | not provided |

3780 c. 101C>A  
3781 c. 100C>G  
3782 c. 100C>A  
3783 c. 99A>T  
3784 c. 99A>G  
3785 c. 99A>C  
3786 c. 98A>T  
3787 c. 98A>G  
3788 c. 97G>A  
3789 c. 96G>T  
3790 c. 96G>A  
3791 c. 95A>T  
3792 c. 95A>G  
3793 c. 95A>C  
3794 c. 94A>T  
3795 c. 94A>G  
3796 c. 94A>C  
3797 c. 93C>T  
3798 c. 93C>A  
3799 c. 92T>G  
3800 c. 92T>C  
3801 c. 92T>A  
3802 c. 91A>T  
3803 c. 91A>C  
3804 c. 90G>T  
3805 c. 90G>C  
3806 c. 90G>A  
3807 c. 89T>G  
3808 c. 89T>C  
3809 c. 88T>G  
3810 c. 88T>C  
3811 c. 88T>A  
3812 c. 87G>C  
3813 c. 87G>T  
3814 c. 86A>T  
3815 c. 86A>C  
3816 c. 85G>C  
3817 c. 85G>A  
3818 c. 84G>T  
3819 c. 84G>C  
3820 c. 83T>G  
3821 c. 83T>A  
3822 c. 82C>A  
3823 c. 81T>G  
3824 c. 81T>A  
3825 c. 81-1G>T  
3826 c. 81-2A>T  
3827 c. 81-3T>G  
3828 c. 81-3T>C  
3829 c. 81-3T>A  
3830 c. 81-4C>G  
3831 c. 81-4C>A  
3832 c. 81-5G>T  
3833 c. 81-5G>C

[illegible]

|      |             |            |              |
|------|-------------|------------|--------------|
| 3834 | c. 81-6T>G  | Benign     | not provided |
| 3835 | c. 81-7C>T  | Benign     | not provided |
| 3836 | c. 81-7C>G  | Benign     | not provided |
| 3837 | c. 81-7C>A  | Benign     | not provided |
| 3838 | c. 81-8C>T  | Benign     | not provided |
| 3839 | c. 81-8C>G  | Benign     | not provided |
| 3840 | c. 81-8C>A  | Benign     | not provided |
| 3841 | c. 81-9C>T  | Benign     | not provided |
| 3842 | c. 81-10A>T | Benign     | not provided |
| 3843 | c. 81-10A>G | Pathogenic | not provided |
| 3844 | c. 81-10A>C | Benign     | not provided |
| 3845 | c. 81-11T>G | Benign     | not provided |
| 3846 | c. 81-11T>A | Benign     | not provided |
| 3847 | c. 81-12C>A | Benign     | not provided |
| 3848 | c. 81-15C>T | Benign     | not provided |
| 3849 | c. 81-15C>G | Benign     | not provided |
| 3850 | c. 81-16C>G | Benign     | not provided |
| 3851 | c. 81-17C>T | Benign     | not provided |
| 3852 | c. 81-18C>T | Benign     | not provided |
| 3853 | c. 81-19T>G | Benign     | not provided |
| 3854 | c. 81-19T>A | Benign     | not provided |
| 3855 | c. 81-20C>G | Benign     | not provided |
| 3856 | c. 81-20C>A | Benign     | not provided |
| 3857 | c. 81-21T>G | Benign     | not provided |
| 3858 | c. 81-21T>C | Benign     | not provided |
| 3859 | c. 81-21T>A | Benign     | not provided |
| 3860 | c. 81-22T>G | Benign     | not provided |
| 3861 | c. 81-22T>C | Benign     | not provided |
| 3862 | c. 81-22T>A | Benign     | not provided |
| 3863 | c. 81-23T>G | Benign     | not provided |
| 3864 | c. 81-23T>C | Benign     | not provided |
| 3865 | c. 81-23T>A | Benign     | not provided |
| 3866 | c. 80+4A>G  | Benign     | not provided |
| 3867 | c. 80+4A>C  | Benign     | not provided |
| 3868 | c. 80+3A>T  | Benign     | not provided |
| 3869 | c. 80+3A>G  | Pathogenic | not provided |
| 3870 | c. 80+3A>C  | Benign     | not provided |
| 3871 | c. 80+2T>C  | Benign     | not provided |
| 3872 | c. 79T>G    | Benign     | not provided |
| 3873 | c. 79T>C    | Benign     | not provided |
| 3874 | c. 79T>A    | Benign     | not provided |
| 3875 | c. 78C>G    | Pathogenic | not provided |
| 3876 | c. 78C>A    | Benign     | not provided |
| 3877 | c. 77T>G    | Benign     | not provided |
| 3878 | c. 76A>G    | Benign     | not provided |
| 3879 | c. 76A>C    | Benign     | not provided |
| 3880 | c. 74C>G    | Benign     | not provided |
| 3881 | c. 73C>T    | Benign     | not provided |
| 3882 | c. 73C>G    | Benign     | not provided |
| 3883 | c. 73C>A    | Benign     | not provided |
| 3884 | c. 72T>C    | Benign     | not provided |
| 3885 | c. 72T>A    | Benign     | not provided |
| 3886 | c. 71G>T    | Benign     | not provided |
| 3887 | c. 71G>C    | Benign     | not provided |



|      |          |            |              |
|------|----------|------------|--------------|
| 3942 | c. 43A>T | Benign     | not provided |
| 3943 | c. 43A>G | Pathogenic | not provided |
| 3944 | c. 42C>G | Benign     | not provided |
| 3945 | c. 41T>G | Benign     | not provided |
| 3946 | c. 41T>C | Benign     | not provided |
| 3947 | c. 41T>A | Benign     | not provided |
| 3948 | c. 40G>C | Benign     | not provided |
| 3949 | c. 40G>A | Pathogenic | not provided |
| 3950 | c. 39T>G | Benign     | not provided |
| 3951 | c. 39T>C | Benign     | not provided |
| 3952 | c. 39T>A | Benign     | not provided |
| 3953 | c. 38A>T | Benign     | not provided |
| 3954 | c. 38A>G | Benign     | not provided |
| 3955 | c. 38A>C | Benign     | not provided |
| 3956 | c. 37A>T | Pathogenic | not provided |
| 3957 | c. 37A>C | Benign     | not provided |
| 3958 | c. 36A>T | Pathogenic | not provided |
| 3959 | c. 36A>C | Benign     | not provided |
| 3960 | c. 35A>T | Pathogenic | not provided |
| 3961 | c. 35A>C | Benign     | not provided |
| 3962 | c. 34C>A | Benign     | not provided |
| 3963 | c. 33A>T | Benign     | not provided |
| 3964 | c. 33A>C | Benign     | not provided |
| 3965 | c. 32T>A | Benign     | not provided |
| 3966 | c. 31G>T | Benign     | not provided |
| 3967 | c. 31G>A | Benign     | not provided |
| 3968 | c. 30A>C | Benign     | not provided |
| 3969 | c. 30A>T | Pathogenic | not provided |
| 3970 | c. 30A>G | Benign     | not provided |
| 3971 | c. 29A>T | Pathogenic | not provided |
| 3972 | c. 29A>G | Benign     | not provided |
| 3973 | c. 29A>C | Benign     | not provided |
| 3974 | c. 28G>T | Pathogenic | not provided |
| 3975 | c. 28G>C | Benign     | not provided |
| 3976 | c. 28G>A | Benign     | not provided |
| 3977 | c. 27A>T | Pathogenic | not provided |
| 3978 | c. 27A>G | Benign     | not provided |
| 3979 | c. 27A>C | Benign     | not provided |
| 3980 | c. 26A>T | Pathogenic | not provided |
| 3981 | c. 26A>G | Benign     | not provided |
| 3982 | c. 26A>C | Benign     | not provided |
| 3983 | c. 25G>T | Pathogenic | not provided |
| 3984 | c. 25G>A | Pathogenic | not provided |
| 3985 | c. 24T>G | Benign     | not provided |
| 3986 | c. 24T>C | Benign     | not provided |
| 3987 | c. 24T>A | Benign     | not provided |
| 3988 | c. 23T>G | Benign     | not provided |
| 3989 | c. 23T>C | Benign     | not provided |
| 3990 | c. 23T>A | Benign     | not provided |
| 3991 | c. 22G>T | Benign     | not provided |
| 3992 | c. 22G>C | Benign     | not provided |
| 3993 | c. 21C>G | Benign     | not provided |
| 3994 | c. 21C>A | Benign     | not provided |
| 3995 | c. 20G>C | Benign     | not provided |



3996 c. 19C>G  
3997 c. 18T>G  
3998 c. 18T>C  
3999 c. 18T>A  
4000 c. 17T>G  
4001 c. 17T>C  
4002 c. 17T>A  
4003 c. 16C>G  
4004 c. 16C>A  
4005 c. 15T>G  
4006 c. 15T>A  
4007 c. 14C>G  
4008 c. 14C>A  
4009 c. 13G>T  
4010 c. 13G>A  
4011 c. 12T>G  
4012 c. 12T>C  
4013 c. 12T>A  
4014 c. 11C>G  
4015 c. 11C>A  
4016 c. 10T>G  
4017 c. 10T>A  
4018 c. 9A>C  
4019 c. 8T>C  
4020 c. 8T>A  
4021 c. 7T>G  
4022 c. 7T>C  
4023 c. 7T>A  
4024 c. 6T>G  
4025 c. 6T>A  
4026 c. 5A>T  
4027 c. 5A>G  
4028 c. 5A>C  
4029 c. 4G>T  
4030 c. 4G>C  
4031 c. 4G>A  
4032 c. 1A>T  
4033 c. 1A>C  
4034 c. -1A>T  
4035 c. -2A>G  
4036 c. -2A>C  
4037 c. -3G>A  
4038 c. -4A>T  
4039 c. -4A>G  
4040 c. -4A>C  
4041 c. -5A>T  
4042 c. -5A>G  
4043 c. -5A>C  
4044 c. -6A>T  
4045 c. -6A>G  
4046 c. -6A>C  
4047 c. -7G>T  
4048 c. -7G>C  
4049 c. -7G>A

|            |     |          |
|------------|-----|----------|
| Benign     | not | provided |
| Benign     | not | provided |
| Benign     | not | provided |
| Benign     | not | provided |
| Benign     | not | provided |
| Benign     | not | provided |
| Benign     | not | provided |
| Benign     | not | provided |
| Benign     | not | provided |
| Benign     | not | provided |
| Benign     | not | provided |
| Benign     | not | provided |
| Benign     | not | provided |
| Benign     | not | provided |
| Benign     | not | provided |
| Benign     | not | provided |
| Benign     | not | provided |
| Benign     | not | provided |
| Benign     | not | provided |
| Pathogenic | not | provided |
| Benign     | not | provided |
| Benign     | not | provided |
| Benign     | not | provided |
| Benign     | not | provided |
| Benign     | not | provided |
| Benign     | not | provided |
| Benign     | not | provided |
| Benign     | not | provided |
| Benign     | not | provided |
| Benign     | not | provided |
| Benign     | not | provided |
| Benign     | not | provided |
| Benign     | not | provided |
| Benign     | not | provided |
| Benign     | not | provided |
| Pathogenic | not | provided |
| Benign     | not | provided |
| Benign     | not | provided |
| Benign     | not | provided |
| Benign     | not | provided |
| Pathogenic | not | provided |
| Benign     | not | provided |
| Benign     | not | provided |
| Benign     | not | provided |
| Pathogenic | not | provided |
| Benign     | not | provided |
| Benign     | not | provided |
| Pathogenic | not | provided |
| Benign     | not | provided |
| Benign     | not | provided |
| Pathogenic | not | provided |
| Benign     | not | provided |
| Benign     | not | provided |

|      |             |              |            |                        |
|------|-------------|--------------|------------|------------------------|
| 4050 | c. -8A>T    |              | Pathogenic | not provided           |
| 4051 | c. -8A>G    |              | Pathogenic | not provided           |
| 4052 | c. -8A>C    |              | Benign     | not provided           |
| 4053 | c. -9C>T    |              | Benign     | not provided           |
| 4054 | c. -9C>A    |              | Benign     | not provided           |
| 4055 | c. -10A>T   |              | Benign     | not provided           |
| 4056 | c. -10A>G   |              | Benign     | not provided           |
| 4057 | c. -11A>T   |              | Pathogenic | not provided           |
| 4058 | c. -11A>G   |              | Benign     | not provided           |
| 4059 | c. -12G>T   |              | Pathogenic | not provided           |
| 4060 | c. -12G>C   |              | Benign     | not provided           |
| 4061 | c. -12G>A   |              | Benign     | not provided           |
| 4062 | c. -13G>T   |              | Benign     | not provided           |
| 4063 | c. -13G>C   |              | Benign     | not provided           |
| 4064 | c. -14T>A   |              | Benign     | not provided           |
| 4065 | c. -14T>G   |              | Benign     | not provided           |
| 4066 | c. -15T>G   |              | Benign     | not provided           |
| 4067 | c. -15T>A   |              | Benign     | not provided           |
| 4068 | c. -16A>T   |              | Benign     | not provided           |
| 4069 | c. -16A>C   |              | Benign     | not provided           |
| 4070 | c. -17C>G   |              | Benign     | not provided           |
| 4071 | c. -17C>A   |              | Benign     | not provided           |
| 4072 | c. -18T>G   |              | Benign     | not provided           |
| 4073 | c. -18T>C   |              | Benign     | not provided           |
| 4074 | c. -18T>A   |              | Benign     | not provided           |
| 4075 | c. -19T>G   |              | Benign     | not provided           |
| 4076 | c. -19T>C   |              | Benign     | not provided           |
| 4077 | c. -19T>A   |              | Benign     | not provided           |
| 4078 | c. -19-1G>T |              | Benign     | not provided           |
| 4079 | c. -19-1G>C |              | Benign     | not provided           |
| 4080 | c. -19-2A>T |              | Pathogenic | not provided           |
| 4081 | c. -19-2A>C |              | Benign     | not provided           |
| 4082 | c. -19-3A>T |              | Pathogenic | not provided           |
| 4083 | c. -19-3A>C |              | Benign     | not provided           |
| 4084 | c. *1363A>T | rs1332532415 | Benign     | Uncertain significance |
| 4085 | c. *1323A>G | rs189382442  | Benign     | Uncertain significance |
| 4086 | c. *1292T>C | rs182218567  | Benign     | Uncertain significance |
| 4087 | c. *1285C>A | rs757676381  | Pathogenic | Uncertain significance |
| 4088 | c. *1271T>C | rs1555574034 | Benign     | Uncertain significance |
| 4089 | c. *800T>C  | rs1555574136 | Benign     | Uncertain significance |
| 4090 | c. *743G>T  | rs886052971  | Benign     | Uncertain significance |
| 4091 | c. *693C>T  | rs540031582  | Benign     | Uncertain significance |
| 4092 | c. *485G>A  | rs527725740  | Pathogenic | Uncertain significance |
| 4093 | c. *465G>A  | rs886052972  | Benign     | Uncertain significance |
| 4094 | c. *387T>G  | rs886052973  | Benign     | Uncertain significance |
| 4095 | c. *291C>T  | rs878854928  | Benign     | Uncertain significance |
| 4096 | c. *58C>T   | rs137892861  | Benign     | Uncertain significance |
| 4097 | c. *42T>A   | rs273902777  | Benign     | Uncertain significance |
| 4098 | c. *14C>G   | rs1064796142 | Benign     | Uncertain significance |
| 4099 | c. *13A>G   | rs762552027  | Benign     | Uncertain significance |
| 4100 | c. 5588A>G  | rs1567756242 | Pathogenic | Uncertain significance |
| 4101 | c. 5587T>G  | rs763740623  | Benign     | Uncertain significance |
| 4102 | c. 5585A>G  | rs80357183   | Benign     | Uncertain significance |
| 4103 | c. 5585A>T  | rs80357183   | Benign     | Uncertain significance |

|      |              |              |            |                        |
|------|--------------|--------------|------------|------------------------|
| 4104 | c. 5580C>G   |              | Benign     | Uncertain significance |
| 4105 | c. 5575C>T   | rs1555574342 | Benign     | Uncertain significance |
| 4106 | c. 5575C>A   | rs1555574342 | Pathogenic | Uncertain significance |
| 4107 | c. 5574C>G   | rs876659941  | Pathogenic | Uncertain significance |
| 4108 | c. 5573T>A   |              | Benign     | Uncertain significance |
| 4109 | c. 5572A>T   | rs765656957  | Benign     | Uncertain significance |
| 4110 | c. 5571G>T   | rs28897699   | Pathogenic | Uncertain significance |
| 4111 | c. 5571G>C   | rs28897699   | Benign     | Uncertain significance |
| 4112 | c. 5566C>A   | rs80357274   | Pathogenic | Uncertain significance |
| 4113 | c. 5564T>C   | rs900082291  | Benign     | Uncertain significance |
| 4114 | c. 5561T>C   | rs80356996   | Benign     | Uncertain significance |
| 4115 | c. 5555C>T   | rs730881502  | Benign     | Uncertain significance |
| 4116 | c. 5554A>G   | rs1555574370 | Benign     | Uncertain significance |
| 4117 | c. 5553C>A   | rs80357326   | Benign     | Uncertain significance |
| 4118 | c. 5551G>A   |              | Pathogenic | Uncertain significance |
| 4119 | c. 5540G>T   | rs1182000313 | Benign     | Uncertain significance |
| 4120 | c. 5538G>C   | rs80356849   | Benign     | Uncertain significance |
| 4121 | c. 5536C>A   |              | Pathogenic | Uncertain significance |
| 4122 | c. 5534A>G   | rs876660280  | Pathogenic | Uncertain significance |
| 4123 | c. 5531T>C   | rs80357323   | Benign     | Uncertain significance |
| 4124 | c. 5530C>A   | rs1471435242 | Benign     | Uncertain significance |
| 4125 | c. 5528C>T   | rs730881447  | Benign     | Uncertain significance |
| 4126 | c. 5528C>A   | rs730881447  | Benign     | Uncertain significance |
| 4127 | c. 5525T>A   | rs1555574400 | Benign     | Uncertain significance |
| 4128 | c. 5522G>C   | rs80357368   | Benign     | Uncertain significance |
| 4129 | c. 5522G>A   | rs80357368   | Pathogenic | Uncertain significance |
| 4130 | c. 5521A>G   |              | Pathogenic | Uncertain significance |
| 4131 | c. 5519A>C   |              | Benign     | Uncertain significance |
| 4132 | c. 5518G>T   |              | Pathogenic | Uncertain significance |
| 4133 | c. 5518G>A   | rs1567756588 | Pathogenic | Uncertain significance |
| 4134 | c. 5512G>T   | rs730881501  | Benign     | Uncertain significance |
| 4135 | c. 5512G>A   | rs730881501  | Pathogenic | Uncertain significance |
| 4136 | c. 5511G>C   | rs80356914   | Pathogenic | Uncertain significance |
| 4137 | c. 5506G>A   | rs80356942   | Pathogenic | Uncertain significance |
| 4138 | c. 5504G>C   | rs273902776  | Benign     | Uncertain significance |
| 4139 | c. 5504G>A   | rs273902776  | Benign     | Uncertain significance |
| 4140 | c. 5501C>A   |              | Pathogenic | Uncertain significance |
| 4141 | c. 5501C>T   | rs730881500  | Benign     | Uncertain significance |
| 4142 | c. 5498T>C   | rs587782340  | Benign     | Uncertain significance |
| 4143 | c. 5492C>G   | rs587782778  | Benign     | Uncertain significance |
| 4144 | c. 5488G>A   | rs80357393   | Benign     | Uncertain significance |
| 4145 | c. 5485G>A   | rs869320789  | Pathogenic | Uncertain significance |
| 4146 | c. 5482T>G   | rs1060502342 | Benign     | Uncertain significance |
| 4147 | c. 5481G>A   | rs587782432  | Pathogenic | Uncertain significance |
| 4148 | c. 5479A>G   |              | Benign     | Uncertain significance |
| 4149 | c. 5478G>T   | rs80357332   | Pathogenic | Uncertain significance |
| 4150 | c. 5477A>T   | rs730881499  | Pathogenic | Uncertain significance |
| 4151 | c. 5476C>A   | rs587782887  | Benign     | Uncertain significance |
| 4152 | c. 5473G>A   | rs398122700  | Pathogenic | Uncertain significance |
| 4153 | c. 5470A>G   | rs587782026  | Benign     | Uncertain significance |
| 4154 | c. 5468-4C>A |              | Benign     | Uncertain significance |
| 4155 | c. 5458G>A   | rs398122698  | Pathogenic | Uncertain significance |
| 4156 | c. 5447C>G   |              | Benign     | Uncertain significance |
| 4157 | c. 5447C>A   | rs1567757864 | Pathogenic | Uncertain significance |

|      |               |              |            |                        |
|------|---------------|--------------|------------|------------------------|
| 4158 | c. 5444G>C    | rs80356962   | Benign     | Uncertain significance |
| 4159 | c. 5441C>A    |              | Benign     | Uncertain significance |
| 4160 | c. 5438A>T    | rs1555574715 | Benign     | Uncertain significance |
| 4161 | c. 5437G>T    | rs1303996018 | Pathogenic | Uncertain significance |
| 4162 | c. 5433G>C    | rs4438367    | Benign     | Uncertain significance |
| 4163 | c. 5429T>C    | rs80357451   | Benign     | Uncertain significance |
| 4164 | c. 5429T>G    | rs80357451   | Benign     | Uncertain significance |
| 4165 | c. 5426T>C    | rs80357216   | Benign     | Uncertain significance |
| 4166 | c. 5425G>A    | rs28897698   | Pathogenic | Uncertain significance |
| 4167 | c. 5423T>G    | rs80357358   | Benign     | Uncertain significance |
| 4168 | c. 5423T>A    | rs80357358   | Benign     | Uncertain significance |
| 4169 | c. 5423T>C    | rs80357358   | Benign     | Uncertain significance |
| 4170 | c. 5422G>T    | rs1555574756 | Benign     | Uncertain significance |
| 4171 | c. 5419A>T    |              | Benign     | Uncertain significance |
| 4172 | c. 5416C>T    |              | Benign     | Uncertain significance |
| 4173 | c. 5413C>T    | rs587782873  | Benign     | Uncertain significance |
| 4174 | c. 5408G>T    | rs80357149   | Benign     | Uncertain significance |
| 4175 | c. 5407G>T    |              | Benign     | Uncertain significance |
| 4176 | c. 5407G>A    | rs876659510  | Pathogenic | Uncertain significance |
| 4177 | c. 5404A>C    | rs1555575080 | Benign     | Uncertain significance |
| 4178 | c. 5401G>A    | rs587776492  | Pathogenic | Uncertain significance |
| 4179 | c. 5399T>G    |              | Benign     | Uncertain significance |
| 4180 | c. 5396C>T    | rs786201945  | Benign     | Uncertain significance |
| 4181 | c. 5387C>T    | rs80357055   | Benign     | Uncertain significance |
| 4182 | c. 5383C>A    | rs878854958  | Benign     | Uncertain significance |
| 4183 | c. 5383C>T    | rs878854958  | Benign     | Uncertain significance |
| 4184 | c. 5378A>C    | rs730881446  | Benign     | Uncertain significance |
| 4185 | c. 5374G>A    | rs1555575131 | Pathogenic | Uncertain significance |
| 4186 | c. 5374G>C    | rs1555575131 | Benign     | Uncertain significance |
| 4187 | c. 5372T>C    | rs864622244  | Benign     | Uncertain significance |
| 4188 | c. 5371G>A    | rs145758886  | Pathogenic | Uncertain significance |
| 4189 | c. 5371G>T    | rs145758886  | Benign     | Uncertain significance |
| 4190 | c. 5368T>C    | rs1567758993 | Benign     | Uncertain significance |
| 4191 | c. 5365G>C    | rs80357078   | Benign     | Uncertain significance |
| 4192 | c. 5363G>A    | rs80357069   | Pathogenic | Uncertain significance |
| 4193 | c. 5360G>A    |              | Pathogenic | Uncertain significance |
| 4194 | c. 5354A>C    | rs876660057  | Benign     | Uncertain significance |
| 4195 | c. 5350G>A    | rs1060502328 | Pathogenic | Uncertain significance |
| 4196 | c. 5349G>A    | rs587782019  | Pathogenic | Uncertain significance |
| 4197 | c. 5347A>G    | rs80357012   | Benign     | Uncertain significance |
| 4198 | c. 5343A>C    | rs1555575182 | Benign     | Uncertain significance |
| 4199 | c. 5341G>A    |              | Pathogenic | Uncertain significance |
| 4200 | c. 5339T>A    | rs80357474   | Benign     | Uncertain significance |
| 4201 | c. 5339T>G    | rs80357474   | Benign     | Uncertain significance |
| 4202 | c. 5335C>G    |              | Pathogenic | Uncertain significance |
| 4203 | c. 5332+78C>A | rs273901763  | Benign     | Uncertain significance |
| 4204 | c. 5332G>C    | rs80357112   | Benign     | Uncertain significance |
| 4205 | c. 5330C>T    | rs398122696  | Benign     | Uncertain significance |
| 4206 | c. 5329A>T    | rs879255296  | Benign     | Uncertain significance |
| 4207 | c. 5327C>T    | rs398122695  | Benign     | Uncertain significance |
| 4208 | c. 5326C>T    | rs1800757    | Benign     | Uncertain significance |
| 4209 | c. 5325G>A    | rs1135401885 | Pathogenic | Uncertain significance |
| 4210 | c. 5324T>C    |              | Benign     | Uncertain significance |
| 4211 | c. 5321A>G    | rs587781770  | Benign     | Uncertain significance |

|      |               |              |            |                        |
|------|---------------|--------------|------------|------------------------|
| 4212 | c. 5320A>C    |              | Benign     | Uncertain significance |
| 4213 | c. 5318C>T    | rs80357428   | Benign     | Uncertain significance |
| 4214 | c. 5315T>G    | rs1555575700 | Benign     | Uncertain significance |
| 4215 | c. 5312C>T    | rs80357025   | Benign     | Uncertain significance |
| 4216 | c. 5312C>G    | rs80357025   | Benign     | Uncertain significance |
| 4217 | c. 5311C>T    |              | Benign     | Uncertain significance |
| 4218 | c. 5309G>C    | rs863224765  | Pathogenic | Uncertain significance |
| 4219 | c. 5303G>A    | rs730881497  | Pathogenic | Uncertain significance |
| 4220 | c. 5302T>G    | rs431825416  | Benign     | Uncertain significance |
| 4221 | c. 5300G>C    |              | Benign     | Uncertain significance |
| 4222 | c. 5299T>C    | rs1567760645 | Benign     | Uncertain significance |
| 4223 | c. 5296A>G    | rs886039314  | Benign     | Uncertain significance |
| 4224 | c. 5288G>T    | rs80357007   | Benign     | Uncertain significance |
| 4225 | c. 5287G>C    | rs876660907  | Pathogenic | Uncertain significance |
| 4226 | c. 5285G>C    |              | Benign     | Uncertain significance |
| 4227 | c. 5285G>T    | rs398122694  | Benign     | Uncertain significance |
| 4228 | c. 5282T>G    | rs80356905   | Benign     | Uncertain significance |
| 4229 | c. 5281T>C    | rs1567760717 | Benign     | Uncertain significance |
| 4230 | c. 5277+77C>A | rs273901758  | Benign     | Uncertain significance |
| 4231 | c. 5277+7C>T  |              | Benign     | Uncertain significance |
| 4232 | c. 5276A>G    | rs431825415  | Benign     | Uncertain significance |
| 4233 | c. 5272A>G    |              | Pathogenic | Uncertain significance |
| 4234 | c. 5271C>A    |              | Benign     | Uncertain significance |
| 4235 | c. 5269G>A    | rs863224764  | Pathogenic | Uncertain significance |
| 4236 | c. 5269G>T    | rs863224764  | Pathogenic | Uncertain significance |
| 4237 | c. 5269G>C    | rs863224764  | Benign     | Uncertain significance |
| 4238 | c. 5267A>G    | rs1567764257 | Pathogenic | Uncertain significance |
| 4239 | c. 5265C>T    | rs1555576855 | Benign     | Uncertain significance |
| 4240 | c. 5264C>T    | rs1555576858 | Benign     | Uncertain significance |
| 4241 | c. 5260G>C    | rs80357432   | Benign     | Uncertain significance |
| 4242 | c. 5259A>T    | rs771577266  | Pathogenic | Uncertain significance |
| 4243 | c. 5255C>G    | rs80357028   | Benign     | Uncertain significance |
| 4244 | c. 5255C>T    | rs80357028   | Pathogenic | Uncertain significance |
| 4245 | c. 5254G>A    | rs80357074   | Pathogenic | Uncertain significance |
| 4246 | c. 5252G>T    | rs80357442   | Benign     | Uncertain significance |
| 4247 | c. 5251C>G    | rs80357123   | Benign     | Uncertain significance |
| 4248 | c. 5246C>T    | rs80357462   | Benign     | Uncertain significance |
| 4249 | c. 5245C>A    | rs397509244  | Benign     | Uncertain significance |
| 4250 | c. 5243G>T    | rs397509243  | Pathogenic | Uncertain significance |
| 4251 | c. 5238C>G    | rs786202389  | Benign     | Uncertain significance |
| 4252 | c. 5237A>C    | rs876659991  | Benign     | Uncertain significance |
| 4253 | c. 5236C>G    | rs80357146   | Benign     | Uncertain significance |
| 4254 | c. 5236C>T    | rs80357146   | Benign     | Uncertain significance |
| 4255 | c. 5236C>A    | rs80357146   | Benign     | Uncertain significance |
| 4256 | c. 5234A>G    | rs1567764456 | Benign     | Uncertain significance |
| 4257 | c. 5231G>A    | rs1567764460 | Pathogenic | Uncertain significance |
| 4258 | c. 5228G>C    | rs1346819781 | Benign     | Uncertain significance |
| 4259 | c. 5225A>G    | rs864622104  | Benign     | Uncertain significance |
| 4260 | c. 5224A>G    |              | Pathogenic | Uncertain significance |
| 4261 | c. 5222T>G    | rs80357023   | Benign     | Uncertain significance |
| 4262 | c. 5221G>A    | rs876659122  | Pathogenic | Uncertain significance |
| 4263 | c. 5219T>C    | rs1555576951 | Benign     | Uncertain significance |
| 4264 | c. 5217T>G    | rs80357340   | Benign     | Uncertain significance |
| 4265 | c. 5215G>C    | rs80357283   | Benign     | Uncertain significance |



|      |               |              |            |                        |
|------|---------------|--------------|------------|------------------------|
| 4266 | c. 5215G>A    | rs80357283   | Pathogenic | Uncertain significance |
| 4267 | c. 5215G>T    | rs80357283   | Pathogenic | Uncertain significance |
| 4268 | c. 5205A>T    | rs431825412  | Pathogenic | Uncertain significance |
| 4269 | c. 5202T>G    | rs869320780  | Benign     | Uncertain significance |
| 4270 | c. 5201T>G    |              | Benign     | Uncertain significance |
| 4271 | c. 5200T>A    | rs80356957   | Pathogenic | Uncertain significance |
| 4272 | c. 5200T>C    | rs80356957   | Benign     | Uncertain significance |
| 4273 | c. 5198A>T    | rs80357270   | Benign     | Uncertain significance |
| 4274 | c. 5197G>C    | rs398122693  | Benign     | Uncertain significance |
| 4275 | c. 5197G>A    | rs398122693  | Pathogenic | Uncertain significance |
| 4276 | c. 5196T>A    |              | Benign     | Uncertain significance |
| 4277 | c. 5195A>G    |              | Benign     | Uncertain significance |
| 4278 | c. 5193+13T>A | rs273901750  | Benign     | Uncertain significance |
| 4279 | c. 5191G>A    | rs397507244  | Pathogenic | Uncertain significance |
| 4280 | c. 5189A>T    | rs80357171   | Benign     | Uncertain significance |
| 4281 | c. 5186T>C    |              | Benign     | Uncertain significance |
| 4282 | c. 5186T>A    | rs730881496  | Benign     | Uncertain significance |
| 4283 | c. 5179A>C    | rs80357347   | Benign     | Uncertain significance |
| 4284 | c. 5177G>C    | rs786203547  | Benign     | Uncertain significance |
| 4285 | c. 5177G>T    | rs786203547  | Pathogenic | Uncertain significance |
| 4286 | c. 5175A>C    | rs191373374  | Benign     | Uncertain significance |
| 4287 | c. 5172A>C    | rs879254150  | Benign     | Uncertain significance |
| 4288 | c. 5168T>C    | rs1064793533 | Benign     | Uncertain significance |
| 4289 | c. 5168T>A    | rs1064793533 | Benign     | Uncertain significance |
| 4290 | c. 5167A>G    | rs1426821558 | Pathogenic | Uncertain significance |
| 4291 | c. 5165C>A    | rs80357104   | Pathogenic | Uncertain significance |
| 4292 | c. 5161C>G    | rs878854957  | Benign     | Uncertain significance |
| 4293 | c. 5156T>C    |              | Benign     | Uncertain significance |
| 4294 | c. 5156T>G    | rs1247437511 | Benign     | Uncertain significance |
| 4295 | c. 5155G>A    |              | Pathogenic | Uncertain significance |
| 4296 | c. 5155G>T    | rs749465132  | Benign     | Uncertain significance |
| 4297 | c. 5153G>T    |              | Benign     | Uncertain significance |
| 4298 | c. 5153-42T>A | rs273901747  | Benign     | Uncertain significance |
| 4299 | c. 5153-66T>A | rs273901748  | Benign     | Uncertain significance |
| 4300 | c. 5152T>G    | rs1567769155 | Benign     | Uncertain significance |
| 4301 | c. 5147A>C    | rs587782456  | Benign     | Uncertain significance |
| 4302 | c. 5147A>G    | rs587782456  | Pathogenic | Uncertain significance |
| 4303 | c. 5146T>C    |              | Benign     | Uncertain significance |
| 4304 | c. 5146T>A    |              | Benign     | Uncertain significance |
| 4305 | c. 5145C>A    | rs80357094   | Pathogenic | Uncertain significance |
| 4306 | c. 5144G>T    | rs45444999   | Benign     | Uncertain significance |
| 4307 | c. 5141T>C    | rs80357243   | Benign     | Uncertain significance |
| 4308 | c. 5140G>T    | rs1567769244 | Benign     | Uncertain significance |
| 4309 | c. 5137G>A    | rs1064793309 | Pathogenic | Uncertain significance |
| 4310 | c. 5133A>G    |              | Benign     | Uncertain significance |
| 4311 | c. 5131A>C    | rs886040272  | Benign     | Uncertain significance |
| 4312 | c. 5129G>A    | rs398122691  | Benign     | Uncertain significance |
| 4313 | c. 5128G>A    |              | Pathogenic | Uncertain significance |
| 4314 | c. 5126G>A    | rs786204269  | Pathogenic | Uncertain significance |
| 4315 | c. 5125G>A    | rs886038197  | Benign     | Uncertain significance |
| 4316 | c. 5123C>T    | rs28897696   | Benign     | Uncertain significance |
| 4317 | c. 5122G>A    | rs397507243  | Pathogenic | Uncertain significance |
| 4318 | c. 5120T>C    | rs1064796143 | Benign     | Uncertain significance |
| 4319 | c. 5120T>G    | rs1064796143 | Benign     | Uncertain significance |



|      |              |              |            |                        |
|------|--------------|--------------|------------|------------------------|
| 4320 | c. 5119A>C   |              | Benign     | Uncertain significance |
| 4321 | c. 5116G>C   | rs886040864  | Benign     | Uncertain significance |
| 4322 | c. 5114T>G   | rs397507242  | Benign     | Uncertain significance |
| 4323 | c. 5113C>G   | rs80356858   | Benign     | Uncertain significance |
| 4324 | c. 5111T>A   | rs1555578598 | Pathogenic | Uncertain significance |
| 4325 | c. 5110T>C   | rs1555578599 | Benign     | Uncertain significance |
| 4326 | c. 5107T>G   | rs863224763  | Benign     | Uncertain significance |
| 4327 | c. 5107T>C   | rs863224763  | Benign     | Uncertain significance |
| 4328 | c. 5102T>C   |              | Benign     | Uncertain significance |
| 4329 | c. 5101C>A   | rs910555398  | Benign     | Uncertain significance |
| 4330 | c. 5098A>C   | rs397509227  | Benign     | Uncertain significance |
| 4331 | c. 5096G>T   | rs41293459   | Benign     | Uncertain significance |
| 4332 | c. 5096G>C   | rs41293459   | Benign     | Uncertain significance |
| 4333 | c. 5091T>G   |              | Benign     | Uncertain significance |
| 4334 | c. 5089T>A   | rs80356993   | Benign     | Uncertain significance |
| 4335 | c. 5087T>C   | rs397509226  | Benign     | Uncertain significance |
| 4336 | c. 5086G>A   | rs80357125   | Pathogenic | Uncertain significance |
| 4337 | c. 5086G>T   | rs80357125   | Benign     | Uncertain significance |
| 4338 | c. 5086G>C   | rs80357125   | Benign     | Uncertain significance |
| 4339 | c. 5085T>A   | rs80357387   | Pathogenic | Uncertain significance |
| 4340 | c. 5081A>G   | rs1567769562 | Pathogenic | Uncertain significance |
| 4341 | c. 5080G>A   | rs80356896   | Pathogenic | Uncertain significance |
| 4342 | c. 5078C>T   | rs1567769586 | Benign     | Uncertain significance |
| 4343 | c. 5075A>C   | rs397509222  | Benign     | Uncertain significance |
| 4344 | c. 5075A>T   | rs397509222  | Benign     | Uncertain significance |
| 4345 | c. 5075-4G>T |              | Benign     | Uncertain significance |
| 4346 | c. 5074+7C>T |              | Benign     | Uncertain significance |
| 4347 | c. 5074+4T>A |              | Benign     | Uncertain significance |
| 4348 | c. 5073A>C   | rs80356853   | Benign     | Uncertain significance |
| 4349 | c. 5073A>G   | rs80356853   | Pathogenic | Uncertain significance |
| 4350 | c. 5071A>G   | rs397509219  | Benign     | Uncertain significance |
| 4351 | c. 5067G>A   |              | Pathogenic | Uncertain significance |
| 4352 | c. 5066T>C   | rs80357061   | Benign     | Uncertain significance |
| 4353 | c. 5065A>C   | rs1555579619 | Benign     | Uncertain significance |
| 4354 | c. 5065A>G   | rs1555579619 | Pathogenic | Uncertain significance |
| 4355 | c. 5064T>C   | rs1567771967 | Benign     | Uncertain significance |
| 4356 | c. 5063T>C   |              | Benign     | Uncertain significance |
| 4357 | c. 5060T>G   | rs1555579627 | Benign     | Uncertain significance |
| 4358 | c. 5057A>C   | rs730882166  | Benign     | Uncertain significance |
| 4359 | c. 5056C>T   | rs1555579648 | Benign     | Uncertain significance |
| 4360 | c. 5050A>T   |              | Pathogenic | Uncertain significance |
| 4361 | c. 5050A>G   | rs879255491  | Benign     | Uncertain significance |
| 4362 | c. 5050A>C   | rs879255491  | Benign     | Uncertain significance |
| 4363 | c. 5048A>G   |              | Pathogenic | Uncertain significance |
| 4364 | c. 5045A>T   | rs80357265   | Pathogenic | Uncertain significance |
| 4365 | c. 5044G>C   |              | Benign     | Uncertain significance |
| 4366 | c. 5042C>T   | rs766784305  | Benign     | Uncertain significance |
| 4367 | c. 5041A>C   | rs876659314  | Benign     | Uncertain significance |
| 4368 | c. 5036T>C   | rs760038328  | Benign     | Uncertain significance |
| 4369 | c. 5035C>G   |              | Benign     | Uncertain significance |
| 4370 | c. 5030C>T   | rs876660263  | Benign     | Uncertain significance |
| 4371 | c. 5028A>T   | rs1064793596 | Benign     | Uncertain significance |
| 4372 | c. 5023A>T   |              | Benign     | Uncertain significance |
| 4373 | c. 5018A>G   | rs1064793913 | Benign     | Uncertain significance |

|      |            |              |            |                        |
|------|------------|--------------|------------|------------------------|
| 4374 | c. 5015A>T | rs1567772328 | Benign     | Uncertain significance |
| 4375 | c. 5006C>T | rs1057518640 | Benign     | Uncertain significance |
| 4376 | c. 5003T>G | rs1567772408 | Benign     | Uncertain significance |
| 4377 | c. 5003T>C | rs1567772408 | Benign     | Uncertain significance |
| 4378 | c. 5002T>A | rs587781472  | Benign     | Uncertain significance |
| 4379 | c. 5000A>G | rs1057519495 | Benign     | Uncertain significance |
| 4380 | c. 4999A>G | rs80357204   | Benign     | Uncertain significance |
| 4381 | c. 4997A>G | rs397509216  | Pathogenic | Uncertain significance |
| 4382 | c. 4994T>G |              | Benign     | Uncertain significance |
| 4383 | c. 4993G>T |              | Benign     | Uncertain significance |
| 4384 | c. 4993G>C | rs80357169   | Benign     | Uncertain significance |
| 4385 | c. 4988T>A | rs80357205   | Benign     | Uncertain significance |
| 4386 | c. 4987A>T | rs80357117   | Benign     | Uncertain significance |
| 4387 | c. 4981G>A | rs80357401   | Pathogenic | Uncertain significance |
| 4388 | c. 4973C>A | rs1015073230 | Benign     | Uncertain significance |
| 4389 | c. 4967G>A | rs80357414   | Benign     | Uncertain significance |
| 4390 | c. 4957G>A | rs80357261   | Benign     | Uncertain significance |
| 4391 | c. 4955T>A | rs80356968   | Benign     | Uncertain significance |
| 4392 | c. 4954A>G | rs1348949389 | Benign     | Uncertain significance |
| 4393 | c. 4952C>T | rs80356938   | Benign     | Uncertain significance |
| 4394 | c. 4951T>C | rs879254042  | Benign     | Uncertain significance |
| 4395 | c. 4950G>A |              | Pathogenic | Uncertain significance |
| 4396 | c. 4949T>C | rs778487856  | Benign     | Uncertain significance |
| 4397 | c. 4946G>C | rs876660509  | Benign     | Uncertain significance |
| 4398 | c. 4942A>G |              | Benign     | Uncertain significance |
| 4399 | c. 4934G>T | rs70953661   | Benign     | Uncertain significance |
| 4400 | c. 4933A>G | rs80356926   | Benign     | Uncertain significance |
| 4401 | c. 4931A>G | rs80357016   | Benign     | Uncertain significance |
| 4402 | c. 4922C>T |              | Benign     | Uncertain significance |
| 4403 | c. 4921G>A | rs1800726    | Pathogenic | Uncertain significance |
| 4404 | c. 4918A>G | rs1555580683 | Benign     | Uncertain significance |
| 4405 | c. 4916T>C | rs1567774676 | Benign     | Uncertain significance |
| 4406 | c. 4910C>A | rs80357048   | Pathogenic | Uncertain significance |
| 4407 | c. 4909C>T | rs876659989  | Benign     | Uncertain significance |
| 4408 | c. 4903G>C | rs200432771  | Benign     | Uncertain significance |
| 4409 | c. 4903G>A | rs200432771  | Pathogenic | Uncertain significance |
| 4410 | c. 4900A>G |              | Pathogenic | Uncertain significance |
| 4411 | c. 4899C>A | rs1567774741 | Benign     | Uncertain significance |
| 4412 | c. 4897A>C | rs1555580711 | Benign     | Uncertain significance |
| 4413 | c. 4895T>G | rs1397965282 | Benign     | Uncertain significance |
| 4414 | c. 4894G>C | rs770193975  | Pathogenic | Uncertain significance |
| 4415 | c. 4894G>A | rs770193975  | Pathogenic | Uncertain significance |
| 4416 | c. 4894G>T | rs770193975  | Benign     | Uncertain significance |
| 4417 | c. 4893T>A | rs80356850   | Benign     | Uncertain significance |
| 4418 | c. 4892G>A | rs273901742  | Benign     | Uncertain significance |
| 4419 | c. 4891A>T | rs786202734  | Pathogenic | Uncertain significance |
| 4420 | c. 4884G>T | rs80357158   | Benign     | Uncertain significance |
| 4421 | c. 4879G>T |              | Benign     | Uncertain significance |
| 4422 | c. 4879G>A | rs774505084  | Pathogenic | Uncertain significance |
| 4423 | c. 4874A>G | rs730881494  | Pathogenic | Uncertain significance |
| 4424 | c. 4873T>A |              | Pathogenic | Uncertain significance |
| 4425 | c. 4871G>A | rs1555580767 | Pathogenic | Uncertain significance |
| 4426 | c. 4865C>G | rs786202573  | Benign     | Uncertain significance |
| 4427 | c. 4864A>G | rs786202026  | Pathogenic | Uncertain significance |

|      |            |              |            |                        |
|------|------------|--------------|------------|------------------------|
| 4428 | c. 4862A>C | rs1555580777 | Benign     | Uncertain significance |
| 4429 | c. 4856C>T | rs876659163  | Benign     | Uncertain significance |
| 4430 | c. 4853A>G | rs1277159752 | Pathogenic | Uncertain significance |
| 4431 | c. 4852C>T | rs755920262  | Benign     | Uncertain significance |
| 4432 | c. 4852C>A | rs755920262  | Benign     | Uncertain significance |
| 4433 | c. 4844C>T | rs1555580805 | Benign     | Uncertain significance |
| 4434 | c. 4843G>C |              | Benign     | Uncertain significance |
| 4435 | c. 4843G>A | rs80356987   | Pathogenic | Uncertain significance |
| 4436 | c. 4841C>T | rs766305255  | Benign     | Uncertain significance |
| 4437 | c. 4838G>A | rs1555580821 | Benign     | Uncertain significance |
| 4438 | c. 4836G>C | rs747688901  | Benign     | Uncertain significance |
| 4439 | c. 4826A>G | rs483353096  | Benign     | Uncertain significance |
| 4440 | c. 4823C>T | rs80357072   | Pathogenic | Uncertain significance |
| 4441 | c. 4822G>A | rs1567775064 | Pathogenic | Uncertain significance |
| 4442 | c. 4814T>C |              | Benign     | Uncertain significance |
| 4443 | c. 4813T>A | rs80356833   | Benign     | Uncertain significance |
| 4444 | c. 4813T>G | rs80356833   | Benign     | Uncertain significance |
| 4445 | c. 4811A>G | rs80357439   | Benign     | Uncertain significance |
| 4446 | c. 4810C>G |              | Benign     | Uncertain significance |
| 4447 | c. 4808C>T | rs1064794054 | Benign     | Uncertain significance |
| 4448 | c. 4804G>T |              | Benign     | Uncertain significance |
| 4449 | c. 4801A>C | rs80357303   | Benign     | Uncertain significance |
| 4450 | c. 4796C>T |              | Benign     | Uncertain significance |
| 4451 | c. 4795G>A |              | Pathogenic | Uncertain significance |
| 4452 | c. 4790C>A | rs587781623  | Benign     | Uncertain significance |
| 4453 | c. 4789A>G | rs80357187   | Benign     | Uncertain significance |
| 4454 | c. 4787C>T | rs80357429   | Benign     | Uncertain significance |
| 4455 | c. 4786T>G |              | Benign     | Uncertain significance |
| 4456 | c. 4783T>A |              | Benign     | Uncertain significance |
| 4457 | c. 4783T>C | rs1325644035 | Benign     | Uncertain significance |
| 4458 | c. 4781C>A | rs1301724072 | Benign     | Uncertain significance |
| 4459 | c. 4780C>T | rs587782012  | Benign     | Uncertain significance |
| 4460 | c. 4780C>G | rs587782012  | Benign     | Uncertain significance |
| 4461 | c. 4777A>G | rs397509197  | Benign     | Uncertain significance |
| 4462 | c. 4774A>C | rs1567775261 | Benign     | Uncertain significance |
| 4463 | c. 4772G>A | rs1555580956 | Benign     | Uncertain significance |
| 4464 | c. 4771G>A | rs587782825  | Pathogenic | Uncertain significance |
| 4465 | c. 4769T>C | rs773524529  | Benign     | Uncertain significance |
| 4466 | c. 4765C>G | rs80357002   | Benign     | Uncertain significance |
| 4467 | c. 4751C>T | rs1060502323 | Benign     | Uncertain significance |
| 4468 | c. 4748G>A | rs752624544  | Pathogenic | Uncertain significance |
| 4469 | c. 4739C>A | rs80357411   | Pathogenic | Uncertain significance |
| 4470 | c. 4739C>T | rs80357411   | Benign     | Uncertain significance |
| 4471 | c. 4733A>G | rs80356930   | Benign     | Uncertain significance |
| 4472 | c. 4730C>T | rs273901741  | Benign     | Uncertain significance |
| 4473 | c. 4730C>A | rs273901741  | Pathogenic | Uncertain significance |
| 4474 | c. 4727A>G | rs876659007  | Benign     | Uncertain significance |
| 4475 | c. 4726G>A | rs1060502355 | Pathogenic | Uncertain significance |
| 4476 | c. 4724C>A | rs80357052   | Benign     | Uncertain significance |
| 4477 | c. 4717G>C | rs1188628175 | Benign     | Uncertain significance |
| 4478 | c. 4713C>G | rs768945711  | Benign     | Uncertain significance |
| 4479 | c. 4712T>C | rs273901740  | Benign     | Uncertain significance |
| 4480 | c. 4704C>T | rs886037793  | Benign     | Uncertain significance |
| 4481 | c. 4702A>G | rs80357119   | Benign     | Uncertain significance |

|      |              |              |            |                        |
|------|--------------|--------------|------------|------------------------|
| 4482 | c. 4700G>T   | rs1555581074 | Pathogenic | Uncertain significance |
| 4483 | c. 4699G>A   | rs568753972  | Pathogenic | Uncertain significance |
| 4484 | c. 4698T>G   | rs1246456207 | Benign     | Uncertain significance |
| 4485 | c. 4697C>G   | rs1060502325 | Pathogenic | Uncertain significance |
| 4486 | c. 4697C>A   | rs1060502325 | Pathogenic | Uncertain significance |
| 4487 | c. 4696T>G   | rs730881493  | Benign     | Uncertain significance |
| 4488 | c. 4693G>A   | rs863224762  | Pathogenic | Uncertain significance |
| 4489 | c. 4685C>T   | rs80357096   | Benign     | Uncertain significance |
| 4490 | c. 4682C>A   | rs56158747   | Benign     | Uncertain significance |
| 4491 | c. 4679G>T   | rs564757581  | Pathogenic | Uncertain significance |
| 4492 | c. 4677G>C   | rs587781876  | Benign     | Uncertain significance |
| 4493 | c. 4675+3A>C |              | Benign     | Uncertain significance |
| 4494 | c. 4674A>G   | rs996042036  | Pathogenic | Uncertain significance |
| 4495 | c. 4673T>G   |              | Benign     | Uncertain significance |
| 4496 | c. 4672C>G   | rs1555581794 | Benign     | Uncertain significance |
| 4497 | c. 4671T>G   |              | Benign     | Uncertain significance |
| 4498 | c. 4670A>G   | rs869320779  | Benign     | Uncertain significance |
| 4499 | c. 4669G>A   | rs80356906   | Benign     | Uncertain significance |
| 4500 | c. 4669G>T   | rs80356906   | Pathogenic | Uncertain significance |
| 4501 | c. 4669G>C   | rs80356906   | Benign     | Uncertain significance |
| 4502 | c. 4667A>G   | rs1555581811 | Benign     | Uncertain significance |
| 4503 | c. 4664G>A   | rs786202165  | Benign     | Uncertain significance |
| 4504 | c. 4649C>T   | rs80357076   | Benign     | Uncertain significance |
| 4505 | c. 4647A>C   | rs1371814796 | Benign     | Uncertain significance |
| 4506 | c. 4646A>T   | rs876659001  | Pathogenic | Uncertain significance |
| 4507 | c. 4641G>C   |              | Benign     | Uncertain significance |
| 4508 | c. 4641G>T   | rs864622265  | Pathogenic | Uncertain significance |
| 4509 | c. 4639T>G   | rs730881492  | Pathogenic | Uncertain significance |
| 4510 | c. 4639T>A   | rs730881492  | Pathogenic | Uncertain significance |
| 4511 | c. 4636G>C   | rs28897691   | Benign     | Uncertain significance |
| 4512 | c. 4634A>G   |              | Benign     | Uncertain significance |
| 4513 | c. 4631C>T   | rs80356917   | Benign     | Uncertain significance |
| 4514 | c. 4618G>C   |              | Benign     | Uncertain significance |
| 4515 | c. 4616T>C   | rs377629427  | Benign     | Uncertain significance |
| 4516 | c. 4606G>C   | rs876660460  | Benign     | Uncertain significance |
| 4517 | c. 4603G>A   | rs80357366   | Pathogenic | Uncertain significance |
| 4518 | c. 4597G>A   | rs899108857  | Pathogenic | Uncertain significance |
| 4519 | c. 4597G>T   | rs899108857  | Pathogenic | Uncertain significance |
| 4520 | c. 4594G>A   | rs786201658  | Pathogenic | Uncertain significance |
| 4521 | c. 4591G>T   |              | Pathogenic | Uncertain significance |
| 4522 | c. 4591G>A   | rs1555581897 | Pathogenic | Uncertain significance |
| 4523 | c. 4589A>C   | rs398122689  | Benign     | Uncertain significance |
| 4524 | c. 4588A>C   |              | Benign     | Uncertain significance |
| 4525 | c. 4583T>C   | rs1555581911 | Benign     | Uncertain significance |
| 4526 | c. 4580A>G   |              | Pathogenic | Uncertain significance |
| 4527 | c. 4579G>A   | rs80357237   | Pathogenic | Uncertain significance |
| 4528 | c. 4576G>A   | rs878853294  | Pathogenic | Uncertain significance |
| 4529 | c. 4574A>G   | rs786203386  | Benign     | Uncertain significance |
| 4530 | c. 4571C>G   | rs1555581944 | Benign     | Uncertain significance |
| 4531 | c. 4568C>T   | rs1555581955 | Benign     | Uncertain significance |
| 4532 | c. 4567C>G   |              | Pathogenic | Uncertain significance |
| 4533 | c. 4564T>C   | rs1567778091 | Benign     | Uncertain significance |
| 4534 | c. 4559G>C   | rs1555581971 | Benign     | Uncertain significance |
| 4535 | c. 4555A>G   | rs1567778111 | Benign     | Uncertain significance |

|      |              |              |            |                        |
|------|--------------|--------------|------------|------------------------|
| 4536 | c. 4552C>A   | rs80356881   | Pathogenic | Uncertain significance |
| 4537 | c. 4552C>G   | rs80356881   | Pathogenic | Uncertain significance |
| 4538 | c. 4550T>C   | rs1555581980 | Benign     | Uncertain significance |
| 4539 | c. 4549C>T   |              | Benign     | Uncertain significance |
| 4540 | c. 4549C>G   | rs137894496  | Benign     | Uncertain significance |
| 4541 | c. 4541C>T   | rs863224761  | Benign     | Uncertain significance |
| 4542 | c. 4534A>G   |              | Pathogenic | Uncertain significance |
| 4543 | c. 4534A>T   | rs80357137   | Pathogenic | Uncertain significance |
| 4544 | c. 4533C>A   | rs1567778195 | Benign     | Uncertain significance |
| 4545 | c. 4532A>C   | rs1555582004 | Benign     | Uncertain significance |
| 4546 | c. 4530G>A   | rs1555582010 | Pathogenic | Uncertain significance |
| 4547 | c. 4529T>C   | rs1064794378 | Benign     | Uncertain significance |
| 4548 | c. 4526A>G   | rs1555582023 | Pathogenic | Uncertain significance |
| 4549 | c. 4519A>G   | rs1567778299 | Pathogenic | Uncertain significance |
| 4550 | c. 4514A>G   |              | Benign     | Uncertain significance |
| 4551 | c. 4514A>T   | rs1567778319 | Benign     | Uncertain significance |
| 4552 | c. 4513G>C   | rs1555582052 | Benign     | Uncertain significance |
| 4553 | c. 4510T>G   | rs1567778337 | Benign     | Uncertain significance |
| 4554 | c. 4505C>T   |              | Benign     | Uncertain significance |
| 4555 | c. 4504C>T   | rs80357383   | Benign     | Uncertain significance |
| 4556 | c. 4493C>G   | rs1555582079 | Benign     | Uncertain significance |
| 4557 | c. 4492C>T   |              | Benign     | Uncertain significance |
| 4558 | c. 4485G>C   | rs1064793833 | Benign     | Uncertain significance |
| 4559 | c. 4484+3A>C |              | Benign     | Uncertain significance |
| 4560 | c. 4481A>G   | rs758779691  | Benign     | Uncertain significance |
| 4561 | c. 4480G>A   | rs80357148   | Pathogenic | Uncertain significance |
| 4562 | c. 4477G>A   | rs949577051  | Benign     | Uncertain significance |
| 4563 | c. 4475G>A   |              | Pathogenic | Uncertain significance |
| 4564 | c. 4474G>A   |              | Pathogenic | Uncertain significance |
| 4565 | c. 4471C>T   |              | Benign     | Uncertain significance |
| 4566 | c. 4471C>A   | rs111034213  | Benign     | Uncertain significance |
| 4567 | c. 4470A>T   | rs1555582549 | Benign     | Uncertain significance |
| 4568 | c. 4466A>G   | rs587781880  | Benign     | Uncertain significance |
| 4569 | c. 4463A>C   | rs1567779520 | Benign     | Uncertain significance |
| 4570 | c. 4460A>G   | rs80357126   | Benign     | Uncertain significance |
| 4571 | c. 4458T>G   | rs879255285  | Benign     | Uncertain significance |
| 4572 | c. 4456A>T   | rs397507232  | Pathogenic | Uncertain significance |
| 4573 | c. 4454C>G   |              | Benign     | Uncertain significance |
| 4574 | c. 4454C>T   | rs80356870   | Benign     | Uncertain significance |
| 4575 | c. 4450T>G   | rs80357404   | Benign     | Uncertain significance |
| 4576 | c. 4450T>A   | rs80357404   | Benign     | Uncertain significance |
| 4577 | c. 4449T>A   | rs1555582581 | Benign     | Uncertain significance |
| 4578 | c. 4447A>C   | rs1555582583 | Benign     | Uncertain significance |
| 4579 | c. 4446T>G   | rs1555582586 | Benign     | Uncertain significance |
| 4580 | c. 4445A>G   |              | Benign     | Uncertain significance |
| 4581 | c. 4445A>T   | rs757726297  | Benign     | Uncertain significance |
| 4582 | c. 4441G>A   | rs1135401828 | Pathogenic | Uncertain significance |
| 4583 | c. 4435G>C   | rs786203524  | Benign     | Uncertain significance |
| 4584 | c. 4434G>C   | rs1555582594 | Benign     | Uncertain significance |
| 4585 | c. 4430T>C   | rs876660550  | Benign     | Uncertain significance |
| 4586 | c. 4429T>G   |              | Benign     | Uncertain significance |
| 4587 | c. 4427A>C   | rs750437234  | Benign     | Uncertain significance |
| 4588 | c. 4423G>T   | rs876660940  | Pathogenic | Uncertain significance |
| 4589 | c. 4420G>A   | rs1555582616 | Pathogenic | Uncertain significance |



|      |              |              |            |                        |
|------|--------------|--------------|------------|------------------------|
| 4590 | c. 4417T>C   | rs398122686  | Benign     | Uncertain significance |
| 4591 | c. 4414C>T   | rs200582930  | Benign     | Uncertain significance |
| 4592 | c. 4412G>A   | rs587782708  | Benign     | Uncertain significance |
| 4593 | c. 4412G>T   | rs587782708  | Benign     | Uncertain significance |
| 4594 | c. 4412G>C   | rs587782708  | Benign     | Uncertain significance |
| 4595 | c. 4411G>A   | rs1567779701 | Benign     | Uncertain significance |
| 4596 | c. 4405C>A   |              | Benign     | Uncertain significance |
| 4597 | c. 4405C>T   | rs80356960   | Benign     | Uncertain significance |
| 4598 | c. 4402A>G   | rs80357022   | Benign     | Uncertain significance |
| 4599 | c. 4396A>T   | rs1064794830 | Pathogenic | Uncertain significance |
| 4600 | c. 4393A>G   |              | Pathogenic | Uncertain significance |
| 4601 | c. 4390C>G   |              | Pathogenic | Uncertain significance |
| 4602 | c. 4390C>T   | rs1259139517 | Benign     | Uncertain significance |
| 4603 | c. 4390C>A   | rs1259139517 | Pathogenic | Uncertain significance |
| 4604 | c. 4385A>T   |              | Pathogenic | Uncertain significance |
| 4605 | c. 4384G>A   | rs141255461  | Pathogenic | Uncertain significance |
| 4606 | c. 4383T>A   | rs431825408  | Benign     | Uncertain significance |
| 4607 | c. 4382G>C   | rs1555582692 | Benign     | Uncertain significance |
| 4608 | c. 4379G>A   | rs397509167  | Pathogenic | Uncertain significance |
| 4609 | c. 4376A>G   | rs1555582697 | Benign     | Uncertain significance |
| 4610 | c. 4370C>T   |              | Benign     | Uncertain significance |
| 4611 | c. 4369T>A   |              | Benign     | Uncertain significance |
| 4612 | c. 4367C>T   |              | Benign     | Uncertain significance |
| 4613 | c. 4366A>G   | rs786201835  | Benign     | Uncertain significance |
| 4614 | c. 4360G>A   | rs1555582714 | Pathogenic | Uncertain significance |
| 4615 | c. 4358C>T   | rs1171055085 | Benign     | Uncertain significance |
| 4616 | c. 4358-1G>T |              | Benign     | Uncertain significance |
| 4617 | c. 4358-6T>C | rs1135401875 | Benign     | Uncertain significance |
| 4618 | c. 4357G>T   | rs1555583984 | Benign     | Uncertain significance |
| 4619 | c. 4351G>A   | rs1555583989 | Pathogenic | Uncertain significance |
| 4620 | c. 4349C>T   | rs886040226  | Benign     | Uncertain significance |
| 4621 | c. 4344C>G   |              | Benign     | Uncertain significance |
| 4622 | c. 4339C>A   | rs80357067   | Benign     | Uncertain significance |
| 4623 | c. 4338A>T   | rs1555584018 | Benign     | Uncertain significance |
| 4624 | c. 4337A>G   | rs1273755215 | Benign     | Uncertain significance |
| 4625 | c. 4337A>C   | rs1273755215 | Benign     | Uncertain significance |
| 4626 | c. 4333C>A   | rs876660684  | Benign     | Uncertain significance |
| 4627 | c. 4331A>T   |              | Benign     | Uncertain significance |
| 4628 | c. 4319A>G   | rs786202288  | Pathogenic | Uncertain significance |
| 4629 | c. 4318G>A   |              | Pathogenic | Uncertain significance |
| 4630 | c. 4318G>C   | rs1555584070 | Benign     | Uncertain significance |
| 4631 | c. 4312G>A   |              | Pathogenic | Uncertain significance |
| 4632 | c. 4310C>T   | rs1555584083 | Benign     | Uncertain significance |
| 4633 | c. 4305C>G   | rs730881445  | Benign     | Uncertain significance |
| 4634 | c. 4304A>T   |              | Benign     | Uncertain significance |
| 4635 | c. 4304A>G   | rs876660809  | Benign     | Uncertain significance |
| 4636 | c. 4300A>G   |              | Benign     | Uncertain significance |
| 4637 | c. 4297A>G   | rs541512953  | Pathogenic | Uncertain significance |
| 4638 | c. 4292C>T   | rs748839289  | Benign     | Uncertain significance |
| 4639 | c. 4288C>G   | rs80357466   | Pathogenic | Uncertain significance |
| 4640 | c. 4288C>T   | rs80357466   | Benign     | Uncertain significance |
| 4641 | c. 4286A>G   | rs876659228  | Pathogenic | Uncertain significance |
| 4642 | c. 4273C>T   | rs768327850  | Benign     | Uncertain significance |
| 4643 | c. 4273C>G   | rs768327850  | Benign     | Uncertain significance |



|      |            |              |            |                        |
|------|------------|--------------|------------|------------------------|
| 4644 | c. 4272G>C | rs398122684  | Benign     | Uncertain significance |
| 4645 | c. 4271A>G | rs1555584133 | Pathogenic | Uncertain significance |
| 4646 | c. 4268G>T | rs876660129  | Benign     | Uncertain significance |
| 4647 | c. 4265G>A | rs747364414  | Pathogenic | Uncertain significance |
| 4648 | c. 4262A>T | rs80357079   | Benign     | Uncertain significance |
| 4649 | c. 4260G>T | rs1567783343 | Benign     | Uncertain significance |
| 4650 | c. 4258C>G | rs80357305   | Benign     | Uncertain significance |
| 4651 | c. 4254A>T | rs1555584157 | Pathogenic | Uncertain significance |
| 4652 | c. 4253T>C | rs397509157  | Benign     | Uncertain significance |
| 4653 | c. 4249G>A | rs1029805420 | Pathogenic | Uncertain significance |
| 4654 | c. 4247C>G |              | Benign     | Uncertain significance |
| 4655 | c. 4246G>A | rs370999077  | Pathogenic | Uncertain significance |
| 4656 | c. 4243G>C | rs1057519558 | Benign     | Uncertain significance |
| 4657 | c. 4243G>A | rs1057519558 | Pathogenic | Uncertain significance |
| 4658 | c. 4241T>G | rs878854951  | Benign     | Uncertain significance |
| 4659 | c. 4241T>C | rs878854951  | Benign     | Uncertain significance |
| 4660 | c. 4237G>A |              | Pathogenic | Uncertain significance |
| 4661 | c. 4234G>C |              | Benign     | Uncertain significance |
| 4662 | c. 4234G>A | rs765183110  | Benign     | Uncertain significance |
| 4663 | c. 4234G>T | rs765183110  | Benign     | Uncertain significance |
| 4664 | c. 4233G>A | rs1567783458 | Pathogenic | Uncertain significance |
| 4665 | c. 4231A>G | rs587781768  | Benign     | Uncertain significance |
| 4666 | c. 4223A>C | rs1555584227 | Benign     | Uncertain significance |
| 4667 | c. 4223A>G | rs1555584227 | Pathogenic | Uncertain significance |
| 4668 | c. 4220T>G | rs80357492   | Benign     | Uncertain significance |
| 4669 | c. 4220T>C | rs80357492   | Benign     | Uncertain significance |
| 4670 | c. 4219C>G | rs397507227  | Benign     | Uncertain significance |
| 4671 | c. 4211T>G | rs80356916   | Benign     | Uncertain significance |
| 4672 | c. 4211T>C | rs80356916   | Benign     | Uncertain significance |
| 4673 | c. 4205A>C | rs80356882   | Benign     | Uncertain significance |
| 4674 | c. 4205A>G | rs80356882   | Benign     | Uncertain significance |
| 4675 | c. 4200G>C |              | Benign     | Uncertain significance |
| 4676 | c. 4199T>A |              | Benign     | Uncertain significance |
| 4677 | c. 4199T>C | rs80357473   | Benign     | Uncertain significance |
| 4678 | c. 4198A>G | rs80357306   | Benign     | Uncertain significance |
| 4679 | c. 4196C>G | rs876658465  | Benign     | Uncertain significance |
| 4680 | c. 4193A>G | rs761640584  | Benign     | Uncertain significance |
| 4681 | c. 4192G>A |              | Benign     | Uncertain significance |
| 4682 | c. 4192G>T | rs876660331  | Pathogenic | Uncertain significance |
| 4683 | c. 4190G>A | rs767421571  | Pathogenic | Uncertain significance |
| 4684 | c. 4189A>C | rs886037792  | Benign     | Uncertain significance |
| 4685 | c. 4186C>A | rs80357011   | Benign     | Uncertain significance |
| 4686 | c. 4180A>C | rs1555586062 | Benign     | Uncertain significance |
| 4687 | c. 4178C>G | rs1555586071 | Benign     | Uncertain significance |
| 4688 | c. 4177A>G | rs587782870  | Benign     | Uncertain significance |
| 4689 | c. 4175T>C | rs778319854  | Benign     | Uncertain significance |
| 4690 | c. 4172T>G | rs397509146  | Benign     | Uncertain significance |
| 4691 | c. 4171A>G |              | Benign     | Uncertain significance |
| 4692 | c. 4169A>G | rs1165149350 | Benign     | Uncertain significance |
| 4693 | c. 4168G>A | rs752300203  | Pathogenic | Uncertain significance |
| 4694 | c. 4159T>C | rs876658221  | Benign     | Uncertain significance |
| 4695 | c. 4154T>C |              | Benign     | Uncertain significance |
| 4696 | c. 4151G>A | rs786203545  | Benign     | Uncertain significance |
| 4697 | c. 4150G>A | rs1555586146 | Pathogenic | Uncertain significance |

|      |              |              |            |                        |
|------|--------------|--------------|------------|------------------------|
| 4698 | c. 4148C>T   | rs80357071   | Benign     | Uncertain significance |
| 4699 | c. 4144T>A   | rs786202106  | Benign     | Uncertain significance |
| 4700 | c. 4143C>G   | rs1567788391 | Benign     | Uncertain significance |
| 4701 | c. 4133T>C   | rs1567788422 | Benign     | Uncertain significance |
| 4702 | c. 4132G>T   | rs28897690   | Benign     | Uncertain significance |
| 4703 | c. 4131C>A   | rs80356871   | Benign     | Uncertain significance |
| 4704 | c. 4130G>A   | rs1567788442 | Pathogenic | Uncertain significance |
| 4705 | c. 4129A>G   | rs730881491  | Benign     | Uncertain significance |
| 4706 | c. 4126A>G   |              | Benign     | Uncertain significance |
| 4707 | c. 4123G>A   | rs80357397   | Pathogenic | Uncertain significance |
| 4708 | c. 4122T>A   | rs1555586200 | Benign     | Uncertain significance |
| 4709 | c. 4121G>A   | rs1382449149 | Pathogenic | Uncertain significance |
| 4710 | c. 4111G>A   | rs774593602  | Pathogenic | Uncertain significance |
| 4711 | c. 4105G>C   |              | Benign     | Uncertain significance |
| 4712 | c. 4103C>T   |              | Benign     | Uncertain significance |
| 4713 | c. 4102G>A   | rs1064796463 | Pathogenic | Uncertain significance |
| 4714 | c. 4099G>A   | rs786202998  | Pathogenic | Uncertain significance |
| 4715 | c. 4097G>A   | rs876660948  | Pathogenic | Uncertain significance |
| 4716 | c. 4096+1G>T |              | Pathogenic | Uncertain significance |
| 4717 | c. 4096G>C   | rs431825405  | Benign     | Uncertain significance |
| 4718 | c. 4096G>A   | rs431825405  | Pathogenic | Uncertain significance |
| 4719 | c. 4088C>T   | rs398122680  | Benign     | Uncertain significance |
| 4720 | c. 4085A>T   |              | Benign     | Uncertain significance |
| 4721 | c. 4084G>A   | rs775463394  | Pathogenic | Uncertain significance |
| 4722 | c. 4083G>A   | rs374192364  | Pathogenic | Uncertain significance |
| 4723 | c. 4082T>C   |              | Benign     | Uncertain significance |
| 4724 | c. 4075C>A   |              | Benign     | Uncertain significance |
| 4725 | c. 4075C>G   | rs80357456   | Benign     | Uncertain significance |
| 4726 | c. 4073A>G   | rs397507225  | Pathogenic | Uncertain significance |
| 4727 | c. 4072G>A   | rs397509136  | Pathogenic | Uncertain significance |
| 4728 | c. 4071A>T   | rs786201475  | Pathogenic | Uncertain significance |
| 4729 | c. 4069G>C   |              | Benign     | Uncertain significance |
| 4730 | c. 4064A>G   | rs1567789081 | Benign     | Uncertain significance |
| 4731 | c. 4063A>G   | rs876660530  | Pathogenic | Uncertain significance |
| 4732 | c. 4061A>G   | rs767246037  | Benign     | Uncertain significance |
| 4733 | c. 4057G>A   |              | Pathogenic | Uncertain significance |
| 4734 | c. 4055A>T   | rs879254228  | Pathogenic | Uncertain significance |
| 4735 | c. 4054G>C   | rs80357202   | Benign     | Uncertain significance |
| 4736 | c. 4054G>A   | rs80357202   | Pathogenic | Uncertain significance |
| 4737 | c. 4049G>T   | rs1433564897 | Benign     | Uncertain significance |
| 4738 | c. 4048G>C   | rs748674194  | Benign     | Uncertain significance |
| 4739 | c. 4048G>T   | rs748674194  | Benign     | Uncertain significance |
| 4740 | c. 4046C>G   | rs80357345   | Benign     | Uncertain significance |
| 4741 | c. 4045A>G   | rs80357231   | Benign     | Uncertain significance |
| 4742 | c. 4045A>C   | rs80357231   | Benign     | Uncertain significance |
| 4743 | c. 4040G>A   | rs80357210   | Pathogenic | Uncertain significance |
| 4744 | c. 4034A>T   |              | Pathogenic | Uncertain significance |
| 4745 | c. 4031A>G   | rs55639854   | Benign     | Uncertain significance |
| 4746 | c. 4028A>T   | rs775339017  | Benign     | Uncertain significance |
| 4747 | c. 4027G>T   | rs1160287128 | Pathogenic | Uncertain significance |
| 4748 | c. 4021G>A   | rs762908108  | Pathogenic | Uncertain significance |
| 4749 | c. 4020G>T   | rs1555586637 | Benign     | Uncertain significance |
| 4750 | c. 4016A>G   | rs886039313  | Benign     | Uncertain significance |
| 4751 | c. 4015G>A   | rs80357021   | Benign     | Uncertain significance |

|      |            |              |            |                        |
|------|------------|--------------|------------|------------------------|
| 4752 | c. 4013A>G | rs1555586661 | Benign     | Uncertain significance |
| 4753 | c. 4011C>G | rs80356886   | Benign     | Uncertain significance |
| 4754 | c. 4009G>C | rs886041144  | Benign     | Uncertain significance |
| 4755 | c. 4006A>T | rs976725810  | Pathogenic | Uncertain significance |
| 4756 | c. 3998T>C | rs1135401872 | Benign     | Uncertain significance |
| 4757 | c. 3996A>G | rs1567789328 | Pathogenic | Uncertain significance |
| 4758 | c. 3995G>T | rs730881490  | Pathogenic | Uncertain significance |
| 4759 | c. 3992A>G | rs1060502363 | Pathogenic | Uncertain significance |
| 4760 | c. 3988A>T | rs1555586688 | Pathogenic | Uncertain significance |
| 4761 | c. 3985G>A | rs876659467  | Pathogenic | Uncertain significance |
| 4762 | c. 3980A>G | rs730881444  | Pathogenic | Uncertain significance |
| 4763 | c. 3979C>G |              | Pathogenic | Uncertain significance |
| 4764 | c. 3976C>T | rs1567789376 | Benign     | Uncertain significance |
| 4765 | c. 3974G>A | rs921253348  | Pathogenic | Uncertain significance |
| 4766 | c. 3971T>C |              | Benign     | Uncertain significance |
| 4767 | c. 3970A>T | rs587782241  | Benign     | Uncertain significance |
| 4768 | c. 3969A>T | rs876660410  | Pathogenic | Uncertain significance |
| 4769 | c. 3965A>G | rs80357042   | Benign     | Uncertain significance |
| 4770 | c. 3965A>C | rs80357042   | Benign     | Uncertain significance |
| 4771 | c. 3965A>T | rs80357042   | Pathogenic | Uncertain significance |
| 4772 | c. 3964A>G | rs80357343   | Benign     | Uncertain significance |
| 4773 | c. 3964A>C | rs80357343   | Benign     | Uncertain significance |
| 4774 | c. 3962C>A | rs386833394  | Benign     | Uncertain significance |
| 4775 | c. 3962C>G | rs386833394  | Benign     | Uncertain significance |
| 4776 | c. 3955G>A | rs431825403  | Pathogenic | Uncertain significance |
| 4777 | c. 3953T>C | rs1388475291 | Benign     | Uncertain significance |
| 4778 | c. 3952A>G | rs397509121  | Benign     | Uncertain significance |
| 4779 | c. 3944C>A | rs80357500   | Benign     | Uncertain significance |
| 4780 | c. 3941A>T | rs759916956  | Benign     | Uncertain significance |
| 4781 | c. 3940G>A | rs80356954   | Benign     | Uncertain significance |
| 4782 | c. 3938A>G | rs765729710  | Pathogenic | Uncertain significance |
| 4783 | c. 3933C>A |              | Benign     | Uncertain significance |
| 4784 | c. 3931A>G | rs864622233  | Benign     | Uncertain significance |
| 4785 | c. 3929C>T | rs80357257   | Benign     | Uncertain significance |
| 4786 | c. 3929C>G | rs80357257   | Benign     | Uncertain significance |
| 4787 | c. 3918G>C | rs786202068  | Benign     | Uncertain significance |
| 4788 | c. 3914A>T | rs431825402  | Pathogenic | Uncertain significance |
| 4789 | c. 3913G>C | rs1555586799 | Benign     | Uncertain significance |
| 4790 | c. 3906A>T | rs1567789643 | Pathogenic | Uncertain significance |
| 4791 | c. 3904G>A | rs80357461   | Pathogenic | Uncertain significance |
| 4792 | c. 3903T>A | rs273900719  | Benign     | Uncertain significance |
| 4793 | c. 3902G>A | rs1057519496 | Pathogenic | Uncertain significance |
| 4794 | c. 3901A>T | rs786203580  | Pathogenic | Uncertain significance |
| 4795 | c. 3901A>G | rs786203580  | Pathogenic | Uncertain significance |
| 4796 | c. 3897G>T | rs398122678  | Benign     | Uncertain significance |
| 4797 | c. 3896A>G | rs876660866  | Pathogenic | Uncertain significance |
| 4798 | c. 3893C>T | rs80357440   | Benign     | Uncertain significance |
| 4799 | c. 3892T>A |              | Benign     | Uncertain significance |
| 4800 | c. 3889T>A | rs1450793674 | Benign     | Uncertain significance |
| 4801 | c. 3889T>C | rs1450793674 | Benign     | Uncertain significance |
| 4802 | c. 3887T>G | rs1555586855 | Benign     | Uncertain significance |
| 4803 | c. 3886T>C |              | Benign     | Uncertain significance |
| 4804 | c. 3881G>T |              | Benign     | Uncertain significance |
| 4805 | c. 3878C>T | rs80357213   | Benign     | Uncertain significance |

|      |            |              |            |                        |
|------|------------|--------------|------------|------------------------|
| 4806 | c. 3878C>A | rs80357213   | Benign     | Uncertain significance |
| 4807 | c. 3877G>C | rs397507223  | Benign     | Uncertain significance |
| 4808 | c. 3875C>G | rs876658340  | Pathogenic | Uncertain significance |
| 4809 | c. 3875C>A | rs876658340  | Pathogenic | Uncertain significance |
| 4810 | c. 3874T>C | rs786203823  | Benign     | Uncertain significance |
| 4811 | c. 3869A>C | rs431825401  | Benign     | Uncertain significance |
| 4812 | c. 3868A>G | rs80357254   | Benign     | Uncertain significance |
| 4813 | c. 3865A>C | rs1064795449 | Benign     | Uncertain significance |
| 4814 | c. 3862G>C | rs876659708  | Benign     | Uncertain significance |
| 4815 | c. 3859G>A | rs1555586934 | Pathogenic | Uncertain significance |
| 4816 | c. 3857G>C | rs142383077  | Benign     | Uncertain significance |
| 4817 | c. 3852C>A |              | Benign     | Uncertain significance |
| 4818 | c. 3851A>T |              | Benign     | Uncertain significance |
| 4819 | c. 3851A>G | rs80357499   | Pathogenic | Uncertain significance |
| 4820 | c. 3847C>T | rs1555586946 | Benign     | Uncertain significance |
| 4821 | c. 3843G>T |              | Benign     | Uncertain significance |
| 4822 | c. 3842A>G |              | Pathogenic | Uncertain significance |
| 4823 | c. 3842A>C | rs80357483   | Pathogenic | Uncertain significance |
| 4824 | c. 3841C>G | rs80356866   | Pathogenic | Uncertain significance |
| 4825 | c. 3839C>A |              | Pathogenic | Uncertain significance |
| 4826 | c. 3838T>C | rs1567789887 | Benign     | Uncertain significance |
| 4827 | c. 3835G>C | rs80357036   | Benign     | Uncertain significance |
| 4828 | c. 3835G>T | rs80357036   | Benign     | Uncertain significance |
| 4829 | c. 3831A>G | rs1567789910 | Benign     | Uncertain significance |
| 4830 | c. 3830C>T | rs730881489  | Pathogenic | Uncertain significance |
| 4831 | c. 3824T>A |              | Benign     | Uncertain significance |
| 4832 | c. 3820G>C |              | Pathogenic | Uncertain significance |
| 4833 | c. 3819G>C |              | Benign     | Uncertain significance |
| 4834 | c. 3818A>T |              | Pathogenic | Uncertain significance |
| 4835 | c. 3816C>A | rs786201893  | Benign     | Uncertain significance |
| 4836 | c. 3812G>C | rs1567789989 | Benign     | Uncertain significance |
| 4837 | c. 3809G>A | rs1207787135 | Pathogenic | Uncertain significance |
| 4838 | c. 3807C>G | rs786202569  | Benign     | Uncertain significance |
| 4839 | c. 3804T>G | rs140588714  | Benign     | Uncertain significance |
| 4840 | c. 3803A>G | rs273900716  | Benign     | Uncertain significance |
| 4841 | c. 3800T>C | rs587782190  | Benign     | Uncertain significance |
| 4842 | c. 3798C>A | rs200648498  | Benign     | Uncertain significance |
| 4843 | c. 3798C>G | rs200648498  | Benign     | Uncertain significance |
| 4844 | c. 3797G>T | rs80357160   | Benign     | Uncertain significance |
| 4845 | c. 3793A>C | rs1060502364 | Benign     | Uncertain significance |
| 4846 | c. 3792G>C |              | Benign     | Uncertain significance |
| 4847 | c. 3791A>G | rs1555587039 | Benign     | Uncertain significance |
| 4848 | c. 3785C>T | rs80357269   | Benign     | Uncertain significance |
| 4849 | c. 3784T>C | rs1011096937 | Benign     | Uncertain significance |
| 4850 | c. 3783A>T | rs80356831   | Benign     | Uncertain significance |
| 4851 | c. 3782T>C | rs397507219  | Benign     | Uncertain significance |
| 4852 | c. 3778T>G | rs1555587079 | Benign     | Uncertain significance |
| 4853 | c. 3775A>G |              | Benign     | Uncertain significance |
| 4854 | c. 3774G>T | rs431825399  | Pathogenic | Uncertain significance |
| 4855 | c. 3772G>A | rs397509105  | Pathogenic | Uncertain significance |
| 4856 | c. 3770A>G |              | Pathogenic | Uncertain significance |
| 4857 | c. 3769G>A | rs1567790183 | Pathogenic | Uncertain significance |
| 4858 | c. 3760A>G | rs80357362   | Pathogenic | Uncertain significance |
| 4859 | c. 3758C>G | rs397509100  | Benign     | Uncertain significance |



|      |            |              |            |                        |
|------|------------|--------------|------------|------------------------|
| 4860 | c. 3755T>C | rs1555587147 | Benign     | Uncertain significance |
| 4861 | c. 3753T>G | rs397509098  | Benign     | Uncertain significance |
| 4862 | c. 3752G>A | rs879254079  | Pathogenic | Uncertain significance |
| 4863 | c. 3750G>T | rs145903082  | Benign     | Uncertain significance |
| 4864 | c. 3746C>G | rs80357099   | Benign     | Uncertain significance |
| 4865 | c. 3745A>G | rs1555587189 | Pathogenic | Uncertain significance |
| 4866 | c. 3740T>C |              | Benign     | Uncertain significance |
| 4867 | c. 3737C>T |              | Benign     | Uncertain significance |
| 4868 | c. 3736A>G | rs587776488  | Benign     | Uncertain significance |
| 4869 | c. 3734G>A | rs1060502348 | Pathogenic | Uncertain significance |
| 4870 | c. 3728G>A |              | Pathogenic | Uncertain significance |
| 4871 | c. 3720G>C | rs876658341  | Benign     | Uncertain significance |
| 4872 | c. 3713C>G | rs28897688   | Benign     | Uncertain significance |
| 4873 | c. 3710T>C | rs876660883  | Benign     | Uncertain significance |
| 4874 | c. 3706A>G | rs1567790509 | Benign     | Uncertain significance |
| 4875 | c. 3700G>C | rs763354142  | Benign     | Uncertain significance |
| 4876 | c. 3698A>G | rs80357141   | Benign     | Uncertain significance |
| 4877 | c. 3688T>A |              | Benign     | Uncertain significance |
| 4878 | c. 3682C>T | rs1567790599 | Benign     | Uncertain significance |
| 4879 | c. 3681A>T | rs730881488  | Benign     | Uncertain significance |
| 4880 | c. 3674G>C | rs1567790638 | Benign     | Uncertain significance |
| 4881 | c. 3673T>G | rs1382025345 | Benign     | Uncertain significance |
| 4882 | c. 3667C>T | rs1555587309 | Benign     | Uncertain significance |
| 4883 | c. 3666G>C | rs1555587312 | Benign     | Uncertain significance |
| 4884 | c. 3662A>C | rs273900713  | Benign     | Uncertain significance |
| 4885 | c. 3659A>T | rs766572561  | Benign     | Uncertain significance |
| 4886 | c. 3655G>A | rs80356921   | Pathogenic | Uncertain significance |
| 4887 | c. 3652A>T | rs80356894   | Pathogenic | Uncertain significance |
| 4888 | c. 3652A>G | rs80356894   | Pathogenic | Uncertain significance |
| 4889 | c. 3650C>G | rs398122676  | Benign     | Uncertain significance |
| 4890 | c. 3649T>C | rs273900712  | Benign     | Uncertain significance |
| 4891 | c. 3644A>G | rs786203310  | Benign     | Uncertain significance |
| 4892 | c. 3642G>C | rs398122675  | Benign     | Uncertain significance |
| 4893 | c. 3642G>T | rs398122675  | Pathogenic | Uncertain significance |
| 4894 | c. 3634T>C |              | Benign     | Uncertain significance |
| 4895 | c. 3632C>G | rs1555587377 | Pathogenic | Uncertain significance |
| 4896 | c. 3629A>G | rs1060502347 | Pathogenic | Uncertain significance |
| 4897 | c. 3625T>G | rs273900711  | Benign     | Uncertain significance |
| 4898 | c. 3622A>G | rs80357152   | Benign     | Uncertain significance |
| 4899 | c. 3620A>T | rs1555587402 | Pathogenic | Uncertain significance |
| 4900 | c. 3619A>G | rs80357455   | Benign     | Uncertain significance |
| 4901 | c. 3616G>T | rs1555587407 | Pathogenic | Uncertain significance |
| 4902 | c. 3614G>T |              | Benign     | Uncertain significance |
| 4903 | c. 3613G>A | rs80357294   | Pathogenic | Uncertain significance |
| 4904 | c. 3611G>C | rs1456509049 | Benign     | Uncertain significance |
| 4905 | c. 3607C>G | rs62625308   | Benign     | Uncertain significance |
| 4906 | c. 3602G>A | rs1567790971 | Pathogenic | Uncertain significance |
| 4907 | c. 3601G>C | rs55725337   | Pathogenic | Uncertain significance |
| 4908 | c. 3595G>T | rs1555587437 | Benign     | Uncertain significance |
| 4909 | c. 3587C>T | rs80356944   | Benign     | Uncertain significance |
| 4910 | c. 3587C>A | rs80356944   | Benign     | Uncertain significance |
| 4911 | c. 3586A>T | rs1340335862 | Benign     | Uncertain significance |
| 4912 | c. 3584A>G | rs28897685   | Benign     | Uncertain significance |
| 4913 | c. 3583C>G | rs876659903  | Benign     | Uncertain significance |

|      |            |              |            |                        |
|------|------------|--------------|------------|------------------------|
| 4914 | c. 3583C>T | rs876659903  | Benign     | Uncertain significance |
| 4915 | c. 3581C>T | rs80357290   | Benign     | Uncertain significance |
| 4916 | c. 3580A>G | rs369982706  | Pathogenic | Uncertain significance |
| 4917 | c. 3572G>A | rs878854948  | Pathogenic | Uncertain significance |
| 4918 | c. 3569C>T | rs755209182  | Benign     | Uncertain significance |
| 4919 | c. 3565A>T | rs1567791142 | Pathogenic | Uncertain significance |
| 4920 | c. 3564G>C | rs879255484  | Benign     | Uncertain significance |
| 4921 | c. 3560G>C | rs80356975   | Benign     | Uncertain significance |
| 4922 | c. 3557T>A | rs1567791164 | Pathogenic | Uncertain significance |
| 4923 | c. 3556C>T | rs1555587505 | Benign     | Uncertain significance |
| 4924 | c. 3555G>T | rs587779368  | Benign     | Uncertain significance |
| 4925 | c. 3548A>T | rs16942      | Pathogenic | Uncertain significance |
| 4926 | c. 3545A>T | rs1555587532 | Pathogenic | Uncertain significance |
| 4927 | c. 3542T>G |              | Benign     | Uncertain significance |
| 4928 | c. 3542T>C | rs80357032   | Benign     | Uncertain significance |
| 4929 | c. 3541G>T |              | Benign     | Uncertain significance |
| 4930 | c. 3540C>G |              | Benign     | Uncertain significance |
| 4931 | c. 3539G>A | rs1064793057 | Pathogenic | Uncertain significance |
| 4932 | c. 3535A>C | rs587782188  | Benign     | Uncertain significance |
| 4933 | c. 3533G>C | rs1294360179 | Benign     | Uncertain significance |
| 4934 | c. 3533G>A | rs1294360179 | Pathogenic | Uncertain significance |
| 4935 | c. 3532A>G | rs1567791298 | Pathogenic | Uncertain significance |
| 4936 | c. 3527T>A | rs80357027   | Benign     | Uncertain significance |
| 4937 | c. 3526G>A | rs777796838  | Pathogenic | Uncertain significance |
| 4938 | c. 3524C>T | rs1567791322 | Benign     | Uncertain significance |
| 4939 | c. 3523G>A |              | Pathogenic | Uncertain significance |
| 4940 | c. 3521C>G |              | Pathogenic | Uncertain significance |
| 4941 | c. 3518G>T |              | Benign     | Uncertain significance |
| 4942 | c. 3518G>A | rs746949187  | Benign     | Uncertain significance |
| 4943 | c. 3515A>G | rs80357206   | Benign     | Uncertain significance |
| 4944 | c. 3511A>G | rs730882164  | Pathogenic | Uncertain significance |
| 4945 | c. 3510T>G |              | Pathogenic | Uncertain significance |
| 4946 | c. 3508A>G | rs273899708  | Benign     | Uncertain significance |
| 4947 | c. 3508A>T | rs273899708  | Benign     | Uncertain significance |
| 4948 | c. 3506A>G | rs1323940169 | Benign     | Uncertain significance |
| 4949 | c. 3505G>A |              | Pathogenic | Uncertain significance |
| 4950 | c. 3505G>T | rs876659269  | Pathogenic | Uncertain significance |
| 4951 | c. 3504T>G | rs1458197554 | Benign     | Uncertain significance |
| 4952 | c. 3496G>C | rs745418679  | Benign     | Uncertain significance |
| 4953 | c. 3491G>T | rs397509075  | Benign     | Uncertain significance |
| 4954 | c. 3488C>T | rs80356918   | Benign     | Uncertain significance |
| 4955 | c. 3487A>G | rs769456095  | Pathogenic | Uncertain significance |
| 4956 | c. 3484G>T | rs1555587619 | Pathogenic | Uncertain significance |
| 4957 | c. 3481G>A |              | Benign     | Uncertain significance |
| 4958 | c. 3479A>C |              | Benign     | Uncertain significance |
| 4959 | c. 3476T>A | rs1567791496 | Benign     | Uncertain significance |
| 4960 | c. 3475A>G | rs876658318  | Benign     | Uncertain significance |
| 4961 | c. 3472G>A |              | Pathogenic | Uncertain significance |
| 4962 | c. 3470G>C | rs876659133  | Benign     | Uncertain significance |
| 4963 | c. 3466G>A | rs1064793302 | Pathogenic | Uncertain significance |
| 4964 | c. 3460T>A | rs1567791553 | Benign     | Uncertain significance |
| 4965 | c. 3458T>C |              | Benign     | Uncertain significance |
| 4966 | c. 3457C>G | rs1555587658 | Benign     | Uncertain significance |
| 4967 | c. 3454G>C | rs80357175   | Benign     | Uncertain significance |



|      |            |              |            |                        |
|------|------------|--------------|------------|------------------------|
| 4968 | c. 3449C>T | rs587782752  | Benign     | Uncertain significance |
| 4969 | c. 3440C>A | rs876660757  | Pathogenic | Uncertain significance |
| 4970 | c. 3437G>A | rs80357247   | Pathogenic | Uncertain significance |
| 4971 | c. 3437G>C | rs80357247   | Benign     | Uncertain significance |
| 4972 | c. 3436T>G | rs1567791612 | Benign     | Uncertain significance |
| 4973 | c. 3433G>A | rs431825396  | Benign     | Uncertain significance |
| 4974 | c. 3433G>T | rs431825396  | Pathogenic | Uncertain significance |
| 4975 | c. 3432G>T | rs80356922   | Benign     | Uncertain significance |
| 4976 | c. 3428C>G | rs80357434   | Pathogenic | Uncertain significance |
| 4977 | c. 3428C>T | rs80357434   | Benign     | Uncertain significance |
| 4978 | c. 3425C>T | rs1555587711 | Benign     | Uncertain significance |
| 4979 | c. 3424G>T | rs80357101   | Benign     | Uncertain significance |
| 4980 | c. 3424G>C | rs80357101   | Benign     | Uncertain significance |
| 4981 | c. 3421C>T | rs1555587727 | Benign     | Uncertain significance |
| 4982 | c. 3419G>A |              | Pathogenic | Uncertain significance |
| 4983 | c. 3418A>C | rs2227945    | Benign     | Uncertain significance |
| 4984 | c. 3415A>C | rs587781765  | Benign     | Uncertain significance |
| 4985 | c. 3411G>A | rs786202900  | Pathogenic | Uncertain significance |
| 4986 | c. 3409A>G | rs771479616  | Pathogenic | Uncertain significance |
| 4987 | c. 3407C>G | rs80357329   | Benign     | Uncertain significance |
| 4988 | c. 3406C>T |              | Benign     | Uncertain significance |
| 4989 | c. 3406C>A | rs431825395  | Benign     | Uncertain significance |
| 4990 | c. 3403C>G | rs80357136   | Benign     | Uncertain significance |
| 4991 | c. 3401A>T | rs762744684  | Pathogenic | Uncertain significance |
| 4992 | c. 3400G>A | rs80357018   | Pathogenic | Uncertain significance |
| 4993 | c. 3398T>C | rs80356971   | Benign     | Uncertain significance |
| 4994 | c. 3394A>G | rs530464947  | Pathogenic | Uncertain significance |
| 4995 | c. 3392A>T | rs1555587813 | Benign     | Uncertain significance |
| 4996 | c. 3392A>G | rs1555587813 | Benign     | Uncertain significance |
| 4997 | c. 3391G>A | rs1555587816 | Pathogenic | Uncertain significance |
| 4998 | c. 3386T>C | rs1567791871 | Benign     | Uncertain significance |
| 4999 | c. 3385A>G |              | Benign     | Uncertain significance |
| 5000 | c. 3383T>C | rs1555587827 | Benign     | Uncertain significance |
| 5001 | c. 3379T>C | rs1451089848 | Benign     | Uncertain significance |
| 5002 | c. 3377C>T | rs80356887   | Benign     | Uncertain significance |
| 5003 | c. 3374C>A | rs1555587835 | Pathogenic | Uncertain significance |
| 5004 | c. 3373T>C | rs1555587839 | Benign     | Uncertain significance |
| 5005 | c. 3368A>T | rs1555587851 | Pathogenic | Uncertain significance |
| 5006 | c. 3366A>C | rs1567791947 | Benign     | Uncertain significance |
| 5007 | c. 3361A>G | rs876660526  | Pathogenic | Uncertain significance |
| 5008 | c. 3361A>C | rs876660526  | Benign     | Uncertain significance |
| 5009 | c. 3359T>A | rs1361427704 | Benign     | Uncertain significance |
| 5010 | c. 3358G>C |              | Benign     | Uncertain significance |
| 5011 | c. 3358G>A | rs748894760  | Pathogenic | Uncertain significance |
| 5012 | c. 3356C>G | rs863224759  | Benign     | Uncertain significance |
| 5013 | c. 3354G>T | rs80357334   | Pathogenic | Uncertain significance |
| 5014 | c. 3347T>G | rs786203153  | Benign     | Uncertain significance |
| 5015 | c. 3345A>C | rs876658243  | Benign     | Uncertain significance |
| 5016 | c. 3344A>T | rs1555587933 | Pathogenic | Uncertain significance |
| 5017 | c. 3338A>G |              | Pathogenic | Uncertain significance |
| 5018 | c. 3331C>G |              | Benign     | Uncertain significance |
| 5019 | c. 3320A>G |              | Benign     | Uncertain significance |
| 5020 | c. 3316C>T | rs45599040   | Benign     | Uncertain significance |
| 5021 | c. 3315T>A |              | Benign     | Uncertain significance |

|      |            |              |            |                        |
|------|------------|--------------|------------|------------------------|
| 5022 | c. 3313C>A | rs80357288   | Benign     | Uncertain significance |
| 5023 | c. 3312G>C |              | Benign     | Uncertain significance |
| 5024 | c. 3309T>C | rs80357317   | Benign     | Uncertain significance |
| 5025 | c. 3308G>A | rs80357135   | Pathogenic | Uncertain significance |
| 5026 | c. 3308G>T | rs80357135   | Benign     | Uncertain significance |
| 5027 | c. 3305A>G | rs80356900   | Benign     | Uncertain significance |
| 5028 | c. 3301A>G |              | Benign     | Uncertain significance |
| 5029 | c. 3298G>A | rs1555587999 | Pathogenic | Uncertain significance |
| 5030 | c. 3292C>T | rs879255291  | Benign     | Uncertain significance |
| 5031 | c. 3289A>C |              | Benign     | Uncertain significance |
| 5032 | c. 3289A>T | rs587782864  | Pathogenic | Uncertain significance |
| 5033 | c. 3288A>G |              | Benign     | Uncertain significance |
| 5034 | c. 3287A>G | rs273899704  | Benign     | Uncertain significance |
| 5035 | c. 3286C>A | rs80357485   | Benign     | Uncertain significance |
| 5036 | c. 3281A>G |              | Pathogenic | Uncertain significance |
| 5037 | c. 3280T>G |              | Benign     | Uncertain significance |
| 5038 | c. 3280T>C | rs1555588026 | Benign     | Uncertain significance |
| 5039 | c. 3277G>T | rs587778117  | Pathogenic | Uncertain significance |
| 5040 | c. 3276G>T | rs764458412  | Benign     | Uncertain significance |
| 5041 | c. 3274G>A | rs876658360  | Pathogenic | Uncertain significance |
| 5042 | c. 3272C>T |              | Benign     | Uncertain significance |
| 5043 | c. 3269A>G | rs1555588045 | Benign     | Uncertain significance |
| 5044 | c. 3267G>T | rs767544239  | Benign     | Uncertain significance |
| 5045 | c. 3263T>A | rs80356901   | Benign     | Uncertain significance |
| 5046 | c. 3260G>C | rs80357172   | Pathogenic | Uncertain significance |
| 5047 | c. 3257T>C | rs80357006   | Benign     | Uncertain significance |
| 5048 | c. 3250C>A | rs879254009  | Benign     | Uncertain significance |
| 5049 | c. 3248T>C | rs786203958  | Benign     | Uncertain significance |
| 5050 | c. 3247A>C | rs397507213  | Benign     | Uncertain significance |
| 5051 | c. 3245C>T | rs1555588115 | Benign     | Uncertain significance |
| 5052 | c. 3244G>T |              | Benign     | Uncertain significance |
| 5053 | c. 3244G>A | rs779459487  | Pathogenic | Uncertain significance |
| 5054 | c. 3242A>G |              | Benign     | Uncertain significance |
| 5055 | c. 3241A>G | rs876659928  | Benign     | Uncertain significance |
| 5056 | c. 3238T>G | rs754597283  | Benign     | Uncertain significance |
| 5057 | c. 3230G>A | rs1567792424 | Benign     | Uncertain significance |
| 5058 | c. 3227G>T | rs80357313   | Pathogenic | Uncertain significance |
| 5059 | c. 3227G>C | rs80357313   | Benign     | Uncertain significance |
| 5060 | c. 3225C>G | rs778607600  | Benign     | Uncertain significance |
| 5061 | c. 3223A>G | rs1567792459 | Benign     | Uncertain significance |
| 5062 | c. 3221G>C | rs786202155  | Benign     | Uncertain significance |
| 5063 | c. 3220A>G | rs80357263   | Pathogenic | Uncertain significance |
| 5064 | c. 3218G>A | rs757632961  | Pathogenic | Uncertain significance |
| 5065 | c. 3217G>A | rs878854945  | Pathogenic | Uncertain significance |
| 5066 | c. 3209C>G | rs397507212  | Benign     | Uncertain significance |
| 5067 | c. 3207A>T | rs1567792523 | Pathogenic | Uncertain significance |
| 5068 | c. 3206A>T | rs879254151  | Pathogenic | Uncertain significance |
| 5069 | c. 3200A>G | rs1555588214 | Benign     | Uncertain significance |
| 5070 | c. 3199A>T |              | Pathogenic | Uncertain significance |
| 5071 | c. 3196G>A |              | Pathogenic | Uncertain significance |
| 5072 | c. 3195T>G | rs1567792553 | Benign     | Uncertain significance |
| 5073 | c. 3194A>T | rs1555588228 | Benign     | Uncertain significance |
| 5074 | c. 3190A>T | rs273899702  | Pathogenic | Uncertain significance |
| 5075 | c. 3185G>T | rs397507211  | Pathogenic | Uncertain significance |

|      |            |              |            |                        |
|------|------------|--------------|------------|------------------------|
| 5076 | c. 3184G>A | rs1567792594 | Pathogenic | Uncertain significance |
| 5077 | c. 3182T>C |              | Benign     | Uncertain significance |
| 5078 | c. 3181A>C | rs876658975  | Benign     | Uncertain significance |
| 5079 | c. 3178G>C | rs80357424   | Benign     | Uncertain significance |
| 5080 | c. 3173T>G | rs1555588264 | Benign     | Uncertain significance |
| 5081 | c. 3172A>G | rs1064795478 | Pathogenic | Uncertain significance |
| 5082 | c. 3170G>C |              | Benign     | Uncertain significance |
| 5083 | c. 3170G>A | rs587776487  | Pathogenic | Uncertain significance |
| 5084 | c. 3169A>C | rs80357479   | Benign     | Uncertain significance |
| 5085 | c. 3169A>G | rs80357479   | Pathogenic | Uncertain significance |
| 5086 | c. 3167C>T | rs587781588  | Benign     | Uncertain significance |
| 5087 | c. 3167C>G | rs587781588  | Benign     | Uncertain significance |
| 5088 | c. 3166T>C | rs876659601  | Benign     | Uncertain significance |
| 5089 | c. 3163G>A | rs749417532  | Pathogenic | Uncertain significance |
| 5090 | c. 3160G>A | rs876658479  | Pathogenic | Uncertain significance |
| 5091 | c. 3159A>G |              | Benign     | Uncertain significance |
| 5092 | c. 3159A>C | rs1567792698 | Benign     | Uncertain significance |
| 5093 | c. 3155A>G | rs398122672  | Benign     | Uncertain significance |
| 5094 | c. 3154A>G | rs768995134  | Pathogenic | Uncertain significance |
| 5095 | c. 3152C>T | rs397509039  | Benign     | Uncertain significance |
| 5096 | c. 3151A>G | rs398122671  | Pathogenic | Uncertain significance |
| 5097 | c. 3150T>G | rs1555588305 | Benign     | Uncertain significance |
| 5098 | c. 3149G>C |              | Benign     | Uncertain significance |
| 5099 | c. 3148A>G |              | Pathogenic | Uncertain significance |
| 5100 | c. 3143G>A | rs80356899   | Benign     | Uncertain significance |
| 5101 | c. 3139G>A |              | Pathogenic | Uncertain significance |
| 5102 | c. 3136G>C | rs1555588329 | Benign     | Uncertain significance |
| 5103 | c. 3134A>G | rs1555588330 | Benign     | Uncertain significance |
| 5104 | c. 3132T>G | rs1555588333 | Pathogenic | Uncertain significance |
| 5105 | c. 3131T>G |              | Benign     | Uncertain significance |
| 5106 | c. 3128A>C | rs1228972723 | Benign     | Uncertain significance |
| 5107 | c. 3127A>C | rs587782630  | Benign     | Uncertain significance |
| 5108 | c. 3127A>G | rs587782630  | Benign     | Uncertain significance |
| 5109 | c. 3126C>G | rs878854943  | Benign     | Uncertain significance |
| 5110 | c. 3124A>C |              | Benign     | Uncertain significance |
| 5111 | c. 3122C>T | rs397509035  | Benign     | Uncertain significance |
| 5112 | c. 3120C>T | rs1064794877 | Benign     | Uncertain significance |
| 5113 | c. 3119G>C | rs4986852    | Benign     | Uncertain significance |
| 5114 | c. 3116C>T | rs1173254670 | Benign     | Uncertain significance |
| 5115 | c. 3106T>C | rs766381694  | Benign     | Uncertain significance |
| 5116 | c. 3104T>C | rs1555588389 | Benign     | Uncertain significance |
| 5117 | c. 3097G>A | rs273899698  | Pathogenic | Uncertain significance |
| 5118 | c. 3093T>C |              | Benign     | Uncertain significance |
| 5119 | c. 3092T>G | rs863224758  | Benign     | Uncertain significance |
| 5120 | c. 3091A>G | rs786203979  | Benign     | Uncertain significance |
| 5121 | c. 3091A>T | rs786203979  | Benign     | Uncertain significance |
| 5122 | c. 3086A>G | rs753286589  | Benign     | Uncertain significance |
| 5123 | c. 3083G>T | rs80357459   | Benign     | Uncertain significance |
| 5124 | c. 3080G>C | rs80357386   | Benign     | Uncertain significance |
| 5125 | c. 3080G>A | rs80357386   | Pathogenic | Uncertain significance |
| 5126 | c. 3078T>G | rs1555588422 | Pathogenic | Uncertain significance |
| 5127 | c. 3071G>C | rs757579891  | Benign     | Uncertain significance |
| 5128 | c. 3071G>A | rs757579891  | Pathogenic | Uncertain significance |
| 5129 | c. 3065C>T | rs786202070  | Benign     | Uncertain significance |

|      |            |              |            |                        |
|------|------------|--------------|------------|------------------------|
| 5130 | c. 3053A>G | rs1567793093 | Benign     | Uncertain significance |
| 5131 | c. 3048T>G | rs879255482  | Benign     | Uncertain significance |
| 5132 | c. 3047A>G | rs1567793123 | Benign     | Uncertain significance |
| 5133 | c. 3046A>G | rs80357154   | Benign     | Uncertain significance |
| 5134 | c. 3042G>A | rs1555588493 | Pathogenic | Uncertain significance |
| 5135 | c. 3041T>A | rs80357020   | Benign     | Uncertain significance |
| 5136 | c. 3040A>T | rs80356933   | Benign     | Uncertain significance |
| 5137 | c. 3040A>G | rs80356933   | Benign     | Uncertain significance |
| 5138 | c. 3037G>A | rs1555588500 | Pathogenic | Uncertain significance |
| 5139 | c. 3036A>C | rs1567793150 | Benign     | Uncertain significance |
| 5140 | c. 3035G>C |              | Benign     | Uncertain significance |
| 5141 | c. 3035G>A | rs876658464  | Pathogenic | Uncertain significance |
| 5142 | c. 3034A>G | rs1555588503 | Benign     | Uncertain significance |
| 5143 | c. 3032A>G |              | Benign     | Uncertain significance |
| 5144 | c. 3031G>A | rs876659974  | Pathogenic | Uncertain significance |
| 5145 | c. 3029C>T |              | Benign     | Uncertain significance |
| 5146 | c. 3028C>T | rs1057519249 | Benign     | Uncertain significance |
| 5147 | c. 3024G>T |              | Benign     | Uncertain significance |
| 5148 | c. 3022A>C | rs56321129   | Benign     | Uncertain significance |
| 5149 | c. 3010G>C | rs786202534  | Benign     | Uncertain significance |
| 5150 | c. 3005A>T | rs1555588553 | Benign     | Uncertain significance |
| 5151 | c. 3004A>G | rs786202665  | Benign     | Uncertain significance |
| 5152 | c. 3001G>A |              | Benign     | Uncertain significance |
| 5153 | c. 3000G>C | rs748410422  | Benign     | Uncertain significance |
| 5154 | c. 2999A>G | rs1060502330 | Pathogenic | Uncertain significance |
| 5155 | c. 2998G>A | rs80357124   | Pathogenic | Uncertain significance |
| 5156 | c. 2996T>G | rs876659514  | Benign     | Uncertain significance |
| 5157 | c. 2995C>A | rs80356848   | Benign     | Uncertain significance |
| 5158 | c. 2993T>G |              | Benign     | Uncertain significance |
| 5159 | c. 2993T>A | rs1567793330 | Benign     | Uncertain significance |
| 5160 | c. 2992C>G | rs876659077  | Pathogenic | Uncertain significance |
| 5161 | c. 2990A>G |              | Benign     | Uncertain significance |
| 5162 | c. 2985G>T | rs1555588591 | Pathogenic | Uncertain significance |
| 5163 | c. 2983A>C |              | Benign     | Uncertain significance |
| 5164 | c. 2981G>T |              | Benign     | Uncertain significance |
| 5165 | c. 2981G>A | rs1238452758 | Pathogenic | Uncertain significance |
| 5166 | c. 2980T>C | rs144853230  | Benign     | Uncertain significance |
| 5167 | c. 2980T>A | rs144853230  | Benign     | Uncertain significance |
| 5168 | c. 2973A>C | rs876660683  | Benign     | Uncertain significance |
| 5169 | c. 2969T>C | rs760588785  | Benign     | Uncertain significance |
| 5170 | c. 2968G>A | rs397509029  | Pathogenic | Uncertain significance |
| 5171 | c. 2967T>G |              | Benign     | Uncertain significance |
| 5172 | c. 2967T>A | rs876659270  | Pathogenic | Uncertain significance |
| 5173 | c. 2960A>G | rs876659990  | Benign     | Uncertain significance |
| 5174 | c. 2959A>G | rs878854941  | Pathogenic | Uncertain significance |
| 5175 | c. 2953C>T | rs1555588649 | Benign     | Uncertain significance |
| 5176 | c. 2950T>C |              | Benign     | Uncertain significance |
| 5177 | c. 2942C>A | rs876659025  | Pathogenic | Uncertain significance |
| 5178 | c. 2941C>A | rs1555588677 | Pathogenic | Uncertain significance |
| 5179 | c. 2936G>T |              | Benign     | Uncertain significance |
| 5180 | c. 2935C>A | rs80356970   | Benign     | Uncertain significance |
| 5181 | c. 2933A>G | rs863224756  | Pathogenic | Uncertain significance |
| 5182 | c. 2932T>C | rs876659545  | Benign     | Uncertain significance |
| 5183 | c. 2930C>T | rs141465583  | Benign     | Uncertain significance |



|      |            |              |            |                        |
|------|------------|--------------|------------|------------------------|
| 5184 | c. 2929C>T | rs1064794043 | Benign     | Uncertain significance |
| 5185 | c. 2922A>C | rs730881487  | Benign     | Uncertain significance |
| 5186 | c. 2921T>C | rs80356872   | Benign     | Uncertain significance |
| 5187 | c. 2917C>A | rs80357080   | Benign     | Uncertain significance |
| 5188 | c. 2917C>G | rs80357080   | Benign     | Uncertain significance |
| 5189 | c. 2915G>A | rs587782721  | Pathogenic | Uncertain significance |
| 5190 | c. 2913T>G |              | Benign     | Uncertain significance |
| 5191 | c. 2911C>G | rs80357478   | Benign     | Uncertain significance |
| 5192 | c. 2911C>A | rs80357478   | Benign     | Uncertain significance |
| 5193 | c. 2909A>G |              | Benign     | Uncertain significance |
| 5194 | c. 2909A>T | rs756559408  | Pathogenic | Uncertain significance |
| 5195 | c. 2908A>G | rs1567793674 | Pathogenic | Uncertain significance |
| 5196 | c. 2906A>G | rs1567793695 | Benign     | Uncertain significance |
| 5197 | c. 2905A>G | rs587781641  | Benign     | Uncertain significance |
| 5198 | c. 2902C>T |              | Benign     | Uncertain significance |
| 5199 | c. 2899A>T | rs273899690  | Benign     | Uncertain significance |
| 5200 | c. 2897T>C | rs879254045  | Benign     | Uncertain significance |
| 5201 | c. 2894T>G | rs876660682  | Benign     | Uncertain significance |
| 5202 | c. 2893C>T |              | Benign     | Uncertain significance |
| 5203 | c. 2893C>G | rs1060502344 | Benign     | Uncertain significance |
| 5204 | c. 2890G>A | rs879254027  | Pathogenic | Uncertain significance |
| 5205 | c. 2888C>T | rs730881443  | Benign     | Uncertain significance |
| 5206 | c. 2885A>G | rs780367532  | Benign     | Uncertain significance |
| 5207 | c. 2882A>G | rs879254130  | Benign     | Uncertain significance |
| 5208 | c. 2881A>T |              | Pathogenic | Uncertain significance |
| 5209 | c. 2881A>C | rs786203786  | Benign     | Uncertain significance |
| 5210 | c. 2878G>A | rs1555588796 | Pathogenic | Uncertain significance |
| 5211 | c. 2877A>C | rs587782743  | Benign     | Uncertain significance |
| 5212 | c. 2875A>G |              | Pathogenic | Uncertain significance |
| 5213 | c. 2872T>C | rs80356878   | Benign     | Uncertain significance |
| 5214 | c. 2872T>A | rs80356878   | Benign     | Uncertain significance |
| 5215 | c. 2870A>C | rs1567793946 | Benign     | Uncertain significance |
| 5216 | c. 2867C>G | rs1060502336 | Pathogenic | Uncertain significance |
| 5217 | c. 2857T>C | rs1555588840 | Benign     | Uncertain significance |
| 5218 | c. 2851A>G |              | Pathogenic | Uncertain significance |
| 5219 | c. 2849C>T | rs1555588847 | Benign     | Uncertain significance |
| 5220 | c. 2846G>A | rs730881486  | Benign     | Uncertain significance |
| 5221 | c. 2845G>A | rs1324818767 | Pathogenic | Uncertain significance |
| 5222 | c. 2841A>T | rs864622618  | Pathogenic | Uncertain significance |
| 5223 | c. 2840A>G | rs778118145  | Benign     | Uncertain significance |
| 5224 | c. 2836A>G |              | Pathogenic | Uncertain significance |
| 5225 | c. 2836A>T | rs876660901  | Benign     | Uncertain significance |
| 5226 | c. 2833A>G | rs1567794085 | Pathogenic | Uncertain significance |
| 5227 | c. 2831G>A | rs770769275  | Pathogenic | Uncertain significance |
| 5228 | c. 2830T>A | rs1064795603 | Benign     | Uncertain significance |
| 5229 | c. 2823T>G |              | Benign     | Uncertain significance |
| 5230 | c. 2822A>G | rs776512377  | Benign     | Uncertain significance |
| 5231 | c. 2818G>C | rs80357077   | Benign     | Uncertain significance |
| 5232 | c. 2818G>T | rs80357077   | Pathogenic | Uncertain significance |
| 5233 | c. 2816T>C | rs1555588894 | Benign     | Uncertain significance |
| 5234 | c. 2815G>A | rs1555588896 | Benign     | Uncertain significance |
| 5235 | c. 2813C>T | rs1064793999 | Benign     | Uncertain significance |
| 5236 | c. 2812C>T |              | Benign     | Uncertain significance |
| 5237 | c. 2808T>G | rs730881485  | Benign     | Uncertain significance |

|      |            |              |            |                        |
|------|------------|--------------|------------|------------------------|
| 5238 | c. 2798G>A | rs80356941   | Pathogenic | Uncertain significance |
| 5239 | c. 2794G>T |              | Benign     | Uncertain significance |
| 5240 | c. 2791G>A | rs763639161  | Pathogenic | Uncertain significance |
| 5241 | c. 2791G>T | rs763639161  | Benign     | Uncertain significance |
| 5242 | c. 2789C>T | rs80357256   | Benign     | Uncertain significance |
| 5243 | c. 2783G>A | rs202004680  | Benign     | Uncertain significance |
| 5244 | c. 2782G>A | rs80356995   | Pathogenic | Uncertain significance |
| 5245 | c. 2774T>C | rs1567794296 | Benign     | Uncertain significance |
| 5246 | c. 2768T>C |              | Benign     | Uncertain significance |
| 5247 | c. 2765C>T | rs80357460   | Benign     | Uncertain significance |
| 5248 | c. 2765C>G | rs80357460   | Benign     | Uncertain significance |
| 5249 | c. 2764A>G | rs1555588988 | Benign     | Uncertain significance |
| 5250 | c. 2762A>G | rs1555588991 | Pathogenic | Uncertain significance |
| 5251 | c. 2759T>C | rs80357008   | Benign     | Uncertain significance |
| 5252 | c. 2758G>T | rs80357361   | Benign     | Uncertain significance |
| 5253 | c. 2754G>T | rs398122668  | Benign     | Uncertain significance |
| 5254 | c. 2752A>C | rs397509010  | Benign     | Uncertain significance |
| 5255 | c. 2751C>G |              | Pathogenic | Uncertain significance |
| 5256 | c. 2750T>G | rs587781492  | Benign     | Uncertain significance |
| 5257 | c. 2750T>C | rs587781492  | Benign     | Uncertain significance |
| 5258 | c. 2747A>G | rs864622588  | Benign     | Uncertain significance |
| 5259 | c. 2747A>T | rs864622588  | Pathogenic | Uncertain significance |
| 5260 | c. 2746A>G | rs398122666  | Pathogenic | Uncertain significance |
| 5261 | c. 2746A>T | rs398122666  | Pathogenic | Uncertain significance |
| 5262 | c. 2740G>A | rs80357419   | Pathogenic | Uncertain significance |
| 5263 | c. 2739T>A | rs273899688  | Benign     | Uncertain significance |
| 5264 | c. 2738A>G | rs199954851  | Benign     | Uncertain significance |
| 5265 | c. 2737A>G |              | Benign     | Uncertain significance |
| 5266 | c. 2736G>T | rs1555589046 | Pathogenic | Uncertain significance |
| 5267 | c. 2736G>C | rs1555589046 | Benign     | Uncertain significance |
| 5268 | c. 2734A>C | rs1555589048 | Benign     | Uncertain significance |
| 5269 | c. 2732G>A | rs431825392  | Benign     | Uncertain significance |
| 5270 | c. 2728C>G | rs397509004  | Pathogenic | Uncertain significance |
| 5271 | c. 2724A>C | rs1350643283 | Benign     | Uncertain significance |
| 5272 | c. 2723A>C | rs1064794969 | Benign     | Uncertain significance |
| 5273 | c. 2723A>G | rs1064794969 | Benign     | Uncertain significance |
| 5274 | c. 2720A>G | rs1555589078 | Benign     | Uncertain significance |
| 5275 | c. 2716A>C | rs1567794535 | Benign     | Uncertain significance |
| 5276 | c. 2714A>G | rs397507203  | Benign     | Uncertain significance |
| 5277 | c. 2710G>C | rs80357035   | Benign     | Uncertain significance |
| 5278 | c. 2708G>A |              | Pathogenic | Uncertain significance |
| 5279 | c. 2707T>C | rs1555589103 | Benign     | Uncertain significance |
| 5280 | c. 2706A>C | rs398122665  | Benign     | Uncertain significance |
| 5281 | c. 2702T>C | rs397507202  | Benign     | Uncertain significance |
| 5282 | c. 2696T>G | rs1064794483 | Benign     | Uncertain significance |
| 5283 | c. 2692A>G | rs80357420   | Benign     | Uncertain significance |
| 5284 | c. 2690C>T | rs587776484  | Benign     | Uncertain significance |
| 5285 | c. 2689C>T | rs770583134  | Benign     | Uncertain significance |
| 5286 | c. 2686A>T | rs80357188   | Pathogenic | Uncertain significance |
| 5287 | c. 2684A>G | rs587781914  | Benign     | Uncertain significance |
| 5288 | c. 2682A>T | rs1131692093 | Benign     | Uncertain significance |
| 5289 | c. 2679G>T | rs587781771  | Pathogenic | Uncertain significance |
| 5290 | c. 2678A>G | rs1567794714 | Benign     | Uncertain significance |
| 5291 | c. 2677A>C | rs80357170   | Benign     | Uncertain significance |



|      |            |              |            |                        |
|------|------------|--------------|------------|------------------------|
| 5292 | c. 2666C>A | rs769712441  | Pathogenic | Uncertain significance |
| 5293 | c. 2663A>G | rs876658843  | Benign     | Uncertain significance |
| 5294 | c. 2663A>T | rs876658843  | Benign     | Uncertain significance |
| 5295 | c. 2663A>C | rs876658843  | Benign     | Uncertain significance |
| 5296 | c. 2654T>A | rs1567794788 | Benign     | Uncertain significance |
| 5297 | c. 2650A>G | rs80357120   | Benign     | Uncertain significance |
| 5298 | c. 2648C>T | rs431825391  | Pathogenic | Uncertain significance |
| 5299 | c. 2647G>A |              | Pathogenic | Uncertain significance |
| 5300 | c. 2645G>A | rs1555589241 | Pathogenic | Uncertain significance |
| 5301 | c. 2644T>C | rs184374817  | Benign     | Uncertain significance |
| 5302 | c. 2644T>A | rs184374817  | Benign     | Uncertain significance |
| 5303 | c. 2638G>C | rs587782370  | Benign     | Uncertain significance |
| 5304 | c. 2635G>A | rs80357251   | Pathogenic | Uncertain significance |
| 5305 | c. 2633C>T | rs1555589255 | Pathogenic | Uncertain significance |
| 5306 | c. 2632G>A | rs80357230   | Pathogenic | Uncertain significance |
| 5307 | c. 2626G>A | rs1567794885 | Pathogenic | Uncertain significance |
| 5308 | c. 2623C>T | rs866257451  | Benign     | Uncertain significance |
| 5309 | c. 2620A>G |              | Benign     | Uncertain significance |
| 5310 | c. 2620A>C | rs1064795862 | Benign     | Uncertain significance |
| 5311 | c. 2618C>T | rs1567794912 | Pathogenic | Uncertain significance |
| 5312 | c. 2615T>C |              | Benign     | Uncertain significance |
| 5313 | c. 2612C>A | rs799917     | Benign     | Uncertain significance |
| 5314 | c. 2609C>G | rs1060502324 | Benign     | Uncertain significance |
| 5315 | c. 2609C>T | rs1060502324 | Benign     | Uncertain significance |
| 5316 | c. 2608G>A | rs753256448  | Pathogenic | Uncertain significance |
| 5317 | c. 2599C>G |              | Benign     | Uncertain significance |
| 5318 | c. 2591C>T | rs80357003   | Pathogenic | Uncertain significance |
| 5319 | c. 2590T>G | rs80357285   | Pathogenic | Uncertain significance |
| 5320 | c. 2587G>A | rs1555589325 | Benign     | Uncertain significance |
| 5321 | c. 2586G>C | rs1555589330 | Benign     | Uncertain significance |
| 5322 | c. 2585A>G |              | Benign     | Uncertain significance |
| 5323 | c. 2583C>G | rs1555589334 | Pathogenic | Uncertain significance |
| 5324 | c. 2582T>G | rs80357098   | Pathogenic | Uncertain significance |
| 5325 | c. 2579C>T | rs1555589337 | Benign     | Uncertain significance |
| 5326 | c. 2578A>G |              | Pathogenic | Uncertain significance |
| 5327 | c. 2576A>G |              | Benign     | Uncertain significance |
| 5328 | c. 2575A>G | rs1555589354 | Benign     | Uncertain significance |
| 5329 | c. 2569T>A |              | Pathogenic | Uncertain significance |
| 5330 | c. 2567A>G | rs864622122  | Pathogenic | Uncertain significance |
| 5331 | c. 2564A>G | rs768001441  | Pathogenic | Uncertain significance |
| 5332 | c. 2564A>T | rs768001441  | Pathogenic | Uncertain significance |
| 5333 | c. 2564A>C | rs768001441  | Benign     | Uncertain significance |
| 5334 | c. 2563C>A | rs80357131   | Pathogenic | Uncertain significance |
| 5335 | c. 2561C>T | rs80357315   | Benign     | Uncertain significance |
| 5336 | c. 2560G>A |              | Pathogenic | Uncertain significance |
| 5337 | c. 2555T>C | rs1555589415 | Benign     | Uncertain significance |
| 5338 | c. 2554C>G | rs863224754  | Benign     | Uncertain significance |
| 5339 | c. 2552A>G | rs1567795186 | Benign     | Uncertain significance |
| 5340 | c. 2551G>A | rs398122662  | Pathogenic | Uncertain significance |
| 5341 | c. 2548A>C | rs1555589429 | Benign     | Uncertain significance |
| 5342 | c. 2546A>G | rs1567795227 | Benign     | Uncertain significance |
| 5343 | c. 2543A>G |              | Benign     | Uncertain significance |
| 5344 | c. 2541G>A | rs80357195   | Pathogenic | Uncertain significance |
| 5345 | c. 2539A>G | rs1555589446 | Benign     | Uncertain significance |

|      |            |              |            |                        |
|------|------------|--------------|------------|------------------------|
| 5346 | c. 2538A>C | rs1567795266 | Benign     | Uncertain significance |
| 5347 | c. 2536G>A | rs786203523  | Pathogenic | Uncertain significance |
| 5348 | c. 2535A>G |              | Pathogenic | Uncertain significance |
| 5349 | c. 2534T>C | rs397508976  | Benign     | Uncertain significance |
| 5350 | c. 2531G>A | rs56051266   | Pathogenic | Uncertain significance |
| 5351 | c. 2528C>G | rs1555589466 | Benign     | Uncertain significance |
| 5352 | c. 2527A>G | rs80357435   | Benign     | Uncertain significance |
| 5353 | c. 2524G>A | rs876658552  | Pathogenic | Uncertain significance |
| 5354 | c. 2522G>C | rs80357337   | Benign     | Uncertain significance |
| 5355 | c. 2518A>C | rs377475866  | Benign     | Uncertain significance |
| 5356 | c. 2518A>G | rs377475866  | Pathogenic | Uncertain significance |
| 5357 | c. 2516A>G |              | Benign     | Uncertain significance |
| 5358 | c. 2504A>C |              | Benign     | Uncertain significance |
| 5359 | c. 2503C>T | rs751656678  | Benign     | Uncertain significance |
| 5360 | c. 2501G>T | rs757383244  | Pathogenic | Uncertain significance |
| 5361 | c. 2501G>A | rs757383244  | Pathogenic | Uncertain significance |
| 5362 | c. 2491T>C |              | Benign     | Uncertain significance |
| 5363 | c. 2491T>G | rs1060502350 | Benign     | Uncertain significance |
| 5364 | c. 2489A>T |              | Pathogenic | Uncertain significance |
| 5365 | c. 2483G>T | rs1555589578 | Benign     | Uncertain significance |
| 5366 | c. 2482G>A | rs80357185   | Benign     | Uncertain significance |
| 5367 | c. 2479G>C |              | Benign     | Uncertain significance |
| 5368 | c. 2477C>T |              | Benign     | Uncertain significance |
| 5369 | c. 2476A>C |              | Benign     | Uncertain significance |
| 5370 | c. 2474A>T | rs80357249   | Benign     | Uncertain significance |
| 5371 | c. 2471A>G | rs1485586275 | Benign     | Uncertain significance |
| 5372 | c. 2470A>C | rs1555589617 | Benign     | Uncertain significance |
| 5373 | c. 2468G>C | rs876659731  | Benign     | Uncertain significance |
| 5374 | c. 2468G>T | rs876659731  | Pathogenic | Uncertain significance |
| 5375 | c. 2466T>G | rs1064794701 | Benign     | Uncertain significance |
| 5376 | c. 2465A>G | rs1555589630 | Benign     | Uncertain significance |
| 5377 | c. 2456C>G | rs192655097  | Benign     | Uncertain significance |
| 5378 | c. 2450G>T | rs1060502365 | Benign     | Uncertain significance |
| 5379 | c. 2449G>A | rs1555589646 | Pathogenic | Uncertain significance |
| 5380 | c. 2447A>T | rs80357108   | Benign     | Uncertain significance |
| 5381 | c. 2444T>C | rs730881484  | Benign     | Uncertain significance |
| 5382 | c. 2437G>A | rs80357186   | Benign     | Uncertain significance |
| 5383 | c. 2436G>A | rs1060502338 | Pathogenic | Uncertain significance |
| 5384 | c. 2435A>G |              | Benign     | Uncertain significance |
| 5385 | c. 2425G>A | rs786204151  | Pathogenic | Uncertain significance |
| 5386 | c. 2423T>C | rs398122660  | Benign     | Uncertain significance |
| 5387 | c. 2420C>A | rs273899683  | Benign     | Uncertain significance |
| 5388 | c. 2419G>A |              | Pathogenic | Uncertain significance |
| 5389 | c. 2419G>T | rs80357240   | Benign     | Uncertain significance |
| 5390 | c. 2417C>T | rs1555589705 | Pathogenic | Uncertain significance |
| 5391 | c. 2414G>A | rs1060502352 | Pathogenic | Uncertain significance |
| 5392 | c. 2410C>G | rs80356982   | Pathogenic | Uncertain significance |
| 5393 | c. 2405T>G | rs1555589737 | Benign     | Uncertain significance |
| 5394 | c. 2404G>A | rs876660885  | Pathogenic | Uncertain significance |
| 5395 | c. 2404G>C | rs876660885  | Pathogenic | Uncertain significance |
| 5396 | c. 2404G>T | rs876660885  | Benign     | Uncertain significance |
| 5397 | c. 2403T>G | rs80357381   | Benign     | Uncertain significance |
| 5398 | c. 2402G>A | rs1567795821 | Pathogenic | Uncertain significance |
| 5399 | c. 2401T>C | rs1064793591 | Benign     | Uncertain significance |

|      |            |              |            |                        |
|------|------------|--------------|------------|------------------------|
| 5400 | c. 2397T>A | rs80357203   | Benign     | Uncertain significance |
| 5401 | c. 2396A>G | rs587782027  | Benign     | Uncertain significance |
| 5402 | c. 2393C>G | rs876660005  | Benign     | Uncertain significance |
| 5403 | c. 2392C>G | rs398122658  | Benign     | Uncertain significance |
| 5404 | c. 2392C>A | rs398122658  | Benign     | Uncertain significance |
| 5405 | c. 2392C>T | rs398122658  | Benign     | Uncertain significance |
| 5406 | c. 2389G>A | rs62625306   | Pathogenic | Uncertain significance |
| 5407 | c. 2387C>G | rs80357364   | Benign     | Uncertain significance |
| 5408 | c. 2387C>T | rs80357364   | Benign     | Uncertain significance |
| 5409 | c. 2383A>G | rs1567795889 | Benign     | Uncertain significance |
| 5410 | c. 2381C>T | rs7502059    | Pathogenic | Uncertain significance |
| 5411 | c. 2375G>A |              | Benign     | Uncertain significance |
| 5412 | c. 2372T>G |              | Benign     | Uncertain significance |
| 5413 | c. 2371C>G | rs1567795916 | Benign     | Uncertain significance |
| 5414 | c. 2366G>A |              | Pathogenic | Uncertain significance |
| 5415 | c. 2365A>G |              | Pathogenic | Uncertain significance |
| 5416 | c. 2362G>A | rs80357060   | Benign     | Uncertain significance |
| 5417 | c. 2357T>C | rs760864137  | Benign     | Uncertain significance |
| 5418 | c. 2355A>C | rs1567795966 | Benign     | Uncertain significance |
| 5419 | c. 2351C>G |              | Pathogenic | Uncertain significance |
| 5420 | c. 2350T>G | rs80357399   | Benign     | Uncertain significance |
| 5421 | c. 2346T>A | rs1555589837 | Benign     | Uncertain significance |
| 5422 | c. 2345G>T | rs1567796012 | Benign     | Uncertain significance |
| 5423 | c. 2344A>G | rs1433746078 | Benign     | Uncertain significance |
| 5424 | c. 2342A>C | rs587776482  | Benign     | Uncertain significance |
| 5425 | c. 2341G>C | rs757933953  | Benign     | Uncertain significance |
| 5426 | c. 2339A>G | rs1410232200 | Pathogenic | Uncertain significance |
| 5427 | c. 2338C>G | rs80356945   | Pathogenic | Uncertain significance |
| 5428 | c. 2338C>A | rs80356945   | Pathogenic | Uncertain significance |
| 5429 | c. 2333G>A | rs730881483  | Benign     | Uncertain significance |
| 5430 | c. 2329T>C |              | Benign     | Uncertain significance |
| 5431 | c. 2324C>T |              | Benign     | Uncertain significance |
| 5432 | c. 2321G>A | rs730881482  | Pathogenic | Uncertain significance |
| 5433 | c. 2320G>T | rs1555589917 | Benign     | Uncertain significance |
| 5434 | c. 2314G>A | rs1567796129 | Pathogenic | Uncertain significance |
| 5435 | c. 2312T>C | rs730881481  | Benign     | Uncertain significance |
| 5436 | c. 2303G>A |              | Pathogenic | Uncertain significance |
| 5437 | c. 2302A>G | rs398122656  | Pathogenic | Uncertain significance |
| 5438 | c. 2300G>C | rs1567796202 | Benign     | Uncertain significance |
| 5439 | c. 2299A>T | rs80357194   | Pathogenic | Uncertain significance |
| 5440 | c. 2299A>G | rs80357194   | Pathogenic | Uncertain significance |
| 5441 | c. 2298T>A |              | Benign     | Uncertain significance |
| 5442 | c. 2297G>A | rs1567796224 | Pathogenic | Uncertain significance |
| 5443 | c. 2296A>C | rs398122655  | Benign     | Uncertain significance |
| 5444 | c. 2296A>G | rs398122655  | Pathogenic | Uncertain significance |
| 5445 | c. 2294A>G | rs80357085   | Pathogenic | Uncertain significance |
| 5446 | c. 2290G>A |              | Pathogenic | Uncertain significance |
| 5447 | c. 2288C>A |              | Pathogenic | Uncertain significance |
| 5448 | c. 2288C>G | rs876660112  | Pathogenic | Uncertain significance |
| 5449 | c. 2286A>G | rs273898682  | Benign     | Uncertain significance |
| 5450 | c. 2282A>C | rs80356869   | Benign     | Uncertain significance |
| 5451 | c. 2281G>C | rs397507198  | Benign     | Uncertain significance |
| 5452 | c. 2281G>A | rs397507198  | Pathogenic | Uncertain significance |
| 5453 | c. 2279C>T |              | Benign     | Uncertain significance |

|      |            |              |            |                        |
|------|------------|--------------|------------|------------------------|
| 5454 | c. 2274G>T |              | Benign     | Uncertain significance |
| 5455 | c. 2269G>T | rs772617029  | Benign     | Uncertain significance |
| 5456 | c. 2267G>A | rs975724885  | Pathogenic | Uncertain significance |
| 5457 | c. 2266A>G | rs1064795091 | Benign     | Uncertain significance |
| 5458 | c. 2264A>C | rs922908090  | Benign     | Uncertain significance |
| 5459 | c. 2263G>A | rs41286296   | Pathogenic | Uncertain significance |
| 5460 | c. 2259T>G | rs730881480  | Benign     | Uncertain significance |
| 5461 | c. 2258G>A | rs878854939  | Pathogenic | Uncertain significance |
| 5462 | c. 2253G>C | rs1555590040 | Benign     | Uncertain significance |
| 5463 | c. 2249T>C | rs1555590048 | Benign     | Uncertain significance |
| 5464 | c. 2246A>T | rs730881479  | Benign     | Uncertain significance |
| 5465 | c. 2245G>A | rs80357114   | Pathogenic | Uncertain significance |
| 5466 | c. 2245G>C | rs80357114   | Benign     | Uncertain significance |
| 5467 | c. 2245G>T | rs80357114   | Pathogenic | Uncertain significance |
| 5468 | c. 2243A>G | rs1567796448 | Benign     | Uncertain significance |
| 5469 | c. 2242A>G |              | Benign     | Uncertain significance |
| 5470 | c. 2239C>T | rs1555590087 | Benign     | Uncertain significance |
| 5471 | c. 2238C>A | rs786202757  | Benign     | Uncertain significance |
| 5472 | c. 2236G>T | rs876660267  | Pathogenic | Uncertain significance |
| 5473 | c. 2235A>C | rs876660266  | Benign     | Uncertain significance |
| 5474 | c. 2232T>A |              | Benign     | Uncertain significance |
| 5475 | c. 2231C>A | rs786204220  | Benign     | Uncertain significance |
| 5476 | c. 2228A>G | rs1567796489 | Benign     | Uncertain significance |
| 5477 | c. 2227A>C | rs1212635015 | Benign     | Uncertain significance |
| 5478 | c. 2225A>G | rs1060499618 | Benign     | Uncertain significance |
| 5479 | c. 2222C>G | rs80357051   | Benign     | Uncertain significance |
| 5480 | c. 2218G>A |              | Benign     | Uncertain significance |
| 5481 | c. 2218G>T | rs80357415   | Benign     | Uncertain significance |
| 5482 | c. 2218G>C | rs80357415   | Benign     | Uncertain significance |
| 5483 | c. 2217A>C | rs200521980  | Benign     | Uncertain significance |
| 5484 | c. 2215A>C | rs56329598   | Benign     | Uncertain significance |
| 5485 | c. 2215A>G | rs56329598   | Pathogenic | Uncertain significance |
| 5486 | c. 2209A>G | rs1567796585 | Benign     | Uncertain significance |
| 5487 | c. 2203C>G | rs587781781  | Benign     | Uncertain significance |
| 5488 | c. 2195A>C | rs876660463  | Benign     | Uncertain significance |
| 5489 | c. 2185G>A | rs876659852  | Pathogenic | Uncertain significance |
| 5490 | c. 2183G>C | rs80357335   | Benign     | Uncertain significance |
| 5491 | c. 2183G>A | rs80357335   | Pathogenic | Uncertain significance |
| 5492 | c. 2182A>G | rs1555590265 | Benign     | Uncertain significance |
| 5493 | c. 2174G>C | rs1555590284 | Benign     | Uncertain significance |
| 5494 | c. 2173A>G | rs1555590290 | Pathogenic | Uncertain significance |
| 5495 | c. 2171C>T | rs751104940  | Benign     | Uncertain significance |
| 5496 | c. 2165T>C | rs1555590311 | Benign     | Uncertain significance |
| 5497 | c. 2158G>A | rs80356875   | Pathogenic | Uncertain significance |
| 5498 | c. 2156A>C | rs876660920  | Benign     | Uncertain significance |
| 5499 | c. 2153T>G | rs748550848  | Benign     | Uncertain significance |
| 5500 | c. 2148T>A | rs730881478  | Benign     | Uncertain significance |
| 5501 | c. 2147G>C | rs1555590369 | Benign     | Uncertain significance |
| 5502 | c. 2143A>T | rs730881477  | Benign     | Uncertain significance |
| 5503 | c. 2135G>T | rs1555590395 | Benign     | Uncertain significance |
| 5504 | c. 2134T>C | rs786202015  | Benign     | Uncertain significance |
| 5505 | c. 2131A>C | rs747046197  | Benign     | Uncertain significance |
| 5506 | c. 2131A>G | rs747046197  | Pathogenic | Uncertain significance |
| 5507 | c. 2128A>G | rs876659959  | Pathogenic | Uncertain significance |



|      |            |              |            |                        |
|------|------------|--------------|------------|------------------------|
| 5508 | c. 2126T>G | rs1567796937 | Benign     | Uncertain significance |
| 5509 | c. 2125T>G |              | Benign     | Uncertain significance |
| 5510 | c. 2123C>G | rs80357182   | Benign     | Uncertain significance |
| 5511 | c. 2120G>A | rs80357192   | Benign     | Uncertain significance |
| 5512 | c. 2119G>C | rs587781420  | Benign     | Uncertain significance |
| 5513 | c. 2117C>T | rs759655692  | Benign     | Uncertain significance |
| 5514 | c. 2116C>T |              | Benign     | Uncertain significance |
| 5515 | c. 2113G>A |              | Pathogenic | Uncertain significance |
| 5516 | c. 2110A>C |              | Benign     | Uncertain significance |
| 5517 | c. 2108C>T | rs1302055573 | Benign     | Uncertain significance |
| 5518 | c. 2102A>G | rs876658307  | Benign     | Uncertain significance |
| 5519 | c. 2099T>A |              | Benign     | Uncertain significance |
| 5520 | c. 2099T>C | rs1567797015 | Benign     | Uncertain significance |
| 5521 | c. 2096A>G |              | Pathogenic | Uncertain significance |
| 5522 | c. 2095G>C | rs876658306  | Benign     | Uncertain significance |
| 5523 | c. 2093C>T | rs1555590478 | Benign     | Uncertain significance |
| 5524 | c. 2090T>A | rs730881476  | Benign     | Uncertain significance |
| 5525 | c. 2090T>C | rs730881476  | Benign     | Uncertain significance |
| 5526 | c. 2087C>T |              | Benign     | Uncertain significance |
| 5527 | c. 2081G>A | rs431825388  | Pathogenic | Uncertain significance |
| 5528 | c. 2078A>G | rs756748588  | Benign     | Uncertain significance |
| 5529 | c. 2076T>A | rs587782595  | Benign     | Uncertain significance |
| 5530 | c. 2075A>C |              | Benign     | Uncertain significance |
| 5531 | c. 2074C>T | rs545736576  | Benign     | Uncertain significance |
| 5532 | c. 2072G>C | rs1555590574 | Benign     | Uncertain significance |
| 5533 | c. 2071A>G |              | Benign     | Uncertain significance |
| 5534 | c. 2068A>G | rs587781448  | Pathogenic | Uncertain significance |
| 5535 | c. 2065A>G | rs876660188  | Benign     | Uncertain significance |
| 5536 | c. 2062A>G |              | Benign     | Uncertain significance |
| 5537 | c. 2058A>T | rs1262148583 | Benign     | Uncertain significance |
| 5538 | c. 2050C>A | rs397508934  | Benign     | Uncertain significance |
| 5539 | c. 2050C>T | rs397508934  | Benign     | Uncertain significance |
| 5540 | c. 2048A>G | rs1060502357 | Benign     | Uncertain significance |
| 5541 | c. 2042G>A | rs1452826319 | Pathogenic | Uncertain significance |
| 5542 | c. 2039A>G | rs730881475  | Benign     | Uncertain significance |
| 5543 | c. 2038A>G | rs1135401850 | Benign     | Uncertain significance |
| 5544 | c. 2036A>C |              | Benign     | Uncertain significance |
| 5545 | c. 2033C>T | rs1555590634 | Benign     | Uncertain significance |
| 5546 | c. 2029G>A |              | Pathogenic | Uncertain significance |
| 5547 | c. 2027C>T |              | Benign     | Uncertain significance |
| 5548 | c. 2023G>A |              | Pathogenic | Uncertain significance |
| 5549 | c. 2021C>G | rs876660543  | Benign     | Uncertain significance |
| 5550 | c. 2017G>C |              | Benign     | Uncertain significance |
| 5551 | c. 2014A>G | rs397508929  | Pathogenic | Uncertain significance |
| 5552 | c. 2008G>A | rs80357029   | Pathogenic | Uncertain significance |
| 5553 | c. 1997T>C | rs1567797346 | Benign     | Uncertain significance |
| 5554 | c. 1996C>G | rs1555590709 | Benign     | Uncertain significance |
| 5555 | c. 1995C>G | rs80357238   | Benign     | Uncertain significance |
| 5556 | c. 1985A>G | rs80357494   | Benign     | Uncertain significance |
| 5557 | c. 1984C>T | rs397508927  | Benign     | Uncertain significance |
| 5558 | c. 1981A>G | rs1555590724 | Pathogenic | Uncertain significance |
| 5559 | c. 1979T>C | rs1567797385 | Benign     | Uncertain significance |
| 5560 | c. 1978G>T |              | Benign     | Uncertain significance |
| 5561 | c. 1978G>A | rs876660889  | Benign     | Uncertain significance |

|      |            |              |            |                        |
|------|------------|--------------|------------|------------------------|
| 5562 | c. 1975C>G | rs587776481  | Benign     | Uncertain significance |
| 5563 | c. 1969C>A | rs397508926  | Benign     | Uncertain significance |
| 5564 | c. 1967A>G | rs397508925  | Benign     | Uncertain significance |
| 5565 | c. 1966A>T | rs786203455  | Pathogenic | Uncertain significance |
| 5566 | c. 1964A>T | rs80357193   | Benign     | Uncertain significance |
| 5567 | c. 1963T>G | rs80357166   | Benign     | Uncertain significance |
| 5568 | c. 1954A>G | rs1567797589 | Benign     | Uncertain significance |
| 5569 | c. 1951A>G |              | Benign     | Uncertain significance |
| 5570 | c. 1951A>C | rs1555590804 | Benign     | Uncertain significance |
| 5571 | c. 1949T>G | rs1555590816 | Benign     | Uncertain significance |
| 5572 | c. 1949T>C | rs1555590816 | Benign     | Uncertain significance |
| 5573 | c. 1945G>C | rs80356907   | Benign     | Uncertain significance |
| 5574 | c. 1934C>G | rs80357129   | Benign     | Uncertain significance |
| 5575 | c. 1934C>A | rs80357129   | Pathogenic | Uncertain significance |
| 5576 | c. 1933T>C |              | Benign     | Uncertain significance |
| 5577 | c. 1931G>C | rs876658606  | Benign     | Uncertain significance |
| 5578 | c. 1931G>T | rs876658606  | Benign     | Uncertain significance |
| 5579 | c. 1930T>A | rs753521391  | Pathogenic | Uncertain significance |
| 5580 | c. 1929T>G | rs1060502361 | Benign     | Uncertain significance |
| 5581 | c. 1928G>T | rs876660335  | Benign     | Uncertain significance |
| 5582 | c. 1925A>G | rs786204049  | Benign     | Uncertain significance |
| 5583 | c. 1924G>A | rs80357344   | Pathogenic | Uncertain significance |
| 5584 | c. 1924G>T | rs80357344   | Pathogenic | Uncertain significance |
| 5585 | c. 1922T>C | rs730881474  | Benign     | Uncertain significance |
| 5586 | c. 1920A>C |              | Benign     | Uncertain significance |
| 5587 | c. 1920A>T | rs587782843  | Pathogenic | Uncertain significance |
| 5588 | c. 1919A>C | rs786203965  | Benign     | Uncertain significance |
| 5589 | c. 1917G>T |              | Benign     | Uncertain significance |
| 5590 | c. 1913A>C | rs786201944  | Benign     | Uncertain significance |
| 5591 | c. 1910C>T | rs1555590925 | Benign     | Uncertain significance |
| 5592 | c. 1907G>C | rs398122649  | Benign     | Uncertain significance |
| 5593 | c. 1906T>G |              | Benign     | Uncertain significance |
| 5594 | c. 1905T>G |              | Benign     | Uncertain significance |
| 5595 | c. 1904A>G |              | Benign     | Uncertain significance |
| 5596 | c. 1903A>G | rs1567797783 | Pathogenic | Uncertain significance |
| 5597 | c. 1901C>T | rs80357121   | Benign     | Uncertain significance |
| 5598 | c. 1901C>G | rs80357121   | Benign     | Uncertain significance |
| 5599 | c. 1900C>T | rs80357056   | Benign     | Uncertain significance |
| 5600 | c. 1898C>T | rs398122647  | Benign     | Uncertain significance |
| 5601 | c. 1897C>A | rs80356902   | Pathogenic | Uncertain significance |
| 5602 | c. 1895G>A | rs80356983   | Pathogenic | Uncertain significance |
| 5603 | c. 1892T>C | rs1386991114 | Benign     | Uncertain significance |
| 5604 | c. 1891C>A | rs876659175  | Pathogenic | Uncertain significance |
| 5605 | c. 1888A>T |              | Pathogenic | Uncertain significance |
| 5606 | c. 1886G>T | rs876660144  | Pathogenic | Uncertain significance |
| 5607 | c. 1885A>G |              | Pathogenic | Uncertain significance |
| 5608 | c. 1884T>G | rs80357495   | Benign     | Uncertain significance |
| 5609 | c. 1882A>G | rs1555591000 | Pathogenic | Uncertain significance |
| 5610 | c. 1881C>G | rs80356838   | Pathogenic | Uncertain significance |
| 5611 | c. 1880T>A | rs770002293  | Benign     | Uncertain significance |
| 5612 | c. 1880T>G | rs770002293  | Benign     | Uncertain significance |
| 5613 | c. 1870G>A | rs80356950   | Pathogenic | Uncertain significance |
| 5614 | c. 1868T>C | rs397508915  | Benign     | Uncertain significance |
| 5615 | c. 1865C>G |              | Benign     | Uncertain significance |



|      |            |              |            |                        |
|------|------------|--------------|------------|------------------------|
| 5616 | c. 1864G>A | rs1567797954 | Pathogenic | Uncertain significance |
| 5617 | c. 1861C>T |              | Benign     | Uncertain significance |
| 5618 | c. 1859T>A | rs1555591085 | Benign     | Uncertain significance |
| 5619 | c. 1856A>G | rs771890863  | Benign     | Uncertain significance |
| 5620 | c. 1854G>T |              | Benign     | Uncertain significance |
| 5621 | c. 1853G>C | rs876659527  | Benign     | Uncertain significance |
| 5622 | c. 1853G>A | rs876659527  | Pathogenic | Uncertain significance |
| 5623 | c. 1844C>T | rs398122645  | Benign     | Uncertain significance |
| 5624 | c. 1842G>T | rs760109939  | Benign     | Uncertain significance |
| 5625 | c. 1841A>G |              | Benign     | Uncertain significance |
| 5626 | c. 1838G>T |              | Benign     | Uncertain significance |
| 5627 | c. 1838G>A | rs786203937  | Pathogenic | Uncertain significance |
| 5628 | c. 1829G>C | rs876660322  | Benign     | Uncertain significance |
| 5629 | c. 1829G>A | rs876660322  | Pathogenic | Uncertain significance |
| 5630 | c. 1828A>G | rs398122644  | Pathogenic | Uncertain significance |
| 5631 | c. 1826A>G | rs80357236   | Benign     | Uncertain significance |
| 5632 | c. 1819A>G | rs80357220   | Pathogenic | Uncertain significance |
| 5633 | c. 1814C>A | rs1555591195 | Benign     | Uncertain significance |
| 5634 | c. 1813G>C | rs587781613  | Benign     | Uncertain significance |
| 5635 | c. 1813G>T | rs587781613  | Benign     | Uncertain significance |
| 5636 | c. 1807T>G | rs1555591208 | Pathogenic | Uncertain significance |
| 5637 | c. 1800C>G | rs80357452   | Pathogenic | Uncertain significance |
| 5638 | c. 1799T>C | rs398122643  | Benign     | Uncertain significance |
| 5639 | c. 1799T>G | rs398122643  | Benign     | Uncertain significance |
| 5640 | c. 1796A>G |              | Benign     | Uncertain significance |
| 5641 | c. 1792T>G | rs1060504554 | Benign     | Uncertain significance |
| 5642 | c. 1787T>C |              | Benign     | Uncertain significance |
| 5643 | c. 1786C>T | rs80357371   | Benign     | Uncertain significance |
| 5644 | c. 1786C>G | rs80357371   | Benign     | Uncertain significance |
| 5645 | c. 1784A>G | rs876660455  | Benign     | Uncertain significance |
| 5646 | c. 1774A>C |              | Benign     | Uncertain significance |
| 5647 | c. 1773A>G | rs1555591259 | Pathogenic | Uncertain significance |
| 5648 | c. 1771A>G | rs1064795358 | Pathogenic | Uncertain significance |
| 5649 | c. 1769G>A | rs1060502349 | Pathogenic | Uncertain significance |
| 5650 | c. 1768A>G | rs80357454   | Pathogenic | Uncertain significance |
| 5651 | c. 1767C>A | rs587783039  | Benign     | Uncertain significance |
| 5652 | c. 1766G>T |              | Benign     | Uncertain significance |
| 5653 | c. 1766G>A | rs1567798335 | Pathogenic | Uncertain significance |
| 5654 | c. 1764C>G |              | Benign     | Uncertain significance |
| 5655 | c. 1762A>G | rs1169162396 | Benign     | Uncertain significance |
| 5656 | c. 1761A>G |              | Pathogenic | Uncertain significance |
| 5657 | c. 1760T>C |              | Benign     | Uncertain significance |
| 5658 | c. 1759A>G |              | Pathogenic | Uncertain significance |
| 5659 | c. 1757C>G | rs1064795270 | Benign     | Uncertain significance |
| 5660 | c. 1756C>T | rs80357153   | Benign     | Uncertain significance |
| 5661 | c. 1745C>A | rs786202386  | Benign     | Uncertain significance |
| 5662 | c. 1742A>G |              | Benign     | Uncertain significance |
| 5663 | c. 1733C>T | rs80356939   | Benign     | Uncertain significance |
| 5664 | c. 1733C>A | rs80356939   | Pathogenic | Uncertain significance |
| 5665 | c. 1729G>C |              | Benign     | Uncertain significance |
| 5666 | c. 1723G>A | rs397508902  | Benign     | Uncertain significance |
| 5667 | c. 1721T>C | rs1060502341 | Benign     | Uncertain significance |
| 5668 | c. 1718C>T | rs876660434  | Benign     | Uncertain significance |
| 5669 | c. 1717T>A |              | Benign     | Uncertain significance |

|      |            |              |            |                        |
|------|------------|--------------|------------|------------------------|
| 5670 | c. 1717T>C | rs876660448  | Benign     | Uncertain significance |
| 5671 | c. 1714G>A | rs730881473  | Pathogenic | Uncertain significance |
| 5672 | c. 1714G>C | rs730881473  | Benign     | Uncertain significance |
| 5673 | c. 1712T>G |              | Benign     | Uncertain significance |
| 5674 | c. 1712T>A | rs80357159   | Benign     | Uncertain significance |
| 5675 | c. 1711A>G | rs1310719199 | Benign     | Uncertain significance |
| 5676 | c. 1709C>A | rs879254020  | Benign     | Uncertain significance |
| 5677 | c. 1706A>G |              | Benign     | Uncertain significance |
| 5678 | c. 1706A>T | rs1060502329 | Pathogenic | Uncertain significance |
| 5679 | c. 1705A>G | rs587781315  | Pathogenic | Uncertain significance |
| 5680 | c. 1703C>G | rs80356910   | Benign     | Uncertain significance |
| 5681 | c. 1702C>T | rs755122577  | Benign     | Uncertain significance |
| 5682 | c. 1701T>G | rs1555591359 | Benign     | Uncertain significance |
| 5683 | c. 1696A>C |              | Benign     | Uncertain significance |
| 5684 | c. 1696A>G |              | Benign     | Uncertain significance |
| 5685 | c. 1690A>T | rs397507191  | Pathogenic | Uncertain significance |
| 5686 | c. 1686T>G | rs1268133978 | Pathogenic | Uncertain significance |
| 5687 | c. 1685T>C | rs1555591375 | Benign     | Uncertain significance |
| 5688 | c. 1684A>G | rs1567798727 | Pathogenic | Uncertain significance |
| 5689 | c. 1683T>C | rs1567798735 | Benign     | Uncertain significance |
| 5690 | c. 1679A>T | rs1567798739 | Benign     | Uncertain significance |
| 5691 | c. 1676G>A | rs80356980   | Pathogenic | Uncertain significance |
| 5692 | c. 1676G>T | rs80356980   | Pathogenic | Uncertain significance |
| 5693 | c. 1675G>A | rs1555591384 | Pathogenic | Uncertain significance |
| 5694 | c. 1672A>C | rs397507190  | Benign     | Uncertain significance |
| 5695 | c. 1670C>T | rs1567798771 | Benign     | Uncertain significance |
| 5696 | c. 1666A>G | rs587783041  | Pathogenic | Uncertain significance |
| 5697 | c. 1666A>C | rs587783041  | Benign     | Uncertain significance |
| 5698 | c. 1662G>C | rs876659028  | Benign     | Uncertain significance |
| 5699 | c. 1661A>G |              | Pathogenic | Uncertain significance |
| 5700 | c. 1658A>C | rs748431827  | Benign     | Uncertain significance |
| 5701 | c. 1655G>A | rs397508893  | Pathogenic | Uncertain significance |
| 5702 | c. 1654G>A | rs758598971  | Pathogenic | Uncertain significance |
| 5703 | c. 1651A>G | rs730881472  | Pathogenic | Uncertain significance |
| 5704 | c. 1649A>G | rs1064795217 | Benign     | Uncertain significance |
| 5705 | c. 1642A>G | rs80356981   | Pathogenic | Uncertain significance |
| 5706 | c. 1639A>T | rs1060502351 | Pathogenic | Uncertain significance |
| 5707 | c. 1639A>C | rs1060502351 | Benign     | Uncertain significance |
| 5708 | c. 1638G>A | rs1060502340 | Pathogenic | Uncertain significance |
| 5709 | c. 1636A>G | rs587782390  | Benign     | Uncertain significance |
| 5710 | c. 1631A>T | rs397508892  | Pathogenic | Uncertain significance |
| 5711 | c. 1631A>C | rs397508892  | Benign     | Uncertain significance |
| 5712 | c. 1624A>G | rs1555591461 | Benign     | Uncertain significance |
| 5713 | c. 1620G>C | rs1555591465 | Benign     | Uncertain significance |
| 5714 | c. 1618G>A | rs730881471  | Pathogenic | Uncertain significance |
| 5715 | c. 1616C>A | rs80357374   | Benign     | Uncertain significance |
| 5716 | c. 1607C>T |              | Benign     | Uncertain significance |
| 5717 | c. 1607C>A | rs398122638  | Benign     | Uncertain significance |
| 5718 | c. 1607C>G | rs398122638  | Benign     | Uncertain significance |
| 5719 | c. 1604G>C | rs1064793602 | Benign     | Uncertain significance |
| 5720 | c. 1603G>A | rs1555591488 | Benign     | Uncertain significance |
| 5721 | c. 1589A>T |              | Pathogenic | Uncertain significance |
| 5722 | c. 1589A>G | rs1555591512 | Benign     | Uncertain significance |
| 5723 | c. 1580A>G | rs774959350  | Benign     | Uncertain significance |

|      |            |              |            |                        |
|------|------------|--------------|------------|------------------------|
| 5724 | c. 1574T>C | rs879253902  | Benign     | Uncertain significance |
| 5725 | c. 1571C>T | rs80357333   | Pathogenic | Uncertain significance |
| 5726 | c. 1568T>G | rs397508885  | Benign     | Uncertain significance |
| 5727 | c. 1564G>A | rs80357453   | Pathogenic | Uncertain significance |
| 5728 | c. 1561G>C | rs80357122   | Benign     | Uncertain significance |
| 5729 | c. 1558A>C | rs1555591572 | Benign     | Uncertain significance |
| 5730 | c. 1555A>C | rs397508882  | Benign     | Uncertain significance |
| 5731 | c. 1554C>A | rs1064794487 | Pathogenic | Uncertain significance |
| 5732 | c. 1553T>C | rs1567799193 | Benign     | Uncertain significance |
| 5733 | c. 1552A>G |              | Pathogenic | Uncertain significance |
| 5734 | c. 1543G>A | rs886037990  | Pathogenic | Uncertain significance |
| 5735 | c. 1541C>G | rs56100707   | Benign     | Uncertain significance |
| 5736 | c. 1541C>T | rs56100707   | Benign     | Uncertain significance |
| 5737 | c. 1540C>A | rs1555591584 | Benign     | Uncertain significance |
| 5738 | c. 1538A>G | rs1356078500 | Pathogenic | Uncertain significance |
| 5739 | c. 1534C>G | rs41286294   | Benign     | Uncertain significance |
| 5740 | c. 1532G>T | rs397507188  | Benign     | Uncertain significance |
| 5741 | c. 1531G>A | rs1567799248 | Pathogenic | Uncertain significance |
| 5742 | c. 1523C>T | rs398122637  | Benign     | Uncertain significance |
| 5743 | c. 1520G>T | rs80357224   | Pathogenic | Uncertain significance |
| 5744 | c. 1514A>T | rs879254266  | Pathogenic | Uncertain significance |
| 5745 | c. 1514A>G | rs879254266  | Benign     | Uncertain significance |
| 5746 | c. 1510C>T | rs80357445   | Benign     | Uncertain significance |
| 5747 | c. 1505T>C |              | Benign     | Uncertain significance |
| 5748 | c. 1502A>C | rs113656989  | Benign     | Uncertain significance |
| 5749 | c. 1501A>C |              | Benign     | Uncertain significance |
| 5750 | c. 1501A>G | rs1064793883 | Pathogenic | Uncertain significance |
| 5751 | c. 1499A>G | rs1555591677 | Benign     | Uncertain significance |
| 5752 | c. 1498A>G | rs1555591681 | Benign     | Uncertain significance |
| 5753 | c. 1496C>T | rs876658285  | Benign     | Uncertain significance |
| 5754 | c. 1495A>C |              | Benign     | Uncertain significance |
| 5755 | c. 1490C>T | rs1555591693 | Benign     | Uncertain significance |
| 5756 | c. 1489C>A | rs1555591695 | Benign     | Uncertain significance |
| 5757 | c. 1486C>A | rs28897676   | Benign     | Uncertain significance |
| 5758 | c. 1484A>C | rs1567799498 | Benign     | Uncertain significance |
| 5759 | c. 1478T>C | rs1555591707 | Benign     | Uncertain significance |
| 5760 | c. 1477A>C |              | Benign     | Uncertain significance |
| 5761 | c. 1474A>G |              | Benign     | Uncertain significance |
| 5762 | c. 1472A>C | rs80357376   | Benign     | Uncertain significance |
| 5763 | c. 1472A>G | rs80357376   | Pathogenic | Uncertain significance |
| 5764 | c. 1471C>G | rs62625303   | Benign     | Uncertain significance |
| 5765 | c. 1469C>T | rs876658291  | Benign     | Uncertain significance |
| 5766 | c. 1465G>A | rs80357167   | Pathogenic | Uncertain significance |
| 5767 | c. 1460T>G | rs748812609  | Benign     | Uncertain significance |
| 5768 | c. 1460T>C | rs748812609  | Benign     | Uncertain significance |
| 5769 | c. 1458T>G | rs80357400   | Benign     | Uncertain significance |
| 5770 | c. 1450G>A | rs80357304   | Pathogenic | Uncertain significance |
| 5771 | c. 1448T>C | rs80357489   | Benign     | Uncertain significance |
| 5772 | c. 1441C>A |              | Pathogenic | Uncertain significance |
| 5773 | c. 1436A>G |              | Benign     | Uncertain significance |
| 5774 | c. 1435G>C |              | Benign     | Uncertain significance |
| 5775 | c. 1435G>A | rs1064794100 | Pathogenic | Uncertain significance |
| 5776 | c. 1424G>A |              | Pathogenic | Uncertain significance |
| 5777 | c. 1423A>G |              | Benign     | Uncertain significance |

|      |            |              |            |                        |
|------|------------|--------------|------------|------------------------|
| 5778 | c. 1423A>T | rs1064794047 | Pathogenic | Uncertain significance |
| 5779 | c. 1418A>C |              | Benign     | Uncertain significance |
| 5780 | c. 1412T>C |              | Benign     | Uncertain significance |
| 5781 | c. 1409G>A | rs1567799713 | Pathogenic | Uncertain significance |
| 5782 | c. 1408A>G |              | Benign     | Uncertain significance |
| 5783 | c. 1406C>G | rs80357073   | Benign     | Uncertain significance |
| 5784 | c. 1396C>G | rs80356964   | Pathogenic | Uncertain significance |
| 5785 | c. 1394A>G | rs876659885  | Pathogenic | Uncertain significance |
| 5786 | c. 1391C>T | rs62625301   | Benign     | Uncertain significance |
| 5787 | c. 1387A>G | rs1135401844 | Benign     | Uncertain significance |
| 5788 | c. 1384G>A | rs80357221   | Pathogenic | Uncertain significance |
| 5789 | c. 1381T>C | rs62625300   | Benign     | Uncertain significance |
| 5790 | c. 1379T>C |              | Benign     | Uncertain significance |
| 5791 | c. 1379T>G | rs398122634  | Benign     | Uncertain significance |
| 5792 | c. 1374C>A | rs879253999  | Benign     | Uncertain significance |
| 5793 | c. 1367T>C | rs80357360   | Benign     | Uncertain significance |
| 5794 | c. 1363A>G |              | Pathogenic | Uncertain significance |
| 5795 | c. 1361G>A | rs80357181   | Pathogenic | Uncertain significance |
| 5796 | c. 1355T>C | rs878854932  | Benign     | Uncertain significance |
| 5797 | c. 1350A>T |              | Benign     | Uncertain significance |
| 5798 | c. 1345T>C |              | Benign     | Uncertain significance |
| 5799 | c. 1343A>C |              | Benign     | Uncertain significance |
| 5800 | c. 1342C>T | rs786203578  | Benign     | Uncertain significance |
| 5801 | c. 1339G>A | rs587782784  | Benign     | Uncertain significance |
| 5802 | c. 1336A>G | rs587781715  | Benign     | Uncertain significance |
| 5803 | c. 1334A>G |              | Benign     | Uncertain significance |
| 5804 | c. 1333G>C | rs80356915   | Benign     | Uncertain significance |
| 5805 | c. 1332T>G | rs1555591925 | Benign     | Uncertain significance |
| 5806 | c. 1331G>A |              | Pathogenic | Uncertain significance |
| 5807 | c. 1324T>A | rs876660734  | Benign     | Uncertain significance |
| 5808 | c. 1324T>C | rs876660734  | Benign     | Uncertain significance |
| 5809 | c. 1323A>G | rs1555591935 | Pathogenic | Uncertain significance |
| 5810 | c. 1322T>C |              | Benign     | Uncertain significance |
| 5811 | c. 1321A>G | rs1567800029 | Benign     | Uncertain significance |
| 5812 | c. 1319T>C | rs273897656  | Benign     | Uncertain significance |
| 5813 | c. 1316C>G |              | Benign     | Uncertain significance |
| 5814 | c. 1315G>A |              | Benign     | Uncertain significance |
| 5815 | c. 1315G>T | rs1064794098 | Benign     | Uncertain significance |
| 5816 | c. 1313A>C | rs730881470  | Benign     | Uncertain significance |
| 5817 | c. 1310A>G | rs80357255   | Pathogenic | Uncertain significance |
| 5818 | c. 1310A>C | rs80357255   | Benign     | Uncertain significance |
| 5819 | c. 1309C>T | rs759878392  | Benign     | Uncertain significance |
| 5820 | c. 1300A>C |              | Benign     | Uncertain significance |
| 5821 | c. 1300A>G | rs786203753  | Pathogenic | Uncertain significance |
| 5822 | c. 1295T>C | rs369394098  | Benign     | Uncertain significance |
| 5823 | c. 1291T>A | rs960381964  | Benign     | Uncertain significance |
| 5824 | c. 1289A>G |              | Benign     | Uncertain significance |
| 5825 | c. 1286T>G | rs775869160  | Benign     | Uncertain significance |
| 5826 | c. 1286T>C | rs775869160  | Benign     | Uncertain significance |
| 5827 | c. 1270G>A | rs763051683  | Pathogenic | Uncertain significance |
| 5828 | c. 1270G>C | rs763051683  | Benign     | Uncertain significance |
| 5829 | c. 1265A>T | rs1567800230 | Benign     | Uncertain significance |
| 5830 | c. 1264T>C | rs764186025  | Benign     | Uncertain significance |
| 5831 | c. 1261G>A | rs80357046   | Pathogenic | Uncertain significance |

|      |            |              |            |                        |
|------|------------|--------------|------------|------------------------|
| 5832 | c. 1259A>G | rs730881442  | Benign     | Uncertain significance |
| 5833 | c. 1258G>C |              | Benign     | Uncertain significance |
| 5834 | c. 1258G>A | rs80357488   | Pathogenic | Uncertain significance |
| 5835 | c. 1256T>G | rs398122628  | Benign     | Uncertain significance |
| 5836 | c. 1255G>A | rs876658873  | Pathogenic | Uncertain significance |
| 5837 | c. 1255G>C | rs876658873  | Pathogenic | Uncertain significance |
| 5838 | c. 1251T>G | rs80357197   | Benign     | Uncertain significance |
| 5839 | c. 1244T>C | rs1064796031 | Benign     | Uncertain significance |
| 5840 | c. 1243G>T | rs587782770  | Benign     | Uncertain significance |
| 5841 | c. 1241A>C | rs1555592086 | Benign     | Uncertain significance |
| 5842 | c. 1234G>A | rs587776478  | Pathogenic | Uncertain significance |
| 5843 | c. 1232A>T | rs730881469  | Benign     | Uncertain significance |
| 5844 | c. 1231G>A | rs80357301   | Pathogenic | Uncertain significance |
| 5845 | c. 1228G>A | rs779974365  | Pathogenic | Uncertain significance |
| 5846 | c. 1226T>C | rs786202539  | Benign     | Uncertain significance |
| 5847 | c. 1208C>T | rs80356934   | Benign     | Uncertain significance |
| 5848 | c. 1207T>G |              | Benign     | Uncertain significance |
| 5849 | c. 1207T>C | rs1555592200 | Benign     | Uncertain significance |
| 5850 | c. 1206G>C |              | Benign     | Uncertain significance |
| 5851 | c. 1205A>T | rs1555592216 | Pathogenic | Uncertain significance |
| 5852 | c. 1204G>A |              | Pathogenic | Uncertain significance |
| 5853 | c. 1202G>C | rs397507184  | Pathogenic | Uncertain significance |
| 5854 | c. 1201G>A | rs1555592242 | Pathogenic | Uncertain significance |
| 5855 | c. 1199A>G | rs1555592245 | Benign     | Uncertain significance |
| 5856 | c. 1196A>G | rs587780794  | Benign     | Uncertain significance |
| 5857 | c. 1193C>T |              | Benign     | Uncertain significance |
| 5858 | c. 1190A>T |              | Benign     | Uncertain significance |
| 5859 | c. 1187A>T | rs1555592280 | Benign     | Uncertain significance |
| 5860 | c. 1187A>G | rs1555592280 | Benign     | Uncertain significance |
| 5861 | c. 1186G>A | rs786203145  | Pathogenic | Uncertain significance |
| 5862 | c. 1181G>A |              | Benign     | Uncertain significance |
| 5863 | c. 1181G>T | rs1555592295 | Pathogenic | Uncertain significance |
| 5864 | c. 1175T>C | rs777305766  | Benign     | Uncertain significance |
| 5865 | c. 1163G>C | rs786203567  | Benign     | Uncertain significance |
| 5866 | c. 1160C>G | rs1567800665 | Benign     | Uncertain significance |
| 5867 | c. 1155G>T | rs876660558  | Benign     | Uncertain significance |
| 5868 | c. 1147A>C |              | Benign     | Uncertain significance |
| 5869 | c. 1144G>T |              | Benign     | Uncertain significance |
| 5870 | c. 1142A>G | rs1555592379 | Benign     | Uncertain significance |
| 5871 | c. 1139A>G | rs876659193  | Pathogenic | Uncertain significance |
| 5872 | c. 1139A>C | rs876659193  | Benign     | Uncertain significance |
| 5873 | c. 1136T>C | rs1567800757 | Benign     | Uncertain significance |
| 5874 | c. 1135A>G | rs864622723  | Pathogenic | Uncertain significance |
| 5875 | c. 1134C>A | rs863224752  | Benign     | Uncertain significance |
| 5876 | c. 1132A>G | rs1555592404 | Pathogenic | Uncertain significance |
| 5877 | c. 1131C>G | rs786203434  | Benign     | Uncertain significance |
| 5878 | c. 1131C>A | rs786203434  | Benign     | Uncertain significance |
| 5879 | c. 1130G>A | rs80357398   | Pathogenic | Uncertain significance |
| 5880 | c. 1129A>G | rs1555592415 | Pathogenic | Uncertain significance |
| 5881 | c. 1127A>G | rs80356976   | Benign     | Uncertain significance |
| 5882 | c. 1121C>T | rs80357235   | Benign     | Uncertain significance |
| 5883 | c. 1114T>C | rs1306111238 | Benign     | Uncertain significance |
| 5884 | c. 1114T>A | rs1306111238 | Benign     | Uncertain significance |
| 5885 | c. 1108G>A |              | Pathogenic | Uncertain significance |



|      |            |              |            |                        |
|------|------------|--------------|------------|------------------------|
| 5886 | c. 1108G>C | rs1567800850 | Benign     | Uncertain significance |
| 5887 | c. 1106A>T | rs80357416   | Benign     | Uncertain significance |
| 5888 | c. 1106A>G | rs80357416   | Benign     | Uncertain significance |
| 5889 | c. 1099A>G | rs878854929  | Pathogenic | Uncertain significance |
| 5890 | c. 1097A>T | rs587781769  | Benign     | Uncertain significance |
| 5891 | c. 1096G>C | rs1289961661 | Benign     | Uncertain significance |
| 5892 | c. 1090C>A | rs876660309  | Benign     | Uncertain significance |
| 5893 | c. 1082C>T | rs397508833  | Benign     | Uncertain significance |
| 5894 | c. 1078T>C | rs587782790  | Benign     | Uncertain significance |
| 5895 | c. 1075C>T | rs767666190  | Benign     | Uncertain significance |
| 5896 | c. 1069A>G |              | Benign     | Uncertain significance |
| 5897 | c. 1064A>G | rs80357246   | Benign     | Uncertain significance |
| 5898 | c. 1061A>G | rs1555592577 | Benign     | Uncertain significance |
| 5899 | c. 1061A>T | rs1555592577 | Benign     | Uncertain significance |
| 5900 | c. 1059G>C | rs80356935   | Benign     | Uncertain significance |
| 5901 | c. 1054G>A | rs80357472   | Pathogenic | Uncertain significance |
| 5902 | c. 1052A>T |              | Pathogenic | Uncertain significance |
| 5903 | c. 1043G>A | rs752198747  | Pathogenic | Uncertain significance |
| 5904 | c. 1042T>C | rs786201928  | Benign     | Uncertain significance |
| 5905 | c. 1040T>A | rs757987511  | Benign     | Uncertain significance |
| 5906 | c. 1037C>A | rs1555592620 | Pathogenic | Uncertain significance |
| 5907 | c. 1036C>G | rs80357015   | Pathogenic | Uncertain significance |
| 5908 | c. 1033G>T | rs80356961   | Pathogenic | Uncertain significance |
| 5909 | c. 1031C>A | rs876658636  | Benign     | Uncertain significance |
| 5910 | c. 1031C>T | rs876658636  | Benign     | Uncertain significance |
| 5911 | c. 1030G>A | rs79727659   | Pathogenic | Uncertain significance |
| 5912 | c. 1025T>A |              | Benign     | Uncertain significance |
| 5913 | c. 1025T>C | rs1555592634 | Benign     | Uncertain significance |
| 5914 | c. 1022A>C | rs1567801162 | Benign     | Uncertain significance |
| 5915 | c. 1021G>T | rs756987689  | Pathogenic | Uncertain significance |
| 5916 | c. 1021G>A | rs756987689  | Pathogenic | Uncertain significance |
| 5917 | c. 1017G>T | rs863224416  | Benign     | Uncertain significance |
| 5918 | c. 1016A>C | rs587781737  | Benign     | Uncertain significance |
| 5919 | c. 1012A>G | rs397508826  | Benign     | Uncertain significance |
| 5920 | c. 1007C>G |              | Benign     | Uncertain significance |
| 5921 | c. 1005C>A | rs876660367  | Benign     | Uncertain significance |
| 5922 | c. 1000C>A | rs1555592700 | Benign     | Uncertain significance |
| 5923 | c. 998C>G  | rs431825420  | Benign     | Uncertain significance |
| 5924 | c. 998C>T  | rs431825420  | Benign     | Uncertain significance |
| 5925 | c. 994C>G  |              | Benign     | Uncertain significance |
| 5926 | c. 993G>C  | rs80357140   | Benign     | Uncertain significance |
| 5927 | c. 988G>A  | rs397507259  | Pathogenic | Uncertain significance |
| 5928 | c. 985A>T  | rs786203732  | Pathogenic | Uncertain significance |
| 5929 | c. 983G>A  |              | Pathogenic | Uncertain significance |
| 5930 | c. 982T>G  | rs748156170  | Benign     | Uncertain significance |
| 5931 | c. 982T>C  | rs748156170  | Benign     | Uncertain significance |
| 5932 | c. 976G>C  |              | Benign     | Uncertain significance |
| 5933 | c. 971G>A  | rs1462728426 | Pathogenic | Uncertain significance |
| 5934 | c. 967G>A  |              | Pathogenic | Uncertain significance |
| 5935 | c. 954T>A  | rs1135401826 | Benign     | Uncertain significance |
| 5936 | c. 953A>G  | rs776278453  | Benign     | Uncertain significance |
| 5937 | c. 948C>G  | rs1555592782 | Benign     | Uncertain significance |
| 5938 | c. 947G>A  | rs1465372282 | Pathogenic | Uncertain significance |
| 5939 | c. 945G>C  |              | Benign     | Uncertain significance |



|      |           |              |            |                        |
|------|-----------|--------------|------------|------------------------|
| 5940 | c. 944G>A | rs1555592792 | Benign     | Uncertain significance |
| 5941 | c. 943A>G | rs80357050   | Benign     | Uncertain significance |
| 5942 | c. 941C>T | rs863224766  | Pathogenic | Uncertain significance |
| 5943 | c. 932C>T | rs1301795658 | Benign     | Uncertain significance |
| 5944 | c. 929A>C |              | Benign     | Uncertain significance |
| 5945 | c. 926A>C | rs80356877   | Benign     | Uncertain significance |
| 5946 | c. 925A>G | rs879255498  | Benign     | Uncertain significance |
| 5947 | c. 924C>T | rs1555592819 | Pathogenic | Uncertain significance |
| 5948 | c. 923G>A | rs561998108  | Pathogenic | Uncertain significance |
| 5949 | c. 923G>C | rs561998108  | Benign     | Uncertain significance |
| 5950 | c. 922A>G | rs55767801   | Benign     | Uncertain significance |
| 5951 | c. 919A>G | rs1216516227 | Pathogenic | Uncertain significance |
| 5952 | c. 914G>T |              | Benign     | Uncertain significance |
| 5953 | c. 914G>A | rs751124745  | Pathogenic | Uncertain significance |
| 5954 | c. 910T>C | rs1567801570 | Benign     | Uncertain significance |
| 5955 | c. 903G>T |              | Benign     | Uncertain significance |
| 5956 | c. 902A>G | rs878854965  | Benign     | Uncertain significance |
| 5957 | c. 900A>C | rs80356861   | Benign     | Uncertain significance |
| 5958 | c. 898G>A | rs886040330  | Pathogenic | Uncertain significance |
| 5959 | c. 896T>C |              | Benign     | Uncertain significance |
| 5960 | c. 894T>C |              | Benign     | Uncertain significance |
| 5961 | c. 890T>A | rs80356924   | Benign     | Uncertain significance |
| 5962 | c. 889A>G | rs80357196   | Benign     | Uncertain significance |
| 5963 | c. 885C>G |              | Benign     | Uncertain significance |
| 5964 | c. 884A>G | rs772684048  | Benign     | Uncertain significance |
| 5965 | c. 881A>G | rs1555592934 | Benign     | Uncertain significance |
| 5966 | c. 880A>G | rs1567801705 | Pathogenic | Uncertain significance |
| 5967 | c. 878C>G | rs747172803  | Benign     | Uncertain significance |
| 5968 | c. 878C>T | rs747172803  | Benign     | Uncertain significance |
| 5969 | c. 877A>C | rs1555592945 | Benign     | Uncertain significance |
| 5970 | c. 869T>C | rs730881468  | Benign     | Uncertain significance |
| 5971 | c. 866G>C |              | Benign     | Uncertain significance |
| 5972 | c. 866G>A | rs776999497  | Benign     | Uncertain significance |
| 5973 | c. 862A>G |              | Pathogenic | Uncertain significance |
| 5974 | c. 861C>G | rs1064794692 | Benign     | Uncertain significance |
| 5975 | c. 852G>C |              | Benign     | Uncertain significance |
| 5976 | c. 851A>G | rs80357039   | Pathogenic | Uncertain significance |
| 5977 | c. 845C>T | rs786203027  | Benign     | Uncertain significance |
| 5978 | c. 842G>C |              | Benign     | Uncertain significance |
| 5979 | c. 841A>G | rs1300771163 | Pathogenic | Uncertain significance |
| 5980 | c. 839C>A |              | Benign     | Uncertain significance |
| 5981 | c. 836A>T | rs80357482   | Benign     | Uncertain significance |
| 5982 | c. 836A>G | rs80357482   | Pathogenic | Uncertain significance |
| 5983 | c. 835C>T |              | Benign     | Uncertain significance |
| 5984 | c. 827C>A | rs80357436   | Benign     | Uncertain significance |
| 5985 | c. 821G>A |              | Pathogenic | Uncertain significance |
| 5986 | c. 820T>C |              | Benign     | Uncertain significance |
| 5987 | c. 817C>T |              | Benign     | Uncertain significance |
| 5988 | c. 812T>C | rs753099787  | Benign     | Uncertain significance |
| 5989 | c. 812T>G | rs753099787  | Benign     | Uncertain significance |
| 5990 | c. 811G>T | rs80357244   | Benign     | Uncertain significance |
| 5991 | c. 811G>C | rs80357244   | Benign     | Uncertain significance |
| 5992 | c. 809A>G |              | Benign     | Uncertain significance |
| 5993 | c. 808C>T |              | Benign     | Uncertain significance |

|      |               |              |            |                        |
|------|---------------|--------------|------------|------------------------|
| 5994 | c. 804C>G     | rs771076131  | Benign     | Uncertain significance |
| 5995 | c. 803A>G     |              | Benign     | Uncertain significance |
| 5996 | c. 802A>G     | rs1555593066 | Benign     | Uncertain significance |
| 5997 | c. 799T>C     | rs587781496  | Benign     | Uncertain significance |
| 5998 | c. 792T>G     | rs80357214   | Benign     | Uncertain significance |
| 5999 | c. 788G>A     | rs397509319  | Pathogenic | Uncertain significance |
| 6000 | c. 787G>A     | rs397509318  | Pathogenic | Uncertain significance |
| 6001 | c. 785A>G     | rs1555593115 | Pathogenic | Uncertain significance |
| 6002 | c. 779A>G     |              | Benign     | Uncertain significance |
| 6003 | c. 778A>C     | rs786202263  | Benign     | Uncertain significance |
| 6004 | c. 773C>G     | rs80357225   | Benign     | Uncertain significance |
| 6005 | c. 769C>T     |              | Benign     | Uncertain significance |
| 6006 | c. 768G>C     |              | Benign     | Uncertain significance |
| 6007 | c. 767G>A     | rs11658785   | Pathogenic | Uncertain significance |
| 6008 | c. 766A>T     | rs587781833  | Pathogenic | Uncertain significance |
| 6009 | c. 765G>C     |              | Benign     | Uncertain significance |
| 6010 | c. 758C>T     | rs1555593177 | Pathogenic | Uncertain significance |
| 6011 | c. 757G>A     | rs80357293   | Pathogenic | Uncertain significance |
| 6012 | c. 748G>A     | rs1567802220 | Pathogenic | Uncertain significance |
| 6013 | c. 745A>T     | rs397507256  | Benign     | Uncertain significance |
| 6014 | c. 743C>A     | rs80357062   | Benign     | Uncertain significance |
| 6015 | c. 742A>G     | rs879255288  | Benign     | Uncertain significance |
| 6016 | c. 735T>A     | rs1567802284 | Benign     | Uncertain significance |
| 6017 | c. 734A>T     | rs80356865   | Benign     | Uncertain significance |
| 6018 | c. 733G>C     |              | Benign     | Uncertain significance |
| 6019 | c. 733G>T     | rs147519994  | Pathogenic | Uncertain significance |
| 6020 | c. 729T>G     | rs730881467  | Benign     | Uncertain significance |
| 6021 | c. 727A>G     | rs587782123  | Pathogenic | Uncertain significance |
| 6022 | c. 725G>A     |              | Pathogenic | Uncertain significance |
| 6023 | c. 724A>G     | rs1555593258 | Pathogenic | Uncertain significance |
| 6024 | c. 722C>T     | rs80357351   | Benign     | Uncertain significance |
| 6025 | c. 721C>A     | rs1555593260 | Benign     | Uncertain significance |
| 6026 | c. 716A>T     | rs80357396   | Benign     | Uncertain significance |
| 6027 | c. 715C>T     |              | Benign     | Uncertain significance |
| 6028 | c. 713A>G     | rs587782094  | Benign     | Uncertain significance |
| 6029 | c. 710A>C     |              | Benign     | Uncertain significance |
| 6030 | c. 707C>G     | rs80356990   | Benign     | Uncertain significance |
| 6031 | c. 704A>G     | rs1555593283 | Benign     | Uncertain significance |
| 6032 | c. 701C>A     | rs1555593290 | Benign     | Uncertain significance |
| 6033 | c. 701C>T     | rs1555593290 | Benign     | Uncertain significance |
| 6034 | c. 700A>G     |              | Benign     | Uncertain significance |
| 6035 | c. 695A>T     | rs398122708  | Benign     | Uncertain significance |
| 6036 | c. 694G>T     | rs55975699   | Pathogenic | Uncertain significance |
| 6037 | c. 686C>T     |              | Benign     | Uncertain significance |
| 6038 | c. 683T>A     | rs191872612  | Pathogenic | Uncertain significance |
| 6039 | c. 677G>C     |              | Benign     | Uncertain significance |
| 6040 | c. 677G>A     | rs1376262238 | Pathogenic | Uncertain significance |
| 6041 | c. 671C>T     | rs1060502335 | Benign     | Uncertain significance |
| 6042 | c. 671-98G>C  | rs273902785  | Benign     | Uncertain significance |
| 6043 | c. 671-141T>A | rs273902782  | Benign     | Uncertain significance |
| 6044 | c. 670G>A     | rs431825419  | Pathogenic | Uncertain significance |
| 6045 | c. 665A>C     |              | Benign     | Uncertain significance |
| 6046 | c. 665A>G     | rs398122705  | Benign     | Uncertain significance |
| 6047 | c. 662C>T     |              | Pathogenic | Uncertain significance |

|      |             |              |            |                        |
|------|-------------|--------------|------------|------------------------|
| 6048 | c. 659C>G   | rs431825418  | Benign     | Uncertain significance |
| 6049 | c. 655G>C   | rs273902779  | Benign     | Uncertain significance |
| 6050 | c. 650G>C   | rs774284145  | Benign     | Uncertain significance |
| 6051 | c. 646A>G   | rs398122704  | Benign     | Uncertain significance |
| 6052 | c. 640G>T   | rs786203797  | Pathogenic | Uncertain significance |
| 6053 | c. 640G>A   | rs786203797  | Benign     | Uncertain significance |
| 6054 | c. 639G>T   | rs1131692078 | Benign     | Uncertain significance |
| 6055 | c. 638G>A   | rs1567803140 | Pathogenic | Uncertain significance |
| 6056 | c. 637A>G   | rs80357081   | Pathogenic | Uncertain significance |
| 6057 | c. 631G>A   | rs1192717688 | Benign     | Uncertain significance |
| 6058 | c. 628C>G   |              | Pathogenic | Uncertain significance |
| 6059 | c. 626C>G   |              | Benign     | Uncertain significance |
| 6060 | c. 626C>T   | rs201596327  | Benign     | Uncertain significance |
| 6061 | c. 625C>T   | rs730881466  | Benign     | Uncertain significance |
| 6062 | c. 619A>G   |              | Benign     | Uncertain significance |
| 6063 | c. 617A>C   | rs879255494  | Benign     | Uncertain significance |
| 6064 | c. 616C>G   | rs397509301  | Benign     | Uncertain significance |
| 6065 | c. 616C>T   | rs397509301  | Benign     | Uncertain significance |
| 6066 | c. 611T>G   |              | Benign     | Uncertain significance |
| 6067 | c. 607G>A   | rs398122703  | Pathogenic | Uncertain significance |
| 6068 | c. 605A>C   | rs1060502366 | Benign     | Uncertain significance |
| 6069 | c. 604C>A   |              | Pathogenic | Uncertain significance |
| 6070 | c. 601G>A   | rs80357109   | Pathogenic | Uncertain significance |
| 6071 | c. 599G>A   |              | Pathogenic | Uncertain significance |
| 6072 | c. 595G>A   | rs1555593622 | Pathogenic | Uncertain significance |
| 6073 | c. 594-1G>T | rs757781708  | Benign     | Uncertain significance |
| 6074 | c. 593G>A   |              | Pathogenic | Uncertain significance |
| 6075 | c. 587A>T   | rs1555594039 | Benign     | Uncertain significance |
| 6076 | c. 586T>C   |              | Benign     | Uncertain significance |
| 6077 | c. 581C>T   |              | Pathogenic | Uncertain significance |
| 6078 | c. 577A>G   | rs878854962  | Pathogenic | Uncertain significance |
| 6079 | c. 566A>G   | rs1555594067 | Benign     | Uncertain significance |
| 6080 | c. 564A>C   |              | Benign     | Uncertain significance |
| 6081 | c. 562G>A   | rs1555594069 | Pathogenic | Uncertain significance |
| 6082 | c. 557C>T   | rs55688530   | Benign     | Uncertain significance |
| 6083 | c. 556T>G   | rs397509298  | Pathogenic | Uncertain significance |
| 6084 | c. 551C>T   | rs878854961  | Benign     | Uncertain significance |
| 6085 | c. 550T>A   | rs1064795269 | Benign     | Uncertain significance |
| 6086 | c. 548G>T   | rs1555594081 | Pathogenic | Uncertain significance |
| 6087 | c. 548-4T>C |              | Benign     | Uncertain significance |
| 6088 | c. 548-6T>C |              | Benign     | Uncertain significance |
| 6089 | c. 547G>C   | rs1135401931 | Benign     | Uncertain significance |
| 6090 | c. 546G>T   | rs1464752950 | Benign     | Uncertain significance |
| 6091 | c. 544T>A   | rs1060502339 | Benign     | Uncertain significance |
| 6092 | c. 539T>C   | rs1567805965 | Benign     | Uncertain significance |
| 6093 | c. 538A>G   |              | Benign     | Uncertain significance |
| 6094 | c. 538A>C   | rs1555594803 | Benign     | Uncertain significance |
| 6095 | c. 535T>C   | rs587781761  | Benign     | Uncertain significance |
| 6096 | c. 533T>A   | rs876660085  | Benign     | Uncertain significance |
| 6097 | c. 532G>C   | rs1259369962 | Benign     | Uncertain significance |
| 6098 | c. 530C>T   |              | Benign     | Uncertain significance |
| 6099 | c. 530C>G   | rs753940026  | Benign     | Uncertain significance |
| 6100 | c. 529T>A   | rs1555594827 | Benign     | Uncertain significance |
| 6101 | c. 527C>T   | rs587782747  | Benign     | Uncertain significance |

|      |             |              |            |                        |
|------|-------------|--------------|------------|------------------------|
| 6102 | c. 527C>G   | rs587782747  | Benign     | Uncertain significance |
| 6103 | c. 523A>G   | rs1567806027 | Benign     | Uncertain significance |
| 6104 | c. 521A>G   | rs1567806035 | Pathogenic | Uncertain significance |
| 6105 | c. 521A>C   | rs1567806035 | Benign     | Uncertain significance |
| 6106 | c. 515A>G   | rs1555594863 | Benign     | Uncertain significance |
| 6107 | c. 506A>C   | rs587780803  | Benign     | Uncertain significance |
| 6108 | c. 503A>C   | rs273901743  | Benign     | Uncertain significance |
| 6109 | c. 502A>G   | rs886040263  | Benign     | Uncertain significance |
| 6110 | c. 499A>G   |              | Benign     | Uncertain significance |
| 6111 | c. 493C>G   |              | Benign     | Uncertain significance |
| 6112 | c. 491C>T   | rs1555594889 | Benign     | Uncertain significance |
| 6113 | c. 490A>C   | rs80357384   | Benign     | Uncertain significance |
| 6114 | c. 488G>C   | rs1369043501 | Benign     | Uncertain significance |
| 6115 | c. 485T>G   |              | Benign     | Uncertain significance |
| 6116 | c. 484G>A   | rs55816927   | Pathogenic | Uncertain significance |
| 6117 | c. 483T>G   | rs1060504575 | Benign     | Uncertain significance |
| 6118 | c. 478G>A   | rs62625285   | Pathogenic | Uncertain significance |
| 6119 | c. 470C>G   | rs80357045   | Benign     | Uncertain significance |
| 6120 | c. 469T>C   | rs80356897   | Benign     | Uncertain significance |
| 6121 | c. 466C>T   | rs587778115  | Benign     | Uncertain significance |
| 6122 | c. 466C>A   | rs587778115  | Benign     | Uncertain significance |
| 6123 | c. 465A>T   | rs864622260  | Benign     | Uncertain significance |
| 6124 | c. 465A>C   | rs864622260  | Benign     | Uncertain significance |
| 6125 | c. 460G>A   | rs1064793318 | Pathogenic | Uncertain significance |
| 6126 | c. 458G>A   |              | Benign     | Uncertain significance |
| 6127 | c. 457A>G   | rs28897674   | Pathogenic | Uncertain significance |
| 6128 | c. 455T>C   | rs80357275   | Benign     | Uncertain significance |
| 6129 | c. 445G>A   | rs876658381  | Benign     | Uncertain significance |
| 6130 | c. 442-1G>A |              | Pathogenic | Uncertain significance |
| 6131 | c. 441+4A>G |              | Benign     | Uncertain significance |
| 6132 | c. 441G>T   | rs748876625  | Benign     | Uncertain significance |
| 6133 | c. 439T>G   | rs794727800  | Benign     | Uncertain significance |
| 6134 | c. 437C>T   | rs1060502358 | Benign     | Uncertain significance |
| 6135 | c. 436T>C   | rs1555596290 | Benign     | Uncertain significance |
| 6136 | c. 434C>T   | rs886041143  | Benign     | Uncertain significance |
| 6137 | c. 433C>A   |              | Benign     | Uncertain significance |
| 6138 | c. 429A>C   | rs397507228  | Benign     | Uncertain significance |
| 6139 | c. 427G>C   | rs80356991   | Benign     | Uncertain significance |
| 6140 | c. 424C>G   | rs397509156  | Benign     | Uncertain significance |
| 6141 | c. 420T>G   | rs730881448  | Benign     | Uncertain significance |
| 6142 | c. 419G>A   | rs1064793055 | Benign     | Uncertain significance |
| 6143 | c. 416A>G   | rs786202213  | Pathogenic | Uncertain significance |
| 6144 | c. 413T>C   | rs200449040  | Benign     | Uncertain significance |
| 6145 | c. 412C>G   | rs587782724  | Benign     | Uncertain significance |
| 6146 | c. 410T>A   | rs751078452  | Benign     | Uncertain significance |
| 6147 | c. 410T>C   | rs751078452  | Benign     | Uncertain significance |
| 6148 | c. 401C>A   |              | Benign     | Uncertain significance |
| 6149 | c. 400G>A   |              | Pathogenic | Uncertain significance |
| 6150 | c. 398G>T   |              | Benign     | Uncertain significance |
| 6151 | c. 395A>G   |              | Benign     | Uncertain significance |
| 6152 | c. 391A>G   | rs80357207   | Pathogenic | Uncertain significance |
| 6153 | c. 389A>G   | rs56055578   | Pathogenic | Uncertain significance |
| 6154 | c. 386G>T   | rs764231119  | Benign     | Uncertain significance |
| 6155 | c. 385G>T   | rs1555596362 | Benign     | Uncertain significance |

|      |           |              |            |                        |
|------|-----------|--------------|------------|------------------------|
| 6156 | c. 385G>A | rs1555596362 | Pathogenic | Uncertain significance |
| 6157 | c. 383T>C | rs1064793053 | Benign     | Uncertain significance |
| 6158 | c. 382A>G | rs864622124  | Pathogenic | Uncertain significance |
| 6159 | c. 381T>G | rs945168715  | Benign     | Uncertain significance |
| 6160 | c. 380G>T | rs80357189   | Benign     | Uncertain significance |
| 6161 | c. 380G>A | rs80357189   | Benign     | Uncertain significance |
| 6162 | c. 373A>G | rs587776489  | Pathogenic | Uncertain significance |
| 6163 | c. 372C>G | rs273900715  | Pathogenic | Uncertain significance |
| 6164 | c. 370A>C | rs80357448   | Benign     | Uncertain significance |
| 6165 | c. 364G>C | rs1555596409 | Benign     | Uncertain significance |
| 6166 | c. 362A>G | rs1555596419 | Benign     | Uncertain significance |
| 6167 | c. 359A>G | rs587781491  | Benign     | Uncertain significance |
| 6168 | c. 358G>A | rs587782882  | Pathogenic | Uncertain significance |
| 6169 | c. 352C>G | rs876659315  | Benign     | Uncertain significance |
| 6170 | c. 350A>T |              | Benign     | Uncertain significance |
| 6171 | c. 349C>T | rs1042173379 | Benign     | Uncertain significance |
| 6172 | c. 347A>G |              | Benign     | Uncertain significance |
| 6173 | c. 344C>T | rs876659528  | Benign     | Uncertain significance |
| 6174 | c. 343C>T | rs1468589409 | Benign     | Uncertain significance |
| 6175 | c. 343C>A | rs1468589409 | Benign     | Uncertain significance |
| 6176 | c. 341C>G | rs786202620  | Benign     | Uncertain significance |
| 6177 | c. 339C>G | rs587779367  | Benign     | Uncertain significance |
| 6178 | c. 338A>G | rs587780800  | Benign     | Uncertain significance |
| 6179 | c. 334A>G | rs587782017  | Benign     | Uncertain significance |
| 6180 | c. 333A>C | rs1567810451 | Benign     | Uncertain significance |
| 6181 | c. 332A>T | rs80357312   | Pathogenic | Uncertain significance |
| 6182 | c. 332A>C | rs80357312   | Benign     | Uncertain significance |
| 6183 | c. 331G>A |              | Benign     | Uncertain significance |
| 6184 | c. 328A>G | rs878854946  | Benign     | Uncertain significance |
| 6185 | c. 325A>G | rs1555596474 | Benign     | Uncertain significance |
| 6186 | c. 319T>C |              | Benign     | Uncertain significance |
| 6187 | c. 319T>A | rs878854944  | Pathogenic | Uncertain significance |
| 6188 | c. 316A>C | rs786202937  | Benign     | Uncertain significance |
| 6189 | c. 310A>C |              | Benign     | Uncertain significance |
| 6190 | c. 304G>A | rs1555596491 | Pathogenic | Uncertain significance |
| 6191 | c. 302A>G | rs587781798  | Benign     | Uncertain significance |
| 6192 | c. 301T>C | rs1555596637 | Benign     | Uncertain significance |
| 6193 | c. 296T>C | rs1567811021 | Benign     | Uncertain significance |
| 6194 | c. 292G>C | rs80357409   | Benign     | Uncertain significance |
| 6195 | c. 290C>T | rs431825393  | Benign     | Uncertain significance |
| 6196 | c. 290C>G | rs431825393  | Benign     | Uncertain significance |
| 6197 | c. 289A>G | rs1404795980 | Benign     | Uncertain significance |
| 6198 | c. 286G>C | rs80357110   | Benign     | Uncertain significance |
| 6199 | c. 286G>A | rs80357110   | Pathogenic | Uncertain significance |
| 6200 | c. 275C>G |              | Benign     | Uncertain significance |
| 6201 | c. 274G>C | rs863224755  | Benign     | Uncertain significance |
| 6202 | c. 272G>C |              | Benign     | Uncertain significance |
| 6203 | c. 272G>A | rs1333635543 | Pathogenic | Uncertain significance |
| 6204 | c. 271T>C | rs786203939  | Benign     | Uncertain significance |
| 6205 | c. 269T>C | rs80357174   | Benign     | Uncertain significance |
| 6206 | c. 268A>G | rs1555596673 | Pathogenic | Uncertain significance |
| 6207 | c. 266T>C | rs80357097   | Benign     | Uncertain significance |
| 6208 | c. 260T>G |              | Benign     | Uncertain significance |
| 6209 | c. 259T>G | rs80357091   | Benign     | Uncertain significance |



|      |              |              |            |                        |
|------|--------------|--------------|------------|------------------------|
| 6210 | c. 255G>T    | rs756499058  | Benign     | Uncertain significance |
| 6211 | c. 247G>A    | rs1060502343 | Pathogenic | Uncertain significance |
| 6212 | c. 247G>T    | rs1060502343 | Benign     | Uncertain significance |
| 6213 | c. 242A>T    | rs886040862  | Pathogenic | Uncertain significance |
| 6214 | c. 241C>G    | rs80357350   | Pathogenic | Uncertain significance |
| 6215 | c. 235T>G    |              | Benign     | Uncertain significance |
| 6216 | c. 230C>T    | rs80357209   | Benign     | Uncertain significance |
| 6217 | c. 230C>G    | rs80357209   | Benign     | Uncertain significance |
| 6218 | c. 228T>G    |              | Benign     | Uncertain significance |
| 6219 | c. 224A>T    |              | Pathogenic | Uncertain significance |
| 6220 | c. 222A>C    | rs730881465  | Benign     | Uncertain significance |
| 6221 | c. 220C>A    | rs80357234   | Benign     | Uncertain significance |
| 6222 | c. 216C>G    | rs80356967   | Benign     | Uncertain significance |
| 6223 | c. 216C>A    | rs80356967   | Benign     | Uncertain significance |
| 6224 | c. 213-14C>G | rs1060502337 | Benign     | Uncertain significance |
| 6225 | c. 212+11T>A |              | Benign     | Uncertain significance |
| 6226 | c. 207C>T    |              | Benign     | Uncertain significance |
| 6227 | c. 199G>A    | rs80357102   | Pathogenic | Uncertain significance |
| 6228 | c. 198T>A    |              | Benign     | Uncertain significance |
| 6229 | c. 189A>T    | rs80356956   | Benign     | Uncertain significance |
| 6230 | c. 185C>G    | rs786202286  | Benign     | Uncertain significance |
| 6231 | c. 179A>G    | rs373655067  | Pathogenic | Uncertain significance |
| 6232 | c. 176C>T    |              | Benign     | Uncertain significance |
| 6233 | c. 172C>T    | rs397508904  | Benign     | Uncertain significance |
| 6234 | c. 172C>A    | rs397508904  | Benign     | Uncertain significance |
| 6235 | c. 172C>G    | rs397508904  | Benign     | Uncertain significance |
| 6236 | c. 170G>C    |              | Benign     | Uncertain significance |
| 6237 | c. 169G>A    | rs879255289  | Pathogenic | Uncertain significance |
| 6238 | c. 169G>C    | rs879255289  | Benign     | Uncertain significance |
| 6239 | c. 165G>A    |              | Pathogenic | Uncertain significance |
| 6240 | c. 161A>G    | rs397507189  | Pathogenic | Uncertain significance |
| 6241 | c. 160C>A    | rs80356864   | Pathogenic | Uncertain significance |
| 6242 | c. 155T>C    | rs1060502346 | Benign     | Uncertain significance |
| 6243 | c. 152T>C    | rs1555597285 | Benign     | Uncertain significance |
| 6244 | c. 150A>T    | rs1555597289 | Benign     | Uncertain significance |
| 6245 | c. 146T>G    | rs273897660  | Benign     | Uncertain significance |
| 6246 | c. 142A>G    | rs879255477  | Benign     | Uncertain significance |
| 6247 | c. 139T>C    |              | Benign     | Uncertain significance |
| 6248 | c. 135A>T    | rs80356883   | Pathogenic | Uncertain significance |
| 6249 | c. 135-4A>G  |              | Pathogenic | Uncertain significance |
| 6250 | c. 134A>C    | rs80356863   | Benign     | Uncertain significance |
| 6251 | c. 128T>C    | rs1298544053 | Benign     | Uncertain significance |
| 6252 | c. 127T>C    | rs1555599214 | Benign     | Uncertain significance |
| 6253 | c. 124A>C    | rs80357163   | Benign     | Uncertain significance |
| 6254 | c. 118G>A    | rs879255290  | Pathogenic | Uncertain significance |
| 6255 | c. 114G>T    | rs1800062    | Benign     | Uncertain significance |
| 6256 | c. 107C>A    | rs183557525  | Benign     | Uncertain significance |
| 6257 | c. 106T>A    | rs905812561  | Benign     | Uncertain significance |
| 6258 | c. 103G>T    | rs879255284  | Benign     | Uncertain significance |
| 6259 | c. 101C>T    | rs786203319  | Benign     | Uncertain significance |
| 6260 | c. 100C>T    | rs1064793357 | Benign     | Uncertain significance |
| 6261 | c. 98A>C     | rs876660844  | Benign     | Uncertain significance |
| 6262 | c. 97G>C     | rs80357066   | Benign     | Uncertain significance |
| 6263 | c. 96G>C     |              | Benign     | Uncertain significance |

|      |              |              |            |                        |
|------|--------------|--------------|------------|------------------------|
| 6264 | c. 91A>G     |              | Benign     | Uncertain significance |
| 6265 | c. 86A>G     | rs773841328  | Benign     | Uncertain significance |
| 6266 | c. 83T>C     | rs80357266   | Benign     | Uncertain significance |
| 6267 | c. 82C>G     |              | Benign     | Uncertain significance |
| 6268 | c. 80G>C     | rs1064793052 | Benign     | Uncertain significance |
| 6269 | c. 77T>C     |              | Benign     | Uncertain significance |
| 6270 | c. 76A>T     |              | Benign     | Uncertain significance |
| 6271 | c. 74C>T     | rs876660096  | Benign     | Uncertain significance |
| 6272 | c. 71G>A     | rs80357198   | Pathogenic | Uncertain significance |
| 6273 | c. 70T>G     |              | Benign     | Uncertain significance |
| 6274 | c. 69G>C     | rs766004110  | Benign     | Uncertain significance |
| 6275 | c. 68A>C     |              | Benign     | Uncertain significance |
| 6276 | c. 67G>C     | rs372047427  | Benign     | Uncertain significance |
| 6277 | c. 66A>C     | rs786202533  | Pathogenic | Uncertain significance |
| 6278 | c. 62T>G     | rs1135401834 | Benign     | Uncertain significance |
| 6279 | c. 60A>C     | rs202168814  | Benign     | Uncertain significance |
| 6280 | c. 56A>G     |              | Pathogenic | Uncertain significance |
| 6281 | c. 54G>A     |              | Pathogenic | Uncertain significance |
| 6282 | c. 53T>G     | rs80356929   | Benign     | Uncertain significance |
| 6283 | c. 53T>A     | rs80356929   | Benign     | Uncertain significance |
| 6284 | c. 49G>T     | rs1402064476 | Benign     | Uncertain significance |
| 6285 | c. 48T>A     | rs1555600963 | Benign     | Uncertain significance |
| 6286 | c. 44T>C     | rs80357316   | Benign     | Uncertain significance |
| 6287 | c. 40G>T     |              | Benign     | Uncertain significance |
| 6288 | c. 37A>G     |              | Benign     | Uncertain significance |
| 6289 | c. 35A>G     | rs1555601006 | Benign     | Uncertain significance |
| 6290 | c. 34C>G     |              | Benign     | Uncertain significance |
| 6291 | c. 32T>G     | rs80357017   | Benign     | Uncertain significance |
| 6292 | c. 32T>C     | rs80357017   | Benign     | Uncertain significance |
| 6293 | c. 31G>C     | rs1555601019 | Benign     | Uncertain significance |
| 6294 | c. 25G>C     | rs1567823437 | Benign     | Uncertain significance |
| 6295 | c. 20G>T     |              | Benign     | Uncertain significance |
| 6296 | c. 19C>A     | rs80356994   | Benign     | Uncertain significance |
| 6297 | c. 16C>T     |              | Benign     | Uncertain significance |
| 6298 | c. 14C>T     | rs1335137805 | Benign     | Uncertain significance |
| 6299 | c. 13G>C     |              | Benign     | Uncertain significance |
| 6300 | c. 11C>T     | rs786203152  | Benign     | Uncertain significance |
| 6301 | c. 9A>T      | rs780157871  | Benign     | Uncertain significance |
| 6302 | c. -1A>G     | rs587781565  | Benign     | Uncertain significance |
| 6303 | c. -1A>C     | rs587781565  | Benign     | Uncertain significance |
| 6304 | c. -2A>T     | rs273899693  | Pathogenic | Uncertain significance |
| 6305 | c. -3G>T     | rs273900720  | Pathogenic | Uncertain significance |
| 6306 | c. -3G>C     | rs273900720  | Benign     | Uncertain significance |
| 6307 | c. -9C>G     | rs1555601059 | Benign     | Uncertain significance |
| 6308 | c. -11A>C    | rs273897654  | Benign     | Uncertain significance |
| 6309 | c. -13G>A    | rs431825383  | Pathogenic | Uncertain significance |
| 6310 | c. -14T>C    | rs273897661  | Benign     | Uncertain significance |
| 6311 | c. -20+59G>T | rs1057517547 | Benign     | Uncertain significance |
| 6312 | c. -20+3A>T  |              | Pathogenic | Uncertain significance |
| 6313 | c. -20+3A>G  | rs1064795882 | Pathogenic | Uncertain significance |
| 6314 | c. -20+2T>C  | rs1567824383 | Benign     | Uncertain significance |
| 6315 | c. -20+1G>C  |              | Benign     | Uncertain significance |
| 6316 | c. -20G>A    | rs886039588  | Benign     | Uncertain significance |
| 6317 | c. -22A>G    | rs886052976  | Benign     | Uncertain significance |

|      |           |              |        |                        |
|------|-----------|--------------|--------|------------------------|
| 6318 | c. -42T>G | rs544342552  | Benign | Uncertain significance |
| 6319 | c. -44C>T | rs1262271602 | Benign | Uncertain significance |
| 6320 | c. -61C>T | rs549332987  | Benign | Uncertain significance |
| 6321 | c. -62G>A | rs776540382  | Benign | Uncertain significance |



[illegible]



[illegible]

[illegible]

[illegible]
